# Supplementary material for: Volatile organic compound fluxes over a winter wheat field byPTR-Qi-TOF-MS and eddy covariance
Source: Copernicus journal article supplement (doi:10.5194/acp-2020-1328), 2021-01-13
Supplement: Supplementary file 1 [file COV3ER_2016_dataset-Correlation-Analysis.0.9.EN130.xlsx]

## Sheet: rescorranalysis.0.9.EN130
	Mass1	Mass2	MassDifference	MassSum	CorrelationType	intercept	slope	corr	resolution
1	31.018	31.029	0.011	62.047	Resolution	-0.156301	0.748813	0.990492	0.015509
2	33.033	33.045	0.012	66.078	Resolution	-0.03606	0.74866	0.993371	0.0165165
3	41.002	41.039	0.037	82.041	Unkwnown	-0.862094	90.1621	0.910517	0.020501
13	47.049	47.06	0.011	94.109	Resolution	-0.00268344	0.86485	0.998803	0.0235245
18	43.018	57.033	14.015	100.051	CH2	0.0817976	0.04591	0.903607	0.021509
24	43.018	61.028	18.01	104.046	H2O	-0.571937	0.798178	0.927173	0.021509
25	61.028	61.065	0.037	122.093	Resolution	0.0191458	0.0371482	0.922313	0.030514
34	57.07	69.07	12	126.14	C	-0.0571283	0.729324	0.928381	0.028535
35	68.049	69.07	1.021	137.119	Isotope-1	0.114966	24.2434	0.91747	0.0340245
38	57.033	71.049	14.016	128.082	CH2	-0.0308162	1.30235	0.939635	0.0285165
39	57.07	71.086	14.016	128.156	CH2	0.0365801	0.455878	0.926686	0.028535
41	75.044	75.068	0.024	150.112	Resolution	-0.0144474	0.107497	0.945912	0.037522
46	79.054	80.049	0.995	159.103	Isotope-1	0.0010587	0.0943594	0.967168	0.039527
47	81.07	82.078	1.008	163.148	Isotope-1	0.00928923	0.072695	0.989308	0.040535
60	83.01	83.049	0.039	166.059	Resolution	-0.0177998	10.2665	0.956897	0.041505
64	83	83.086	0.086	166.086	Unkwnown	-0.0328013	0.805271	0.960566	0.0415
65	53.939	83.911	29.972	137.85	Unkwnown	-3.17842e-05	0.767947	0.926617	0.0269695
66	54.947	83.911	28.964	138.858	Unkwnown	-4.17367e-05	0.735274	0.924245	0.0274735
71	83	84.081	1.081	167.081	Unkwnown	0.000944647	0.0640525	0.970522	0.0415
72	83.086	84.081	0.995	167.167	Isotope-1	0.00502169	0.0759077	0.966719	0.041543
77	57.07	85.101	28.031	142.171	C2H4	0.0119096	0.29236	0.903821	0.028535
79	71.086	85.101	14.015	156.187	CH2	-0.0161929	0.651172	0.990573	0.035543
83	86.036	86.06	0.024	172.096	Resolution	0.000982526	1.3533	0.979654	0.043018
84	57.07	86.096	29.026	143.166	Unkwnown	0.00169323	0.0209136	0.912205	0.028535
86	71.086	86.096	15.01	157.182	Unkwnown	0.000226396	0.0454267	0.977128	0.035543
90	85.101	86.096	0.995	171.197	Isotope-1	0.00169477	0.0685953	0.970153	0.0425505
94	57.033	87.044	30.011	144.077	Unkwnown	0.0336345	0.276908	0.902853	0.0285165
96	83.01	87.044	4.034	170.054	Isotope-4	-0.00417246	5.41028	0.903897	0.041505
104	43.018	89.023	46.005	132.041	Unkwnown	0.00853327	0.00579311	0.912281	0.021509
105	61.028	89.023	27.995	150.051	C2H4	0.0133154	0.00635829	0.939706	0.030514
107	61.028	89.042	28.014	150.07	C2H4	0.0259049	0.0299088	0.90576	0.030514
108	61.065	89.042	27.977	150.107	C2H4	0.0112067	0.789272	0.924258	0.0305325
109	89.023	89.042	0.019	178.065	Resolution	-0.0250314	4.04581	0.939926	0.0445115
111	61.065	89.06	27.995	150.125	C2H4	0.00768985	0.980278	0.920407	0.0305325
112	89.023	89.06	0.037	178.083	Resolution	-0.0352502	4.90858	0.917819	0.0445115
113	89.042	89.06	0.018	178.102	Resolution	-0.00614536	1.24022	0.997498	0.044521
115	61.065	89.096	28.031	150.161	C2H4	0.000434747	0.21068	0.927919	0.0305325
116	89.023	89.096	0.073	178.119	Unkwnown	-0.00874577	1.05224	0.90445	0.0445115
117	89.042	89.096	0.054	178.138	Resolution	-0.00250257	0.265776	0.989858	0.044521
118	89.06	89.096	0.036	178.156	Resolution	-0.00120902	0.214747	0.99533	0.04453
122	89.042	90.055	1.013	179.097	Isotope-1	-0.00152733	0.0701	0.906073	0.044521
127	91.039	91.05	0.011	182.089	Resolution	-0.000301366	1.18204	0.999381	0.0455195
129	91.039	91.058	0.019	182.097	Resolution	-0.000986809	1.23194	0.998901	0.0455195
130	91.05	91.058	0.008	182.108	Resolution	-0.000714846	1.04246	0.999766	0.045525
139	77.06	93.07	16.01	170.13	Unkwnown	-0.390256	42.0278	0.906961	0.03853
143	93.033	93.07	0.037	186.103	Resolution	0.16748	0.299582	0.902066	0.0465165
149	93.033	94.041	1.008	187.074	Isotope-1	0.01284	0.0733061	0.995362	0.0465165
150	93.07	94.041	0.971	187.111	Isotope-1	0.0181769	0.202568	0.917705	0.046535
157	93.033	95.049	2.016	188.082	Isotope-2	0.100787	0.114633	0.967619	0.0465165
158	93.07	95.049	1.979	188.119	Isotope-2	0.0937684	0.330739	0.929202	0.046535
159	94.041	95.049	1.008	189.09	Isotope-1	0.0777117	1.57619	0.977162	0.0470205
175	95.049	96.057	1.008	191.106	Isotope-1	0.00724164	0.0511503	0.932804	0.0475245
181	68.049	97.065	29.016	165.114	Unkwnown	0.0233178	4.32106	0.907869	0.0340245
183	69.07	97.065	27.995	166.135	C2H4	0.00900195	0.168553	0.93454	0.034535
191	71.086	97.101	26.015	168.187	C2H2	-0.0611839	0.843618	0.92951	0.035543
195	85.101	97.101	12	182.202	C	-0.041402	1.29966	0.940152	0.0425505
205	99.08	99.092	0.012	198.172	Resolution	0.0157566	1.19148	0.966694	0.04954
215	99.092	99.104	0.012	198.196	Resolution	0.0112075	0.986799	0.978374	0.049546
217	71.086	99.117	28.031	170.203	C2H4	-0.0320803	0.292484	0.943946	0.035543
221	85.101	99.117	14.016	184.218	CH2	-0.0263019	0.454313	0.963806	0.0425505
222	86.096	99.117	13.021	185.213	Unkwnown	-0.028721	6.21576	0.932731	0.043048
223	97.101	99.117	2.016	196.218	Isotope-2	0.00021418	0.313728	0.918513	0.0485505
224	99.092	99.117	0.025	198.209	Resolution	0.0236043	0.811971	0.909838	0.049546
225	99.104	99.117	0.013	198.221	Resolution	0.0100076	0.862275	0.974332	0.049552
229	83.049	101.06	18.011	184.109	H2O	-0.0191792	0.672513	0.920883	0.0415245
232	57.033	101.096	44.063	158.129	Unkwnown	0.00906571	0.111852	0.903947	0.0285165
234	83.01	101.096	18.086	184.106	Unkwnown	-0.00704403	2.24156	0.928994	0.041505
235	83.049	101.096	18.047	184.145	H2O	-0.00255128	0.213859	0.950952	0.0415245
237	87.044	101.096	14.052	188.14	CH2	-0.00156486	0.365333	0.905062	0.043522
238	101.06	101.096	0.036	202.156	Resolution	0.00488303	0.299425	0.97339	0.05053
243	102.068	102.104	0.036	204.172	Resolution	-0.00441091	1.04593	0.925243	0.051034
254	103.032	103.042	0.01	206.074	Resolution	0.000437265	1.36054	0.937354	0.051516
256	103.075	103.112	0.037	206.187	Resolution	-0.0040434	0.33445	0.962282	0.0515375
259	104.047	104.049	0.002	208.096	Resolution	9.12434e-05	1.01602	0.99865	0.0520235
261	104.047	104.062	0.015	208.109	Resolution	0.000165227	1.00857	0.990221	0.0520235
262	104.049	104.062	0.013	208.111	Resolution	6.98482e-05	0.993805	0.992696	0.0520245
266	105.037	105.057	0.02	210.094	Resolution	-0.00499786	0.997027	0.930261	0.0525185
271	105.057	105.07	0.013	210.127	Resolution	-0.0119329	0.839078	0.962202	0.0525285
275	105.07	106.078	1.008	211.148	Isotope-1	-0.00320376	0.178084	0.924065	0.052535
277	79.054	107.049	27.995	186.103	C2H4	-0.0518179	0.689981	0.901892	0.039527
285	107.049	107.086	0.037	214.135	Resolution	-0.0573214	2.49697	0.979218	0.0535245
298	107.049	108.081	1.032	215.13	Isotope-1	0.00424269	0.243514	0.975739	0.0535245
299	107.086	108.081	0.995	215.167	Isotope-1	0.0102497	0.0938471	0.959572	0.053543
300	108.057	108.081	0.024	216.138	Resolution	-0.00699234	1.49037	0.934347	0.0540285
305	107.049	108.093	1.044	215.142	Isotope-1	-9.77312e-05	0.250178	0.982013	0.0535245
306	107.086	108.093	1.007	215.179	Isotope-1	0.00585826	0.098315	0.985613	0.053543
308	108.081	108.093	0.012	216.174	Resolution	-0.00411898	1.01121	0.990911	0.0540405
312	95.086	109.065	13.979	204.151	CH2	0.0143677	0.31191	0.951496	0.047543
313	96.057	109.065	13.008	205.122	Unkwnown	0.00586965	3.94096	0.929797	0.0480285
314	97.065	109.065	12	206.13	C	-0.00997247	1.17253	0.914072	0.0485325
320	95.086	109.076	13.99	204.162	CH2	0.0246124	0.5559	0.95167	0.047543
321	96.057	109.076	13.019	205.133	Unkwnown	0.0109061	6.97677	0.923379	0.0480285
324	109.065	109.076	0.011	218.141	Resolution	0.00248285	1.75478	0.984738	0.0545325
331	95.086	109.089	14.003	204.175	CH2	0.0307022	0.686026	0.944272	0.047543
332	96.057	109.089	13.032	205.146	Unkwnown	0.0132318	8.62805	0.917378	0.0480285
335	109.065	109.089	0.024	218.154	Resolution	0.00350221	2.16468	0.976172	0.0545325
336	109.076	109.089	0.013	218.165	Resolution	-0.00133512	1.24149	0.997812	0.054538
343	95.086	109.101	14.015	204.187	CH2	0.0317058	0.722019	0.939428	0.047543
344	96.057	109.101	13.044	205.158	Unkwnown	0.0131055	9.0877	0.912508	0.0480285
346	97.101	109.101	12	206.202	C	0.000939958	0.864681	0.903818	0.0485505
347	109.065	109.101	0.036	218.166	Resolution	0.00338473	2.27583	0.969581	0.0545325
348	109.076	109.101	0.025	218.177	Resolution	-0.00273714	1.30985	0.99464	0.054538
349	109.089	109.101	0.012	218.19	Resolution	-0.00188033	1.05705	0.998705	0.0545445
356	95.086	110.06	14.974	205.146	Unkwnown	0.000287488	0.0241838	0.927984	0.047543
358	97.065	110.06	12.995	207.125	Unkwnown	-0.00166982	0.091513	0.900522	0.0485325
360	109.065	110.06	0.995	219.125	Isotope-1	-0.000366799	0.0739037	0.933399	0.0545325
361	109.076	110.06	0.984	219.136	Isotope-1	-3.50918e-05	0.0401737	0.902608	0.054538
368	95.086	110.073	14.987	205.159	Unkwnown	0.00112688	0.0547471	0.977765	0.047543
369	96.057	110.073	14.016	206.13	CH2	0.000838418	0.652456	0.904144	0.0480285
372	109.065	110.073	1.008	219.138	Isotope-1	-0.000150922	0.165697	0.972347	0.0545325
373	109.076	110.073	0.997	219.149	Isotope-1	-0.000112304	0.0932103	0.973513	0.054538
374	109.089	110.073	0.984	219.162	Isotope-1	0.000174358	0.074408	0.966313	0.0545445
375	109.101	110.073	0.972	219.174	Isotope-1	0.000491731	0.0697573	0.958753	0.0545505
376	110.06	110.073	0.013	220.133	Resolution	0.00228632	2.06244	0.957418	0.05503
381	95.086	110.084	14.998	205.17	Unkwnown	0.0011683	0.0802771	0.978587	0.047543
382	96.057	110.084	14.027	206.141	CH2	0.00082023	0.954268	0.902688	0.0480285
385	109.065	110.084	1.019	219.149	Isotope-1	-0.000504069	0.241375	0.966946	0.0545325
386	109.076	110.084	1.008	219.16	Isotope-1	-0.000787733	0.137295	0.979047	0.054538
387	109.089	110.084	0.995	219.173	Isotope-1	-0.000485783	0.110034	0.975748	0.0545445
388	109.101	110.084	0.983	219.185	Isotope-1	-5.58114e-05	0.103291	0.96944	0.0545505
389	110.06	110.084	0.024	220.144	Resolution	0.00343373	2.96133	0.938096	0.05503
390	110.073	110.084	0.011	220.157	Resolution	-0.000247449	1.45496	0.99297	0.0550365
395	95.086	110.109	15.023	205.195	Unkwnown	0.000721323	0.0934685	0.975271	0.047543
396	96.057	110.109	14.052	206.166	CH2	2.99068e-05	1.12042	0.906323	0.0480285
399	109.065	110.109	1.044	219.174	Isotope-1	-0.00117163	0.280611	0.96155	0.0545325
400	109.076	110.109	1.033	219.185	Isotope-1	-0.00181133	0.160992	0.982106	0.054538
401	109.089	110.109	1.02	219.198	Isotope-1	-0.00158105	0.129471	0.982227	0.0545445
402	109.101	110.109	1.008	219.21	Isotope-1	-0.00124269	0.122112	0.980473	0.0545505
403	110.06	110.109	0.049	220.169	Resolution	0.0043647	3.33609	0.903737	0.05503
404	110.073	110.109	0.036	220.182	Resolution	-0.000720183	1.68412	0.982968	0.0550365
405	110.084	110.109	0.025	220.193	Resolution	-0.000573079	1.16213	0.993941	0.055042
406	93.033	111.08	18.047	204.113	H2O	0.0502439	0.047387	0.919537	0.0465165
408	94.041	111.08	17.039	205.121	Unkwnown	0.0417653	0.647166	0.925684	0.0470205
409	95.049	111.08	16.031	206.129	Unkwnown	0.0183161	0.392097	0.906326	0.0475245
425	95.049	111.092	16.043	206.141	Unkwnown	0.0589594	0.356819	0.900809	0.0475245
428	97.101	111.092	13.991	208.193	CH2	0.0010224	0.658038	0.943251	0.0485505
435	111.08	111.092	0.012	222.172	Resolution	0.0538614	0.851493	0.929033	0.05554
438	71.086	111.104	40.018	182.19	Unkwnown	-0.0514271	0.611263	0.918136	0.035543
442	85.101	111.104	26.003	196.205	C2H2	-0.0369003	0.941032	0.92811	0.0425505
447	97.101	111.104	14.003	208.205	CH2	-0.00741532	0.725527	0.988594	0.0485505
449	99.117	111.104	11.987	210.221	C	0.0288675	1.96449	0.912657	0.0495585
457	111.092	111.104	0.012	222.196	Resolution	0.008169	1.02734	0.977965	0.055546
460	71.086	111.117	40.031	182.203	Unkwnown	-0.0549226	0.616296	0.919889	0.035543
464	85.101	111.117	26.016	196.218	C2H2	-0.0419783	0.954641	0.935559	0.0425505
469	97.101	111.117	14.016	208.218	CH2	-0.0117128	0.734965	0.995012	0.0485505
471	99.117	111.117	12	210.234	C	0.0245898	1.99433	0.920242	0.0495585
478	111.092	111.117	0.025	222.209	Resolution	0.0118406	1.00575	0.951947	0.055546
479	111.104	111.117	0.013	222.221	Resolution	-0.00126158	1.00058	0.994428	0.055552
484	111.08	112.007	0.927	223.087	Isotope-1	-0.00272432	0.0418552	0.95004	0.05554
489	111.08	112.052	0.972	223.132	Isotope-1	-0.00434412	0.136264	0.952508	0.05554
490	112.007	112.052	0.045	224.059	Resolution	0.00511797	3.14877	0.969941	0.0560035
504	97.101	112.088	14.987	209.189	Unkwnown	0.00103576	0.05988	0.910167	0.0485505
510	111.08	112.088	1.008	223.168	Isotope-1	0.00526925	0.0803917	0.935069	0.05554
511	111.092	112.088	0.996	223.18	Isotope-1	0.000625922	0.0924238	0.982514	0.055546
512	111.104	112.088	0.984	223.192	Isotope-1	0.00111042	0.084806	0.946705	0.055552
513	111.117	112.088	0.971	223.205	Isotope-1	0.00202581	0.0813213	0.91341	0.0555585
518	71.086	112.112	41.026	183.198	Unkwnown	-0.00622635	0.0671577	0.929248	0.035543
522	85.101	112.112	27.011	197.213	Unkwnown	-0.00473261	0.103741	0.942837	0.0425505
527	97.101	112.112	15.011	209.213	Unkwnown	-0.00110902	0.0788728	0.986774	0.0485505
529	99.117	112.112	12.995	211.229	Unkwnown	0.00255114	0.216252	0.925784	0.0495585
532	109.089	112.112	3.023	221.201	Isotope-3	0.00333797	0.0794729	0.906604	0.0545445
533	109.101	112.112	3.011	221.213	Isotope-3	0.00344756	0.0752925	0.90878	0.0545505
537	111.092	112.112	1.02	223.204	Isotope-1	0.00132406	0.108358	0.949301	0.055546
538	111.104	112.112	1.008	223.216	Isotope-1	2.13763e-05	0.107339	0.986735	0.055552
539	111.117	112.112	0.995	223.229	Isotope-1	0.000242542	0.106913	0.98847	0.0555585
540	112.088	112.112	0.024	224.2	Resolution	0.00138223	1.13497	0.93347	0.056044
544	111.08	113.015	1.935	224.095	Isotope-2	-0.022855	0.575855	0.943417	0.05554
545	112.007	113.015	1.008	225.022	Isotope-1	0.0178392	13.1794	0.95105	0.0560035
546	112.052	113.015	0.963	225.067	Isotope-1	-0.00362065	4.18725	0.980576	0.056026
550	112.052	113.06	1.008	225.112	Isotope-1	0.0122451	2.4989	0.949597	0.056026
551	113.015	113.06	0.045	226.075	Resolution	0.0150315	0.58991	0.957252	0.0565075
561	86.096	113.096	27	199.192	Unkwnown	-0.000513528	2.12483	0.918821	0.043048
573	71.086	113.107	42.021	184.193	Unkwnown	-0.00818228	0.147695	0.956973	0.035543
577	85.101	113.107	28.006	198.208	C2H4	-0.00382664	0.224463	0.956064	0.0425505
578	86.096	113.107	27.011	199.203	Unkwnown	-0.00815851	3.21613	0.968587	0.043048
581	99.104	113.107	14.003	212.211	CH2	0.0161512	0.407648	0.926341	0.049552
582	99.117	113.107	13.99	212.224	CH2	0.0111768	0.475062	0.954359	0.0495585
587	112.112	113.107	0.995	225.219	Isotope-1	0.0122067	1.93559	0.909972	0.056056
588	113.096	113.107	0.011	226.203	Resolution	-0.000644827	1.36528	0.951044	0.056548
591	114.091	114.128	0.037	228.219	Resolution	0.00426022	0.36161	0.981896	0.0570455
605	115.075	115.112	0.037	230.187	Resolution	0.00105296	0.486166	0.97028	0.0575375
609	115.075	115.123	0.048	230.198	Resolution	0.00081367	0.292344	0.929489	0.0575375
610	115.112	115.123	0.011	230.235	Resolution	-3.23711e-06	0.615806	0.980864	0.057556
612	103.042	117.07	14.028	220.112	CH2	-0.000847405	0.997433	0.940871	0.051521
616	103.042	117.078	14.036	220.12	CH2	-0.00103014	1.05001	0.928038	0.051521
619	117.07	117.078	0.008	234.148	Resolution	-0.000295812	1.06327	0.996276	0.058535
620	103.042	117.091	14.049	220.133	CH2	-0.00135012	1.03275	0.903391	0.051521
621	103.075	117.091	14.016	220.166	CH2	0.00377194	0.601452	0.900502	0.0515375
623	117.07	117.091	0.021	234.161	Resolution	-0.000846015	1.0604	0.983386	0.058535
624	117.078	117.091	0.013	234.169	Resolution	-0.000661323	1.00438	0.994038	0.058539
628	117.07	117.102	0.032	234.172	Resolution	-0.00133849	0.991104	0.967099	0.058535
629	117.078	117.102	0.024	234.18	Resolution	-0.00124426	0.943774	0.982801	0.058539
630	117.091	117.102	0.011	234.193	Resolution	-0.000726741	0.946586	0.995976	0.0585455
633	117.091	117.127	0.036	234.218	Resolution	-0.00301879	0.437456	0.926599	0.0585455
634	117.102	117.127	0.025	234.229	Resolution	-0.00277978	0.469332	0.944861	0.058551
638	118.065	118.078	0.013	236.143	Resolution	-4.26754e-05	0.943254	0.977774	0.0590325
641	118.065	118.081	0.016	236.146	Resolution	-6.6265e-05	0.879011	0.96386	0.0590325
642	118.078	118.081	0.003	236.159	Resolution	-3.02816e-05	0.939687	0.99402	0.059039
643	118.065	118.086	0.021	236.151	Resolution	-9.50915e-05	0.740624	0.931701	0.0590325
644	118.078	118.086	0.008	236.164	Resolution	-7.00867e-05	0.802688	0.974141	0.059039
645	118.081	118.086	0.005	236.167	Resolution	-4.66778e-05	0.859976	0.986628	0.0590405
648	119.06	119.086	0.026	238.146	Resolution	-0.00288076	1.30338	0.998785	0.05953
661	121.052	121.065	0.013	242.117	Resolution	-0.00180062	1.54736	0.939494	0.060526
663	106.078	121.089	15.011	227.167	Unkwnown	0.00564892	9.67881	0.906816	0.053039
669	121.065	121.089	0.024	242.154	Resolution	-0.0115265	1.53565	0.971817	0.0605325
670	106.078	121.101	15.023	227.179	Unkwnown	0.000248611	9.5276	0.90474	0.053039
675	121.065	121.101	0.036	242.166	Resolution	-0.0145324	1.47437	0.944371	0.0605325
676	121.089	121.101	0.012	242.19	Resolution	-0.00523167	0.98332	0.99475	0.0605445
679	114.091	122.06	7.969	236.151	Unkwnown	0.00458894	0.244936	0.913346	0.0570455
680	114.128	122.06	7.932	236.188	Unkwnown	0.00203606	0.665877	0.914334	0.057064
688	122.06	122.084	0.024	244.144	Resolution	-0.00179522	1.07226	0.933412	0.06103
697	121.089	122.096	1.007	243.185	Isotope-1	0.00622228	0.118568	0.931113	0.0605445
698	121.101	122.096	0.995	243.197	Isotope-1	0.00691428	0.119699	0.930466	0.0605505
700	122.084	122.096	0.012	244.18	Resolution	-0.00215278	0.82419	0.973184	0.061042
701	57.07	123.092	66.022	180.162	Unkwnown	-0.0183304	0.211133	0.910258	0.028535
707	95.086	123.092	28.006	218.178	C2H4	0.0486981	0.372692	0.902227	0.047543
711	109.065	123.092	14.027	232.157	CH2	0.0292409	1.21295	0.956789	0.0545325
712	109.076	123.092	14.016	232.168	CH2	0.0272537	0.692433	0.973222	0.054538
713	109.089	123.092	14.003	232.181	CH2	0.0278179	0.558395	0.976047	0.0545445
714	109.101	123.092	13.991	232.193	CH2	0.0285585	0.529124	0.978572	0.0545505
716	110.073	123.092	13.019	233.165	Unkwnown	0.0375988	6.9721	0.935475	0.0550365
717	110.084	123.092	13.008	233.176	Unkwnown	0.0394523	4.76972	0.938149	0.055042
718	110.109	123.092	12.983	233.201	Unkwnown	0.0411564	4.12314	0.948148	0.0550545
723	112.112	123.092	10.98	235.204	Unkwnown	0.0340135	5.85887	0.902041	0.056056
724	105.037	124.039	19.002	229.076	Unkwnown	0.00117697	0.116044	0.949286	0.0525185
726	114.091	124.039	9.948	238.13	Unkwnown	0.00339837	0.119455	0.923301	0.0570455
729	105.037	124.057	19.02	229.094	Unkwnown	0.00150091	0.127837	0.956834	0.0525185
731	114.091	124.057	9.966	238.148	Unkwnown	0.00400086	0.130824	0.92521	0.0570455
735	124.039	124.057	0.018	248.096	Resolution	0.000413841	1.08353	0.991315	0.0620195
741	115.075	125.042	9.967	240.117	Unkwnown	0.00362692	0.395005	0.905975	0.0575375
751	115.075	125.06	9.985	240.135	Unkwnown	0.00421777	0.614803	0.912758	0.0575375
752	115.112	125.06	9.948	240.172	Unkwnown	0.00339462	1.22453	0.910747	0.057556
754	125.042	125.06	0.018	250.102	Resolution	-0.000815285	1.50965	0.977147	0.062521
766	125.042	125.071	0.029	250.113	Resolution	0.00104817	1.80148	0.955588	0.062521
767	125.06	125.071	0.011	250.131	Resolution	0.00172726	1.20883	0.99051	0.06253
771	69.033	125.084	56.051	194.117	Unkwnown	0.00683896	0.567194	0.919578	0.0345165
775	85.065	125.084	40.019	210.149	Unkwnown	0.00263794	0.437536	0.906504	0.0425325
777	97.065	125.084	28.019	222.149	C2H4	0.00423464	0.303167	0.909788	0.0485325
781	57.07	125.096	68.026	182.166	Unkwnown	-0.00431001	0.0855317	0.920829	0.028535
783	69.07	125.096	56.026	194.166	Unkwnown	0.00799612	0.108484	0.923985	0.034535
784	71.086	125.096	54.01	196.182	Unkwnown	-0.00548709	0.175545	0.930744	0.035543
785	83	125.096	42.096	208.096	Unkwnown	0.0102962	0.123304	0.906243	0.0415
786	83.086	125.096	42.01	208.182	Unkwnown	0.0179069	0.146715	0.908148	0.041543
787	84.081	125.096	41.015	209.177	Unkwnown	0.00885149	1.91458	0.917649	0.0420405
788	85.101	125.096	39.995	210.197	Unkwnown	0.000626732	0.263563	0.917927	0.0425505
789	86.096	125.096	39	211.192	Unkwnown	-0.00314323	3.71546	0.912713	0.043048
791	97.065	125.096	28.031	222.161	C2H4	0.00760099	0.597273	0.916371	0.0485325
792	97.101	125.096	27.995	222.197	C2H4	0.0105582	0.198226	0.951451	0.0485505
803	111.092	125.096	14.004	236.188	CH2	0.0152823	0.278588	0.936462	0.055546
804	111.104	125.096	13.992	236.2	CH2	0.0131365	0.27088	0.955217	0.055552
805	111.117	125.096	13.979	236.213	CH2	0.0145792	0.266044	0.94344	0.0555585
806	112.088	125.096	13.008	237.184	Unkwnown	0.0151346	2.93206	0.924725	0.056044
807	112.112	125.096	12.984	237.208	Unkwnown	0.0140857	2.48408	0.952566	0.056056
808	113.096	125.096	12	238.192	C	0.00429184	1.60466	0.91178	0.056548
809	113.107	125.096	11.989	238.203	C	0.00693136	1.14468	0.934144	0.0565535
812	57.07	125.107	68.037	182.177	Unkwnown	-0.012069	0.126085	0.900707	0.028535
815	71.086	125.107	54.021	196.193	Unkwnown	-0.0180471	0.267786	0.941199	0.035543
817	83.086	125.107	42.021	208.193	Unkwnown	0.0193734	0.219514	0.901451	0.041543
819	85.101	125.107	40.006	210.208	Unkwnown	-0.0109083	0.409586	0.945574	0.0425505
820	86.096	125.107	39.011	211.203	Unkwnown	-0.0135062	5.62311	0.915759	0.043048
823	97.101	125.107	28.006	222.208	C2H4	0.00435664	0.308552	0.982517	0.0485505
826	99.117	125.107	25.99	224.224	C2H2	0.0168572	0.863188	0.938831	0.0495585
833	111.092	125.107	14.015	236.199	CH2	0.0131015	0.427378	0.9526	0.055546
834	111.104	125.107	14.003	236.211	CH2	0.00856236	0.420829	0.984289	0.055552
835	111.117	125.107	13.99	236.224	CH2	0.00986374	0.417311	0.981707	0.0555585
836	112.088	125.107	13.019	237.195	Unkwnown	0.0142239	4.43428	0.927383	0.056044
837	112.112	125.107	12.995	237.219	Unkwnown	0.00991936	3.86381	0.982722	0.056056
839	113.107	125.107	12	238.214	C	0.00146601	1.73688	0.939598	0.0565535
841	125.096	125.107	0.011	250.203	Resolution	-0.00626015	1.48119	0.982668	0.062548
844	71.086	125.12	54.034	196.206	Unkwnown	-0.0254185	0.314487	0.937816	0.035543
848	85.101	125.12	40.019	210.221	Unkwnown	-0.0181796	0.484958	0.949894	0.0425505
849	86.096	125.12	39.024	211.216	Unkwnown	-0.0197049	6.58615	0.910026	0.043048
852	97.101	125.12	28.019	222.221	C2H4	2.32646e-05	0.364948	0.986427	0.0485505
855	99.117	125.12	26.003	224.237	C2H2	0.0140765	1.02789	0.948452	0.0495585
861	111.092	125.12	14.028	236.212	CH2	0.0111613	0.501916	0.949329	0.055546
862	111.104	125.12	14.016	236.224	CH2	0.00515767	0.49707	0.986739	0.055552
863	111.117	125.12	14.003	236.237	CH2	0.00618542	0.49508	0.988568	0.0555585
864	112.088	125.12	13.032	237.208	Unkwnown	0.0131956	5.17381	0.918157	0.056044
865	112.112	125.12	13.008	237.232	Unkwnown	0.00672741	4.56513	0.985394	0.056056
867	113.107	125.12	12.013	238.227	C	-0.00215503	2.03412	0.933547	0.0565535
869	125.096	125.12	0.024	250.216	Resolution	-0.00983109	1.71689	0.966755	0.062548
870	125.107	125.12	0.013	250.227	Resolution	-0.00422427	1.1744	0.996704	0.0625535
883	113.096	127.112	14.016	240.208	CH2	0.00470958	0.89082	0.970287	0.056548
884	113.107	127.112	14.005	240.219	CH2	0.00882857	0.592218	0.925927	0.0565535
890	71.086	127.136	56.05	198.222	Unkwnown	0.000160603	0.13613	0.935249	0.035543
894	85.101	127.136	42.035	212.237	Unkwnown	0.00428377	0.206513	0.933253	0.0425505
895	86.096	127.136	41.04	213.232	Unkwnown	-4.93465e-05	2.97502	0.952779	0.043048
898	99.104	127.136	28.032	226.24	C2H4	0.0228218	0.373627	0.902045	0.049552
899	99.117	127.136	28.019	226.253	C2H4	0.0184607	0.433539	0.925149	0.0495585
905	113.096	127.136	14.04	240.232	CH2	0.00709933	1.25856	0.932275	0.056548
906	113.107	127.136	14.029	240.243	CH2	0.00806266	0.915824	0.973569	0.0565535
910	127.112	127.136	0.024	254.248	Resolution	0.000847842	1.40391	0.95449	0.063556
911	116.143	127.903	11.76	244.046	Unkwnown	1.2542e-22	0.290405	1	0.0580715
917	113.096	128.12	15.024	241.216	Unkwnown	-0.000631433	0.152839	0.913808	0.056548
920	127.112	128.12	1.008	255.232	Isotope-1	-0.00141395	0.171006	0.939019	0.063556
921	127.136	128.12	0.984	255.256	Isotope-1	-0.00102622	0.114167	0.922345	0.063568
923	71.086	128.143	57.057	199.229	Unkwnown	-0.00164853	0.0172224	0.912876	0.035543
927	85.101	128.143	43.042	213.244	Unkwnown	-0.00112943	0.0261356	0.911182	0.0425505
928	86.096	128.143	42.047	214.239	Unkwnown	-0.0016914	0.377137	0.931326	0.043048
938	113.107	128.143	15.036	241.25	Unkwnown	-0.000587985	0.114874	0.941647	0.0565535
942	127.112	128.143	1.031	255.255	Isotope-1	-0.00144508	0.175035	0.917912	0.063556
943	127.136	128.143	1.007	255.279	Isotope-1	-0.00160615	0.125539	0.968434	0.063568
944	128.12	128.143	0.023	256.263	Resolution	0.000206415	0.991199	0.946671	0.06406
957	115.112	129.07	13.958	244.182	CH2	0.00561562	1.17499	0.901557	0.057556
958	115.123	129.07	13.947	244.193	CH2	0.00566059	1.90308	0.916675	0.0575615
963	129.045	129.07	0.025	258.115	Resolution	-0.0018776	1.43708	0.976839	0.0645225
968	115.112	129.091	13.979	244.203	CH2	0.0028497	1.18507	0.9091	0.057556
969	115.123	129.091	13.968	244.214	CH2	0.00284981	1.92521	0.92716	0.0575615
975	129.045	129.091	0.046	258.136	Resolution	-0.00339663	1.3653	0.928231	0.0645225
976	129.07	129.091	0.021	258.161	Resolution	-0.00225346	0.981266	0.981385	0.064535
977	87.08	129.127	42.047	216.207	Unkwnown	0.000650673	0.200409	0.904534	0.04354
984	129.091	129.127	0.036	258.218	Resolution	-0.00167529	0.508935	0.933745	0.0645455
989	129.127	129.139	0.012	258.266	Resolution	-0.00116293	0.787654	0.981837	0.0645635
992	129.127	129.151	0.024	258.278	Resolution	-0.00253455	0.639513	0.945104	0.0645635
993	129.139	129.151	0.012	258.29	Resolution	-0.00162967	0.820309	0.972511	0.0645695
1008	131.06	133.065	2.005	264.125	Isotope-2	0.000965475	1.93128	0.913826	0.06553
1012	133.065	133.101	0.036	266.166	Resolution	-0.00371554	1.38915	0.964508	0.0665325
1019	135.08	135.117	0.037	270.197	Resolution	-0.0143759	1.75161	0.999003	0.06754
1028	125.071	137.047	11.976	262.118	C	0.00076191	0.419445	0.903436	0.0625355
1051	137.047	137.06	0.013	274.107	Resolution	-0.000904057	1.38847	0.958216	0.0685235
1053	81.07	137.071	56.001	218.141	Unkwnown	0.00590735	0.0375561	0.94996	0.040535
1054	82.078	137.071	54.993	219.149	Unkwnown	0.00133554	0.510813	0.946518	0.041039
1062	137.06	137.071	0.011	274.131	Resolution	-0.00183327	1.59723	0.918117	0.06853
1063	81.07	137.132	56.062	218.202	Unkwnown	-0.0281545	0.404123	0.983773	0.040535
1064	82.078	137.132	55.054	219.21	Unkwnown	-0.0735777	5.40014	0.976004	0.041039
1068	137.071	137.132	0.061	274.203	Resolution	-0.0628643	9.40622	0.917501	0.0685355
1072	71.086	139.148	68.062	210.234	Unkwnown	-0.0124514	0.152798	0.922714	0.035543
1076	85.101	139.148	54.047	224.249	Unkwnown	-0.00817717	0.233016	0.9245	0.0425505
1077	86.096	139.148	53.052	225.244	Unkwnown	-0.0101674	3.22272	0.902898	0.043048
1080	97.101	139.148	42.047	236.249	Unkwnown	0.00130402	0.173166	0.947057	0.0485505
1082	99.104	139.148	40.044	238.252	Unkwnown	0.0122037	0.426412	0.901706	0.049552
1083	99.117	139.148	40.031	238.265	Unkwnown	0.00675496	0.499251	0.933513	0.0495585
1091	111.092	139.148	28.056	250.24	C2H4	0.00511886	0.244774	0.937266	0.055546
1092	111.104	139.148	28.044	250.252	C2H4	0.00298284	0.239061	0.960441	0.055552
1093	111.117	139.148	28.031	250.265	C2H4	0.00416117	0.235197	0.950364	0.0555585
1094	112.088	139.148	27.06	251.236	Unkwnown	0.00556629	2.5489	0.916737	0.056044
1095	112.112	139.148	27.036	251.26	Unkwnown	0.003884	2.1898	0.957665	0.056056
1097	113.107	139.148	26.041	252.255	C2H2	-0.00259648	1.0119	0.94159	0.0565535
1099	125.096	139.148	14.052	264.244	CH2	-0.00615979	0.850782	0.970355	0.062548
1100	125.107	139.148	14.041	264.255	CH2	-0.0021603	0.570656	0.980871	0.0625535
1101	125.12	139.148	14.028	264.268	CH2	0.000482154	0.481105	0.974272	0.06256
1103	127.136	139.148	12.012	266.284	C	-0.0073336	1.04	0.910078	0.063568
1106	116.143	144.175	28.032	260.318	C2H4	8.07052e-22	1.32118	1	0.0580715
1107	127.903	144.175	16.272	272.078	Unkwnown	8.28864e-22	4.54944	1	0.0639515
1110	145.076	145.122	0.046	290.198	Resolution	-0.00186304	1.59692	0.934453	0.072538
1111	116.143	145.962	29.819	262.105	Unkwnown	1.84313e-21	0.3033	1	0.0580715
1112	127.903	145.962	18.059	273.865	H2O	1.84313e-21	1.04441	1	0.0639515
1114	144.175	145.962	1.787	290.137	Unkwnown	1.84858e-21	0.229568	1	0.0720875
1115	116.143	145.968	29.825	262.111	Unkwnown	2.45933e-21	0.424583	1	0.0580715
1116	127.903	145.968	18.065	273.871	H2O	2.46478e-21	1.46204	1	0.0639515
1118	144.175	145.968	1.793	290.143	Unkwnown	2.46478e-21	0.321366	1	0.0720875
1119	145.962	145.968	0.006	291.93	Resolution	2.45933e-21	1.39988	1	0.072981
1120	146.97	146.976	0.006	293.946	Resolution	0.000210536	1.01403	0.995779	0.073485
1125	95.086	149.096	54.01	244.182	Unkwnown	0.00726774	0.117018	0.914881	0.047543
1126	96.057	149.096	53.039	245.153	Unkwnown	0.00312482	1.50967	0.908806	0.0480285
1128	109.065	149.096	40.031	258.161	Unkwnown	0.00317945	0.364882	0.931462	0.0545325
1129	109.076	149.096	40.02	258.172	Unkwnown	0.00238494	0.209174	0.95093	0.054538
1130	109.089	149.096	40.007	258.185	Unkwnown	0.0024682	0.168997	0.955332	0.0545445
1131	109.101	149.096	39.995	258.197	Unkwnown	0.00254644	0.160639	0.96078	0.0545505
1133	110.073	149.096	39.023	259.169	Unkwnown	0.00488527	2.13617	0.928659	0.0550365
1134	110.084	149.096	39.012	259.18	Unkwnown	0.00524589	1.46828	0.935503	0.055042
1135	110.109	149.096	38.987	259.205	Unkwnown	0.00543056	1.27914	0.952793	0.0550545
1139	123.092	149.096	26.004	272.188	C2H2	-0.00505632	0.297755	0.964093	0.061546
1162	109.076	152.12	43.044	261.196	Unkwnown	-0.000581597	0.0442866	0.903912	0.054538
1165	110.06	152.12	42.06	262.18	Unkwnown	0.000268083	1.01217	0.919265	0.05503
1166	110.073	152.12	42.047	262.193	Unkwnown	-0.000562326	0.476762	0.932626	0.0550365
1167	110.084	152.12	42.036	262.204	Unkwnown	-0.000425104	0.325812	0.933771	0.055042
1168	110.109	152.12	42.011	262.229	Unkwnown	4.04283e-05	0.271483	0.909671	0.0550545
1172	151.075	152.12	1.045	303.195	Isotope-1	0.000458375	0.336098	0.944456	0.0755375
1183	125.06	153.055	27.995	278.115	C2H4	-0.00150317	0.883295	0.904408	0.06253
1184	125.071	153.055	27.984	278.126	C2H4	-0.00265417	0.726188	0.907425	0.0625355
1199	137.06	153.07	16.01	290.13	Unkwnown	-0.00506743	1.62243	0.901813	0.06853
1201	153.055	153.07	0.015	306.125	Resolution	-0.00244405	1.3721	0.908552	0.0765275
1202	81.07	153.127	72.057	234.197	Unkwnown	-0.0122853	0.126412	0.908904	0.040535
1208	135.08	153.127	18.047	288.207	H2O	0.0215403	0.274284	0.982595	0.06754
1209	135.117	153.127	18.01	288.244	H2O	0.0238268	0.156238	0.981355	0.0675585
1211	137.071	153.127	16.056	290.198	Unkwnown	-0.0261701	3.08441	0.90628	0.0685355
1212	137.132	153.127	15.995	290.259	Unkwnown	-0.00237604	0.304792	0.908481	0.068566
1213	81.07	153.151	72.081	234.221	Unkwnown	-0.00512611	0.111073	0.922344	0.040535
1214	82.078	153.151	71.073	235.229	Unkwnown	-0.0171372	1.47212	0.919371	0.041039
1217	135.08	153.151	18.071	288.231	H2O	0.0250029	0.234792	0.966496	0.06754
1218	135.117	153.151	18.034	288.268	H2O	0.0269579	0.133766	0.96523	0.0675585
1219	137.071	153.151	16.08	290.222	Unkwnown	-0.0167131	2.68137	0.905327	0.0685355
1220	137.132	153.151	16.019	290.283	Unkwnown	0.00331624	0.269732	0.927374	0.068566
1221	153.127	153.151	0.024	306.278	Resolution	0.00632725	0.862004	0.991468	0.0765635
1222	116.143	153.98	37.837	270.123	Unkwnown	3.79532e-21	0.613121	1	0.0580715
1223	127.903	153.98	26.077	281.883	C2H2	3.80623e-21	2.11126	1	0.0639515
1225	144.175	153.98	9.805	298.155	Unkwnown	3.80623e-21	0.464071	1	0.0720875
1226	145.962	153.98	8.018	299.942	Unkwnown	3.79532e-21	2.0215	1	0.072981
1227	145.968	153.98	8.012	299.948	Unkwnown	3.80623e-21	1.44406	1	0.072984
1264	155.086	155.107	0.021	310.193	Resolution	-0.000180394	1.0228	0.99175	0.077543
1279	113.096	155.142	42.046	268.238	Unkwnown	0.000185039	0.587559	0.918735	0.056548
1280	113.107	155.142	42.035	268.249	Unkwnown	0.0013987	0.415103	0.931676	0.0565535
1285	127.112	155.142	28.03	282.254	C2H4	-0.00231124	0.646066	0.927702	0.063556
1286	127.136	155.142	28.006	282.278	C2H4	-0.00186613	0.447194	0.944636	0.063568
1287	128.12	155.142	27.022	283.262	Unkwnown	0.00466664	3.5188	0.920129	0.06406
1288	128.143	155.142	26.999	283.285	Unkwnown	0.00496818	3.38997	0.928033	0.0640715
1301	163.063	163.075	0.012	326.138	Resolution	0.00025781	1.16266	0.977817	0.0815315
1304	163.075	163.099	0.024	326.174	Resolution	0.00443288	1.37715	0.900706	0.0815375
1320	163.099	163.123	0.024	326.222	Resolution	0.00117441	1.27653	0.953738	0.0815495
1344	163.099	163.136	0.037	326.235	Resolution	0.00214117	1.24523	0.923517	0.0815495
1345	163.123	163.136	0.013	326.259	Resolution	0.000365882	1.00248	0.994927	0.0815615
1350	83.086	163.148	80.062	246.234	Unkwnown	0.000636525	0.0562269	0.903378	0.041543
1378	163.123	163.148	0.025	326.271	Resolution	0.000954924	0.960062	0.981992	0.0815615
1379	163.136	163.148	0.012	326.284	Resolution	0.000413104	0.965751	0.995183	0.081568
1389	116.143	165.985	49.842	282.128	Unkwnown	-4.25338e-21	0.821435	1	0.0580715
1390	127.903	165.985	38.082	293.888	Unkwnown	-4.25338e-21	2.82859	1	0.0639515
1392	144.175	165.985	21.81	310.16	Unkwnown	-4.24247e-21	0.621744	1	0.0720875
1393	145.962	165.985	20.023	311.947	Unkwnown	-4.25338e-21	2.70832	1	0.072981
1394	145.968	165.985	20.017	311.953	Unkwnown	-4.25338e-21	1.93469	1	0.072984
1395	153.98	165.985	12.005	319.965	C	-4.26429e-21	1.33976	1	0.07699
1396	166.062	166.078	0.016	332.14	Resolution	2.88949e-05	1.39111	0.944022	0.083031
1402	85.101	166.135	81.034	251.236	Unkwnown	-0.00389186	0.0333879	0.913257	0.0425505
1405	97.101	166.135	69.034	263.236	Unkwnown	-0.00272143	0.0253719	0.953982	0.0485505
1407	99.117	166.135	67.018	265.252	Unkwnown	-0.0016031	0.0701233	0.903415	0.0495585
1409	109.076	166.135	57.059	275.211	Unkwnown	-0.00153383	0.0326679	0.900594	0.054538
1410	109.089	166.135	57.046	275.224	Unkwnown	-0.00158645	0.0266296	0.913182	0.0545445
1411	109.101	166.135	57.034	275.236	Unkwnown	-0.00157416	0.0253127	0.918319	0.0545505
1416	111.104	166.135	55.031	277.239	Unkwnown	-0.0022934	0.0342567	0.946926	0.055552
1417	111.117	166.135	55.018	277.252	Unkwnown	-0.00227131	0.0343267	0.954124	0.0555585
1419	112.112	166.135	54.023	278.247	Unkwnown	-0.0023605	0.321517	0.967228	0.056056
1421	123.092	166.135	43.043	289.227	Unkwnown	-0.00279675	0.0470533	0.922107	0.061546
1422	125.096	166.135	41.039	291.231	Unkwnown	-0.0031121	0.115547	0.906921	0.062548
1423	125.107	166.135	41.028	291.242	Unkwnown	-0.00280373	0.0796753	0.942505	0.0625535
1424	125.12	166.135	41.015	291.255	Unkwnown	-0.00253768	0.0680109	0.9479	0.06256
1427	139.148	166.135	26.987	305.283	Unkwnown	-0.00219017	0.134378	0.925221	0.069574
1428	149.096	166.135	17.039	315.231	Unkwnown	-0.00157319	0.149429	0.903751	0.074548
1437	95.049	167.07	72.021	262.119	Unkwnown	-0.00250519	0.341308	0.92258	0.0475245
1438	96.057	167.07	71.013	263.127	Unkwnown	-0.0335472	6.10868	0.905681	0.0480285
1445	111.092	167.07	55.978	278.162	Unkwnown	-0.0327068	0.838625	0.901246	0.055546
1462	95.049	167.086	72.037	262.135	Unkwnown	0.00301391	0.268158	0.923237	0.0475245
1463	96.057	167.086	71.029	263.143	Unkwnown	-0.0217101	4.81039	0.908334	0.0480285
1471	111.092	167.086	55.994	278.178	Unkwnown	-0.0226718	0.667699	0.913371	0.055546
1472	111.104	167.086	55.982	278.19	Unkwnown	-0.0227324	0.627727	0.902043	0.055552
1474	112.088	167.086	54.998	279.174	Unkwnown	-0.0238311	7.0654	0.908027	0.056044
1483	167.07	167.086	0.016	334.156	Resolution	0.0054201	0.782828	0.997107	0.083535
1494	161.132	175.148	14.016	336.28	CH2	-0.000918706	0.715058	0.911393	0.080566
1519	123.092	178.123	55.031	301.215	Unkwnown	-0.00231931	0.0329572	0.915121	0.061546
1532	166.135	178.123	11.988	344.258	C	-7.64567e-05	0.651513	0.924379	0.0830675
1572	97.101	179.128	82.027	276.229	Unkwnown	-0.00542269	0.0929251	0.955387	0.0485505
1575	109.076	179.128	70.052	288.204	Unkwnown	-0.00118759	0.120156	0.905556	0.054538
1576	109.089	179.128	70.039	288.217	Unkwnown	-0.0013675	0.0978978	0.917764	0.0545445
1577	109.101	179.128	70.027	288.229	Unkwnown	-0.0014361	0.0934466	0.926724	0.0545505
1582	111.104	179.128	68.024	290.232	Unkwnown	-0.00364871	0.124593	0.941867	0.055552
1583	111.117	179.128	68.011	290.245	Unkwnown	-0.00365253	0.125205	0.951627	0.0555585
1585	112.112	179.128	67.016	291.24	Unkwnown	-0.00379337	1.16546	0.958193	0.056056
1587	123.092	179.128	56.036	302.22	Unkwnown	-0.0062637	0.175425	0.939307	0.061546
1589	125.107	179.128	54.021	304.235	Unkwnown	-0.00513166	0.286329	0.925901	0.0625535
1590	125.12	179.128	54.008	304.248	Unkwnown	-0.00414118	0.244131	0.930232	0.06256
1592	149.096	179.128	30.032	328.224	Unkwnown	-0.00170101	0.557085	0.920421	0.074548
1595	166.135	179.128	12.993	345.263	Unkwnown	0.00523462	3.54366	0.968305	0.0830675
1596	167.07	179.128	12.058	346.198	C	0.00523851	0.133899	0.901981	0.083535
1598	178.123	179.128	1.005	357.251	Isotope-1	0.00811145	4.77504	0.919299	0.0890615
1600	116.143	179.929	63.786	296.072	Unkwnown	1.7886e-21	0.423213	1	0.0580715
1601	127.903	179.929	52.026	307.832	Unkwnown	1.79405e-21	1.45732	1	0.0639515
1603	144.175	179.929	35.754	324.104	Unkwnown	1.79951e-21	0.320329	1	0.0720875
1604	145.962	179.929	33.967	325.891	Unkwnown	1.7886e-21	1.39536	1	0.072981
1605	145.968	179.929	33.961	325.897	Unkwnown	1.79405e-21	0.996773	1	0.072984
1606	153.98	179.929	25.949	333.909	C2H2	1.78315e-21	0.69026	1	0.07699
1607	165.985	179.929	13.944	345.914	CH2	1.76134e-21	0.515211	1	0.0829925
1616	97.101	180.151	83.05	277.252	Unkwnown	-0.003804	0.0327749	0.952802	0.0485505
1621	109.089	180.151	71.062	289.24	Unkwnown	-0.00224609	0.0340689	0.902945	0.0545445
1622	109.101	180.151	71.05	289.252	Unkwnown	-0.00227402	0.0325338	0.912212	0.0545505
1626	111.104	180.151	69.047	291.255	Unkwnown	-0.0032089	0.0440736	0.941826	0.055552
1627	111.117	180.151	69.034	291.268	Unkwnown	-0.00323679	0.044403	0.954126	0.0555585
1629	112.112	180.151	68.039	292.263	Unkwnown	-0.00327222	0.412748	0.95896	0.056056
1631	123.092	180.151	57.059	303.243	Unkwnown	-0.00380328	0.0602462	0.911874	0.061546
1633	125.107	180.151	55.044	305.258	Unkwnown	-0.00371725	0.101136	0.92436	0.0625535
1634	125.12	180.151	55.031	305.271	Unkwnown	-0.00343776	0.0868044	0.93489	0.06256
1639	166.135	180.151	14.016	346.286	CH2	-8.09754e-05	1.25603	0.969909	0.0830675
1642	178.123	180.151	2.028	358.274	Isotope-2	0.00103579	1.66629	0.906735	0.0890615
1644	179.128	180.151	1.023	359.279	Isotope-1	-0.00173297	0.346563	0.979569	0.089564
1645	116.143	180.937	64.794	297.08	Unkwnown	5.25674e-21	0.987766	1	0.0580715
1646	127.903	180.937	53.034	308.84	Unkwnown	5.25674e-21	3.40134	1	0.0639515
1648	144.175	180.937	36.762	325.112	Unkwnown	5.25674e-21	0.74764	1	0.0720875
1649	145.962	180.937	34.975	326.899	Unkwnown	5.23493e-21	3.25673	1	0.072981
1650	145.968	180.937	34.969	326.905	Unkwnown	5.25674e-21	2.32644	1	0.072984
1651	153.98	180.937	26.957	334.917	Unkwnown	5.25674e-21	1.61105	1	0.07699
1652	165.985	180.937	14.952	346.922	Unkwnown	5.21312e-21	1.20249	1	0.0829925
1653	179.929	180.937	1.008	360.866	Isotope-1	5.25674e-21	2.33397	1	0.0899645
1655	114.091	181.076	66.985	295.167	Unkwnown	0.00546663	0.317022	0.953488	0.0570455
1656	114.128	181.076	66.948	295.204	Unkwnown	0.00242236	0.852888	0.94492	0.057064
1663	114.091	181.101	67.01	295.192	Unkwnown	0.00430841	0.258132	0.914146	0.0570455
1664	114.128	181.101	66.973	295.229	Unkwnown	0.00187324	0.692954	0.90409	0.057064
1668	155.086	181.101	26.015	336.187	C2H2	0.000869187	1.05919	0.91008	0.077543
1670	181.076	181.101	0.025	362.177	Resolution	-0.000697342	0.834658	0.982761	0.090538
1681	127.136	181.159	54.023	308.295	Unkwnown	-0.00103491	0.231736	0.902877	0.063568
1685	155.142	181.159	26.017	336.301	C2H2	0.000145795	0.510249	0.940966	0.077571
1704	99.117	181.17	82.053	280.287	Unkwnown	0.00147486	0.112921	0.901358	0.0495585
1711	113.107	181.17	68.063	294.277	Unkwnown	-0.00102436	0.235131	0.93475	0.0565535
1716	127.136	181.17	54.034	308.306	Unkwnown	-0.00281247	0.252356	0.94423	0.063568
1718	128.143	181.17	53.027	309.313	Unkwnown	0.0010173	1.91715	0.92949	0.0640715
1719	139.148	181.17	42.022	320.318	Unkwnown	0.000782513	0.212138	0.906171	0.069574
1720	155.142	181.17	26.028	336.312	C2H2	-0.000939474	0.533798	0.945439	0.077571
1723	163.148	181.17	18.022	344.318	H2O	0.0019305	0.491387	0.906768	0.081574
1730	181.159	181.17	0.011	362.329	Resolution	-0.000644131	1.01383	0.973774	0.0905795
1765	183.047	183.08	0.033	366.127	Resolution	-0.000948903	2.34409	0.922173	0.0915235
1766	148.125	186.14	38.015	334.265	Unkwnown	3.32746e-06	1.02961	0.936827	0.0740625
1779	175.148	189.164	14.016	364.312	CH2	-0.00045767	1.6514	0.936281	0.087574
1782	187.148	189.164	2.016	376.312	Isotope-2	0.00314356	0.525577	0.942306	0.093574
1791	97.101	191.143	94.042	288.244	Unkwnown	-0.00342093	0.104298	0.956025	0.0485505
1795	109.076	191.143	82.067	300.219	Unkwnown	0.0010637	0.136059	0.914061	0.054538
1796	109.089	191.143	82.054	300.232	Unkwnown	0.000826004	0.110977	0.927422	0.0545445
1797	109.101	191.143	82.042	300.244	Unkwnown	0.000868873	0.105517	0.932872	0.0545505
1802	111.104	191.143	80.039	302.247	Unkwnown	-0.00132508	0.139399	0.939405	0.055552
1803	111.117	191.143	80.026	302.26	Unkwnown	-0.00125368	0.139762	0.94701	0.0555585
1805	112.112	191.143	79.031	303.255	Unkwnown	-0.00168929	1.31192	0.961463	0.056056
1807	123.092	191.143	68.051	314.235	Unkwnown	-0.00462697	0.198328	0.946689	0.061546
1808	125.096	191.143	66.047	316.239	Unkwnown	-0.00492479	0.473663	0.905829	0.062548
1809	125.107	191.143	66.036	316.25	Unkwnown	-0.00343242	0.324502	0.935422	0.0625535
1810	125.12	191.143	66.023	316.263	Unkwnown	-0.00222726	0.276004	0.937491	0.06256
1813	139.148	191.143	51.995	330.291	Unkwnown	-0.000494289	0.539913	0.905835	0.069574
1814	149.096	191.143	42.047	340.239	Unkwnown	0.00120406	0.616196	0.907634	0.074548
1819	166.135	191.143	25.008	357.278	Unkwnown	0.00849043	3.98602	0.970898	0.0830675
1822	178.123	191.143	13.02	369.266	Unkwnown	0.0113375	5.47606	0.939793	0.0890615
1824	179.128	191.143	12.015	370.271	C	0.00332482	1.09684	0.977865	0.089564
1825	180.151	191.143	10.992	371.294	Unkwnown	0.00945972	3.07473	0.969858	0.0900755
1849	109.065	193.122	84.057	302.187	Unkwnown	-0.000484639	0.0825552	0.900448	0.0545325
1850	109.076	193.122	84.046	302.198	Unkwnown	-0.000597211	0.047027	0.913954	0.054538
1851	109.089	193.122	84.033	302.211	Unkwnown	-0.000580288	0.0380008	0.918358	0.0545445
1852	109.101	193.122	84.021	302.223	Unkwnown	-0.000581585	0.0361861	0.925023	0.0545505
1861	123.092	193.122	70.03	316.214	Unkwnown	-0.00271278	0.069363	0.958668	0.061546
1866	149.096	193.122	44.026	342.218	Unkwnown	-0.000917005	0.22044	0.941002	0.074548
1870	166.135	193.122	26.987	359.257	Unkwnown	0.00238475	1.30624	0.922337	0.0830675
1873	178.123	193.122	14.999	371.245	Unkwnown	0.00306414	1.86296	0.927013	0.0890615
1874	179.107	193.122	14.015	372.229	CH2	-0.000739627	1.05654	0.912195	0.0895535
1875	179.128	193.122	13.994	372.25	CH2	0.000408335	0.370429	0.957176	0.089564
1876	180.151	193.122	12.971	373.273	Unkwnown	0.00267021	1.01206	0.925341	0.0900755
1878	191.143	193.122	1.979	384.265	Isotope-2	-0.00037859	0.327103	0.948039	0.0955715
1884	97.101	194.154	97.053	291.255	Unkwnown	-0.00273417	0.0268918	0.921537	0.0485505
1888	109.089	194.154	85.065	303.243	Unkwnown	-0.00179692	0.0291821	0.911203	0.0545445
1889	109.101	194.154	85.053	303.255	Unkwnown	-0.00183369	0.0279112	0.921902	0.0545505
1894	111.104	194.154	83.05	305.258	Unkwnown	-0.00215886	0.0357943	0.901972	0.055552
1895	111.117	194.154	83.037	305.271	Unkwnown	-0.00218833	0.0360907	0.914395	0.0555585
1897	112.112	194.154	82.042	306.266	Unkwnown	-0.00233146	0.339983	0.931884	0.056056
1899	123.092	194.154	71.062	317.246	Unkwnown	-0.00331772	0.0526272	0.939003	0.061546
1904	149.096	194.154	45.058	343.25	Unkwnown	-0.00201499	0.168463	0.928002	0.074548
1907	166.135	194.154	28.019	360.289	C2H4	0.000191231	1.05285	0.959205	0.0830675
1910	178.123	194.154	16.031	372.277	Unkwnown	0.000914563	1.45416	0.933626	0.0890615
1912	179.128	194.154	15.026	373.282	Unkwnown	-0.00122755	0.29182	0.97307	0.089564
1913	180.151	194.154	14.003	374.305	CH2	0.000383233	0.821023	0.968593	0.0900755
1915	191.143	194.154	3.011	385.297	Isotope-3	-0.00190575	0.259531	0.970688	0.0955715
1916	193.122	194.154	1.032	387.276	Isotope-1	-0.0010726	0.739974	0.954736	0.096561
1935	183.08	197.132	14.052	380.212	CH2	-0.00311565	1.02728	0.92284	0.09154
1936	187.148	197.132	9.984	384.28	Unkwnown	0.00222923	0.627484	0.970078	0.093574
1945	183.047	199.148	16.101	382.195	Unkwnown	0.00117264	1.30975	0.918663	0.0915235
1955	183.08	201.139	18.059	384.219	H2O	-0.00296731	1.25952	0.916534	0.09154
1956	187.148	201.139	13.991	388.287	CH2	0.00343041	0.789643	0.988737	0.093574
1957	189.164	201.139	11.975	390.303	C	-0.000254654	1.3577	0.947833	0.094582
1958	197.132	201.139	4.007	398.271	Isotope-4	0.000997713	1.20548	0.976438	0.098566
1961	187.148	201.233	14.085	388.381	CH2	-0.000972544	0.244778	0.960073	0.093574
1963	197.132	201.233	4.101	398.365	Isotope-4	-0.0017221	0.373036	0.946298	0.098566
1964	201.139	201.233	0.094	402.372	Resolution	-0.00199711	0.305893	0.957944	0.10057
1998	175.148	203.154	28.006	378.302	C2H4	-0.000938263	2.74278	0.906934	0.087574
2001	187.148	203.154	16.006	390.302	Unkwnown	0.00468147	0.920092	0.961768	0.093574
2002	189.164	203.154	13.99	392.318	CH2	-0.000348101	1.68458	0.98225	0.094582
2003	197.132	203.154	6.022	400.286	Unkwnown	0.00221234	1.3527	0.914757	0.098566
2004	201.139	203.154	2.015	404.293	Isotope-2	0.000716178	1.16184	0.970097	0.10057
2005	201.233	203.154	1.921	404.387	Isotope-2	0.00863813	3.42566	0.912954	0.100616
2022	189.164	204.187	15.023	393.351	Unkwnown	-0.00210959	0.485457	0.958518	0.094582
2024	201.139	204.187	3.048	405.326	Isotope-3	-0.0016995	0.323912	0.915853	0.10057
2026	203.086	204.187	1.101	407.273	Isotope-1	7.17841e-06	1.61834	0.900881	0.101543
2027	203.154	204.187	1.033	407.341	Isotope-1	-0.0019816	0.285817	0.968017	0.101577
2031	95.086	205.157	110.071	300.243	Unkwnown	-0.000175137	0.0946415	0.917368	0.047543
2035	109.065	205.157	96.092	314.222	Unkwnown	-0.0027303	0.289175	0.916175	0.0545325
2036	109.076	205.157	96.081	314.233	Unkwnown	-0.00347953	0.166306	0.938563	0.054538
2037	109.089	205.157	96.068	314.246	Unkwnown	-0.00323641	0.133726	0.93856	0.0545445
2038	109.101	205.157	96.056	314.258	Unkwnown	-0.00281663	0.125884	0.934893	0.0545505
2040	110.073	205.157	95.084	315.23	Unkwnown	-0.00180592	1.71347	0.924256	0.0550365
2041	110.084	205.157	95.073	315.241	Unkwnown	-0.00163328	1.18162	0.934149	0.055042
2042	110.109	205.157	95.048	315.266	Unkwnown	-0.00100409	1.01542	0.938509	0.0550545
2048	123.092	205.157	82.065	328.249	Unkwnown	-0.00770709	0.227496	0.914937	0.061546
2053	149.096	205.157	56.061	354.253	Unkwnown	-0.00269089	0.740688	0.91958	0.074548
2073	95.086	205.195	110.109	300.281	Unkwnown	-0.00162752	0.109888	0.916672	0.047543
2077	109.065	205.195	96.13	314.26	Unkwnown	-0.00452197	0.335189	0.914309	0.0545325
2078	109.076	205.195	96.119	314.271	Unkwnown	-0.00554234	0.193446	0.940088	0.054538
2079	109.089	205.195	96.106	314.284	Unkwnown	-0.00529331	0.15567	0.94093	0.0545445
2080	109.101	205.195	96.094	314.296	Unkwnown	-0.00480505	0.146543	0.937336	0.0545505
2082	110.073	205.195	95.122	315.268	Unkwnown	-0.0034038	1.98388	0.921158	0.0550365
2083	110.084	205.195	95.111	315.279	Unkwnown	-0.00332486	1.37213	0.933767	0.055042
2084	110.109	205.195	95.086	315.304	Unkwnown	-0.00265097	1.18078	0.939472	0.0550545
2090	123.092	205.195	82.103	328.287	Unkwnown	-0.010077	0.262528	0.909242	0.061546
2095	149.096	205.195	56.099	354.291	Unkwnown	-0.00432992	0.855585	0.914515	0.074548
2111	205.157	205.195	0.038	410.352	Resolution	-0.00135666	1.15911	0.997757	0.102579
2118	183.08	211.148	28.068	394.228	C2H4	-0.00201791	0.675623	0.921507	0.09154
2119	187.148	211.148	24	398.296	Unkwnown	0.00159782	0.399574	0.937987	0.093574
2121	197.132	211.148	14.016	408.28	CH2	0.00012967	0.643695	0.977179	0.098566
2122	201.139	211.148	10.009	412.287	Unkwnown	-0.000184926	0.510965	0.957692	0.10057
2123	201.233	211.148	9.915	412.381	Unkwnown	0.00327845	1.52938	0.914652	0.100616
2144	116.143	228.269	112.126	344.412	Unkwnown	5.64538e-08	2.15637	0.974519	0.0580715
2145	127.903	228.269	100.366	356.172	Unkwnown	5.64538e-08	7.42538	0.974519	0.0639515
2147	144.175	228.269	84.094	372.444	Unkwnown	5.64538e-08	1.63215	0.974519	0.0720875
2148	145.962	228.269	82.307	374.231	Unkwnown	5.64538e-08	7.10968	0.974519	0.072981
2149	145.968	228.269	82.301	374.237	Unkwnown	5.64538e-08	5.07879	0.974519	0.072984
2150	153.98	228.269	74.289	382.249	Unkwnown	5.64538e-08	3.51703	0.974519	0.07699
2151	165.985	228.269	62.284	394.254	Unkwnown	5.64538e-08	2.62512	0.974519	0.0829925
2152	179.929	228.269	48.34	408.198	Unkwnown	5.64538e-08	5.09523	0.974519	0.0899645
2153	180.937	228.269	47.332	409.206	Unkwnown	5.64538e-08	2.18308	0.974519	0.0904685
2169	181.17	239.179	58.009	420.349	Unkwnown	-0.00198337	0.444906	0.900601	0.090585
2177	116.143	330.848	214.705	446.991	Unkwnown	4.02435e-21	0.482653	1	0.0580715
2178	127.903	330.848	202.945	458.751	Unkwnown	4.02435e-21	1.662	1	0.0639515
2180	144.175	330.848	186.673	475.023	Unkwnown	4.03526e-21	0.36532	1	0.0720875
2181	145.962	330.848	184.886	476.81	Unkwnown	4.02435e-21	1.59134	1	0.072981
2182	145.968	330.848	184.88	476.816	Unkwnown	4.03526e-21	1.13677	1	0.072984
2183	153.98	330.848	176.868	484.828	Unkwnown	4.02435e-21	0.787208	1	0.07699
2184	165.985	330.848	164.863	496.833	Unkwnown	4.00254e-21	0.587573	1	0.0829925
2185	179.929	330.848	150.919	510.777	Unkwnown	4.02435e-21	1.14045	1	0.0899645
2186	180.937	330.848	149.911	511.785	Unkwnown	4.02435e-21	0.488631	1	0.0904685
2187	228.269	330.848	102.579	559.117	Unkwnown	-9.24551e-09	0.212566	0.974519	0.114134
2188	116.143	331.851	215.708	447.994	Unkwnown	-3.59901e-22	0.133618	1	0.0580715
2189	127.903	331.851	203.948	459.754	Unkwnown	-3.59901e-22	0.460109	1	0.0639515
2191	144.175	331.851	187.676	476.026	Unkwnown	-3.57175e-22	0.101135	1	0.0720875
2192	145.962	331.851	185.889	477.813	Unkwnown	-3.62628e-22	0.440547	1	0.072981
2193	145.968	331.851	185.883	477.819	Unkwnown	-3.59901e-22	0.314704	1	0.072984
2194	153.98	331.851	177.871	485.831	Unkwnown	-3.59901e-22	0.217931	1	0.07699
2195	165.985	331.851	165.866	497.836	Unkwnown	-3.65354e-22	0.162664	1	0.0829925
2196	179.929	331.851	151.922	511.78	Unkwnown	-3.57175e-22	0.315723	1	0.0899645
2197	180.937	331.851	150.914	512.788	Unkwnown	-3.59901e-22	0.135273	1	0.0904685
2198	228.269	331.851	103.582	560.12	Unkwnown	-2.55953e-09	0.0588469	0.974519	0.114134
2199	330.848	331.851	1.003	662.699	Isotope-1	-3.57175e-22	0.27684	1	0.165424
