# Supplementary material for: Volatile organic compound fluxes over a winter wheat field byPTR-Qi-TOF-MS and eddy covariance
Source: Copernicus journal article supplement (doi:10.5194/acp-2020-1328), 2021-01-13
Supplement: Supplementary file 2 [file acp-2020-1328-supplement.zip]

Archive with 5 entries (5 files):
- COV3ER_2016_dataset-Correlation-Analysis.0.9.EN130.xlsx
- COV3ER_2016_dataset-Correlation-Analysis.0.9.EN150.xlsx
- COV3ER_2016_dataset-Correlation-Analysis.0.99.csv
- Loubet-COV3ER-wheat-2016-EC-Supp.Mat-VF.pdf
- Loubet-COV3ER-wheat-2016-EC-synthesis-fluxes-VF.xlsx
