# Supplementary material for: Volatile organic compound fluxes over a winter wheat field byPTR-Qi-TOF-MS and eddy covariance
Source: Copernicus journal article supplement (doi:10.5194/acp-2020-1328), 2021-01-13
Supplement: Supplementary file 2 [file acp-2020-1328-supplement.zip › COV3ER_2016_dataset-Correlation-Analysis.0.99.csv]

	X	Mass1	Mass2	MassDifference	MassSum	CorrelationType	intercept	slope	corr	resolution
20	20	33.033	33.045	0.012	66.078	Resolution	-0.07	0.76	0.99	0.02
28	28	47.049	47.060	0.011	94.109	Resolution	0.00	0.86	1.00	0.02
35	35	57.070	69.070	12.000	126.140	C	-0.05	0.71	0.99	0.03
42	42	71.086	85.101	14.015	156.187	CH2	0.00	0.61	1.00	0.04
43	43	71.086	86.096	15.010	157.182	Unkwnown	0.00	0.05	0.99	0.04
45	45	85.101	86.096	0.995	171.197	Isotope-1	0.00	0.08	0.99	0.04
46	46	89.042	89.060	0.018	178.102	Resolution	-0.01	1.21	0.99	0.04
47	47	91.039	91.050	0.011	182.089	Resolution	0.00	1.17	1.00	0.05
48	48	91.039	91.058	0.019	182.097	Resolution	0.00	1.22	1.00	0.05
49	49	91.050	91.058	0.008	182.108	Resolution	0.00	1.04	1.00	0.05
53	53	93.033	94.041	1.008	187.074	Isotope-1	0.01	0.07	0.99	0.05
155	1	93.033	93.070	0.037	186.103	Resolution	NA	NA	NA	NA
156	2	94.041	93.070	-0.971	187.111	Resolution	NA	NA	NA	NA
75	75	97.101	111.104	14.003	208.205	CH2	0.02	0.65	0.99	0.05
76	76	97.101	111.117	14.016	208.218	CH2	0.01	0.69	1.00	0.05
100	100	97.101	125.120	28.019	222.221	C2H4	0.01	0.33	0.99	0.05
57	57	99.092	99.104	0.012	198.196	Resolution	0.00	1.08	0.99	0.05
58	58	99.104	99.117	0.013	198.221	Resolution	0.00	0.95	0.99	0.05
59	59	104.047	104.049	0.002	208.096	Resolution	0.00	1.02	1.00	0.05
60	60	104.047	104.062	0.015	208.109	Resolution	0.00	1.03	1.00	0.05
61	61	104.049	104.062	0.013	208.111	Resolution	0.00	1.01	1.00	0.05
64	64	109.065	109.076	0.011	218.141	Resolution	0.00	1.78	0.99	0.05
65	65	109.076	109.089	0.013	218.165	Resolution	0.00	1.25	1.00	0.05
66	66	109.076	109.101	0.025	218.177	Resolution	-0.01	1.32	0.99	0.05
68	68	109.076	110.084	1.008	219.160	Isotope-1	0.00	0.13	0.99	0.05
67	67	109.089	109.101	0.012	218.190	Resolution	-0.01	1.07	1.00	0.05
69	69	109.089	110.084	0.995	219.173	Isotope-1	0.00	0.11	0.99	0.05
71	71	109.101	110.109	1.008	219.210	Isotope-1	0.00	0.12	0.99	0.05
70	70	110.073	110.084	0.011	220.157	Resolution	0.00	1.43	1.00	0.06
72	72	110.084	110.109	0.025	220.193	Resolution	0.00	1.19	0.99	0.06
77	77	111.104	111.117	0.013	222.221	Resolution	-0.01	1.04	0.99	0.06
80	80	111.104	112.112	1.008	223.216	Isotope-1	0.00	0.11	0.99	0.06
94	94	111.104	125.107	14.003	236.211	CH2	0.01	0.43	0.99	0.06
101	101	111.104	125.120	14.016	236.224	CH2	0.00	0.50	0.99	0.06
95	95	111.117	125.107	13.990	236.224	CH2	0.01	0.41	0.99	0.06
102	102	111.117	125.120	14.003	236.237	CH2	0.01	0.48	1.00	0.06
96	96	112.112	125.107	12.995	237.219	Unkwnown	0.01	3.95	0.99	0.06
103	103	112.112	125.120	13.008	237.232	Unkwnown	0.00	4.62	0.99	0.06
106	106	113.107	127.136	14.029	240.243	CH2	0.00	1.01	0.99	0.06
107	107	116.143	127.903	11.760	244.046	Unkwnown	0.00	0.70	1.00	0.06
119	119	116.143	153.980	37.837	270.123	Unkwnown	0.00	0.93	1.00	0.06
147	147	116.143	331.851	215.708	447.994	Unkwnown	0.00	1.15	1.00	0.06
81	81	117.070	117.078	0.008	234.148	Resolution	0.00	1.05	1.00	0.06
82	82	117.078	117.091	0.013	234.169	Resolution	0.00	1.00	1.00	0.06
83	83	117.091	117.102	0.011	234.193	Resolution	0.00	0.95	0.99	0.06
84	84	118.078	118.081	0.003	236.159	Resolution	0.00	0.94	0.99	0.06
85	85	119.060	119.086	0.026	238.146	Resolution	0.00	1.30	1.00	0.06
87	87	121.089	121.101	0.012	242.190	Resolution	0.00	0.99	1.00	0.06
88	88	124.039	124.057	0.018	248.096	Resolution	0.00	1.11	0.99	0.06
98	98	125.096	125.107	0.011	250.203	Resolution	0.00	1.46	1.00	0.06
105	105	125.107	125.120	0.013	250.227	Resolution	0.00	1.17	1.00	0.06
115	115	125.107	139.148	14.041	264.255	CH2	0.00	0.54	0.99	0.06
116	116	125.120	139.148	14.028	264.268	CH2	0.00	0.46	0.99	0.06
120	120	127.903	153.980	26.077	281.883	C2H2	0.00	1.33	1.00	0.06
148	148	127.903	331.851	203.948	459.754	Unkwnown	0.00	1.66	1.00	0.06
108	108	129.045	129.070	0.025	258.115	Resolution	0.00	1.43	0.99	0.06
109	109	129.070	129.091	0.021	258.161	Resolution	0.00	0.94	0.99	0.06
112	112	135.080	135.117	0.037	270.197	Resolution	-0.01	1.74	1.00	0.07
117	117	145.962	145.968	0.006	291.930	Resolution	0.00	1.02	1.00	0.07
118	118	146.970	146.976	0.006	293.946	Resolution	0.00	1.00	1.00	0.07
149	149	153.980	331.851	177.871	485.831	Unkwnown	0.00	1.24	1.00	0.08
121	121	163.123	163.136	0.013	326.259	Resolution	0.00	1.03	1.00	0.08
122	122	163.136	163.148	0.012	326.284	Resolution	0.00	1.00	1.00	0.08
125	125	167.070	167.086	0.016	334.156	Resolution	0.00	0.80	1.00	0.08
128	128	180.151	194.154	14.003	374.305	CH2	0.00	0.87	0.99	0.09
132	132	205.157	205.195	0.038	410.352	Resolution	0.00	1.18	1.00	0.10
133	133	223.000	224.000	1.000	447.000	Isotope-1	0.01	0.23	1.00	0.11
134	134	223.000	225.000	2.000	448.000	Isotope-2	-0.02	0.98	1.00	0.11
136	136	223.000	226.000	3.000	449.000	Isotope-3	0.00	0.21	1.00	0.11
135	135	224.000	225.000	1.000	449.000	Isotope-1	-0.05	4.24	0.99	0.11
137	137	224.000	226.000	2.000	450.000	Isotope-2	-0.01	0.90	1.00	0.11
138	138	225.000	226.000	1.000	451.000	Isotope-1	0.01	0.21	1.00	0.11
140	140	257.000	259.000	2.000	516.000	Isotope-2	0.01	0.63	0.99	0.13
141	141	297.000	298.000	1.000	595.000	Isotope-1	0.00	0.34	1.00	0.15
142	142	297.000	299.000	2.000	596.000	Isotope-2	-0.02	3.33	0.99	0.15
144	144	297.000	300.000	3.000	597.000	Isotope-3	0.00	0.96	0.99	0.15
143	143	298.000	299.000	1.000	597.000	Isotope-1	-0.05	9.82	0.99	0.15
145	145	298.000	300.000	2.000	598.000	Isotope-2	-0.01	2.83	0.99	0.15
146	146	299.000	300.000	1.000	599.000	Isotope-1	0.00	0.29	1.00	0.15
150	150	355.000	356.000	1.000	711.000	Isotope-1	0.00	0.38	1.00	0.18
151	151	355.000	357.000	2.000	712.000	Isotope-2	0.00	0.31	0.99	0.18
152	152	356.000	357.000	1.000	713.000	Isotope-1	0.00	0.80	0.99	0.18
153	153	371.000	372.000	1.000	743.000	Isotope-1	0.00	0.41	0.99	0.19
154	154	429.000	430.000	1.000	859.000	Isotope-1	0.00	0.46	0.99	0.21
