# Supplementary material for: Volatile organic compound fluxes over a winter wheat field byPTR-Qi-TOF-MS and eddy covariance
Source: Copernicus journal article supplement (doi:10.5194/acp-2020-1328), 2021-01-13
Supplement: Supplementary file 2 [file acp-2020-1328-supplement.zip › Loubet-COV3ER-wheat-2016-EC-synthesis-fluxes-VF.xlsx]

## Sheet: Read me
Copyright INRAE. Benjamin.Loubet@inrae.fr
Variable	Signification	units
IonMassmeasured	m/z measured	g mol-1
ExactIonMass	exact ion mass corresponding to the raw formula	g mol-1
uncertaintymasses	uncertainty on m/z due to resolution	g mol-1
Raw.formula	chemical formula best guess	-
Tentative.identification	tentative compound identification	-
Chemical.class	oxygen, nitrogen etc	-
meanMixingRatio	mean mixing ratio over the entire campaign	ppb
meanflux	mean flux over the entire campaign	nmol m-2 s-1
lod_flux	flux limit of detection over the entire campaign	nmol m-2 s-1
meanfluxugm2h	mean flux over the entire campaign	µg m-2 h-1
likelycommingfromFarm	compounds for which the mixing ratio increases significantly when wind dierction blows from the farm	-
meanMixingRatio_in_microg_m3	mean mixing ratio over the entire campaign	µg m-3
Quant0.05.MixingRatio	5% quantile mixing ratio over the entire campaign	µg m-3
Quant0.95.MixingRatio	95% quantile mixing ratio over the entire campaign	µg m-3
Quant0.05.flux	5% quantile of the flux over the entire campaign	nmol m-2 s-1
Quant0.95.flux	95% quantile of the flux over the entire campaign	nmol m-2 s-1
seflxugm2h	Standard error of the flux over the entire campaign	µg m-2 h-1
meanVd	mean deposition velocity over the entire campaign	cm s-1
Quant0.05.Vd	5% quantile of the deposition velocity over the entire campaign	cm s-1
Quant0.95.Vd	95% quantile of the deposition velocity over the entire campaign	cm s-1
summed fluxes ug m-2 h-1	fluxes of all emitted and deposted VOC summed up (emission and deposition separated)	µg m-2 h-1
% flux in mass	percentage of each ion ot the summed up flux (emission and deposition separated)	%
summed fluxes nmol m-2 s-1	fluxes of all emitted and deposted VOC summed up (emission and deposition separated)	nmol m-2 s-1
% flux in moles	percentage of each ion ot the summed up flux (emission and deposition separated)	%
flux > LODf	a boolean indicating whether the flux is larger than 3*LODf	-
number of carbon	the number of carbon in the best guessed chemical formula	#
summed fluxes ug C m-2 h-1	summed fluxes expressed per carbon mass	µg C m-2 h-1

## Sheet: table
Ion mass measured	Exact Ion Mass	uncertaintymasses	Raw.formula	Tentative.identification	Chemical.class	meanMixingRatio	meanflux	lod_flux	meanfluxugm2h	likelycommingfromFarm	meanMixingRatio_in_microg_m3	Quant0.05.MixingRatio	Quant0.95.MixingRatio	Quant0.05.flux	Quant0.95.flux	seflxugm2h	meanVd	Quant0.05.Vd	Quant0.95.Vd	summed fluxes ug m-2 h-1	% flux in mass	summed fluxes nmol m-2 s-1	% flux in moles	flux > LODf	number of carbon	summed fluxes ug C m-2 h-1
g mol-1	g mol-1	g mol-1	-	-	-	ppb	nmol m-2 s-1	nmol m-2 s-1	µg m-2 h-1	-	µg m-3	µg m-3	µg m-3	nmol m-2 s-1	nmol m-2 s-1	µg m-2 h-1	cm s-1	cm s-1	cm s-1	µg m-2 h-1	%	nmol m-2 s-1	%	-	-	µg Cm-2 h-1
33.033	33.0333	0.00471904	CH4O	Methanol	Oxygen containing compounds	3.41913	0.532079	0.00511168	63.2742	FALSE	5.04215	1.65726	6.21643	-0.326029	2.36623	4.38262	0.0178677	-0.271701	0.368383	63.2742	0.417182	0.532079	0.623066	TRUE	1	22.9858
93.033	93.0333	0.0132905	C6H4O		Oxygen containing compounds	1.65583	0.0945962	0.00120094	31.682	FALSE	6.87707	0.853009	2.83922	-0.0180018	0.347704	1.60285	-0.0469378	-0.185151	0.0138586	94.9562	0.626069	0.626675	0.733839	TRUE	6	24.5193
45.033	45.0343	0.00643347	C2H4O	Acetaldehyde	Oxygen containing compounds	0.478294	0.079947	0.00109957	12.9609	FALSE	0.961562	0.120888	1.04031	-0.0338939	0.37239	0.838729	-0.147785	-0.672666	0.114955	107.917	0.711523	0.706622	0.827457	TRUE	2	6.90742
59.049	59.0493	0.00843561	C3H6O	Acetone	Oxygen containing compounds	1.11739	0.0669227	0.00111644	14.2262	FALSE	2.94556	0.436497	2.28094	-0.010307	0.198252	0.54666	0.0241083	-1.23502	1.37661	122.143	0.80532	0.773545	0.905823	TRUE	3	8.67318
63.026	63.0263	0.00900375	C2H6S	DMS	Sulfur containing compounds	0.0557287	0.0135352	0.000260978	3.07105	FALSE	0.156802	0.0134922	0.147719	-0.0015382	0.0447949	0.173729	-0.276844	-0.933844	0.0292168	125.214	0.825568	0.78708	0.921673	TRUE	2	1.16944
111.08	111.091	0.0158702	C6H10N2		Nitrogen containing	0.0541549	0.00767433	0.000278671	3.06887	FALSE	0.26855	0.00225842	0.122518	-0.00643865	0.0325509	0.217315	0.0960848	-0.435236	0.791493	128.283	0.845801	0.794754	0.93066	TRUE	6	1.98919
95.049	95.0493	0.0135785	C6H6O	Phenol	Oxygen containing compounds	0.0878053	0.00675302	0.000435141	2.31072	TRUE	0.372581	-0.0929471	0.285322	-0.0157948	0.0407619	0.22035	0.0493454	-1.03004	1.05049	130.594	0.861037	0.801507	0.938568	TRUE	6	1.75038
113.015	113.014	0.0161449	C6H5Cl	chlorobenzene	Halogeneous	0.050731	0.00622957	0.000191675	2.53452	FALSE	0.255954	0.0192766	0.0994849	-0.00483001	0.0268581	0.173722	-0.0212477	-1.31505	1.20717	133.129	0.877747	0.807737	0.945862	TRUE	6	1.6147
	113.023	0.0161462	C5H4O3		Oxygen containing compounds															133.129	0.877747	0.807737	0.945862	FALSE	5	0
47.049	47.0493	0.00672133	C2H6O	Ethanol (can also be dimethyl ether)	Oxygen containing compounds	0.0403214	0.00533763	0.000274051	0.904068	FALSE	0.0846912	0.00864536	0.0833062	-0.00811637	0.030309	0.103371	-0.00838609	-1.22535	1.17519	134.033	0.883708	0.813075	0.952113	TRUE	2	0.461171
126						0.0697313	0.00400764	0.000224718	1.81786	FALSE	0.392238	0.0302108	0.11137	-0.00698271	0.0213894	0.159593	-0.0450092	-0.261975	0.115689	135.85	0.895694	0.817082	0.956806	TRUE		0
113.06	113.059	0.0161513	C6H8O2	detected by Park et al 2013	Oxygen containing	0.0203037	0.00378688	0.000177535	1.54132	FALSE	0.10248	-0.00133285	0.0496299	-0.00455978	0.0176392	0.112175	0.0152874	-0.220554	0.308645	137.392	0.905856	0.820869	0.96124	TRUE	6	0.981559
60						0.0604788	0.00339209	0.000308449	0.732691	FALSE	0.161997	0.0270861	0.11413	-0.0111428	0.0207013	0.0806211	0.00959647	-0.245048	0.253272	138.124	0.910687	0.824261	0.965212	TRUE		0
167.07	167.085	0.0238693	C13H10			0.0717517	0.00315279	0.000212231	1.89625	FALSE	0.535159	0.0332285	0.119411	-0.00732589	0.0190107	0.188268	0.00282795	-0.823793	0.806612	140.021	0.923189	0.827414	0.968904	TRUE	13	1.77061
	167.052	0.0238646	C9H10OS		Sulfur containing compounds															140.021	0.923189	0.827414	0.968904	FALSE	9	0
	167.07	0.0238672	C9H10O3		Oxygen containing compounds															140.021	0.923189	0.827414	0.968904	FALSE	9	0
73.065	73.0653	0.0104379	C4H8O	1 propene 2 methoxy 2-butanone Butanone/Butal	Oxygen containing compounds	0.116731	0.0029302	0.000317825	0.770743	FALSE	0.380756	0.0430028	0.22749	-0.0123944	0.027532	0.117345	-0.0167425	-0.688396	0.640936	140.791	0.928271	0.830344	0.972336	TRUE	4	0.506339
59.086	59.0853	0.00844075	C4H10	Isobutane Butane	Hydrocarbons	0.0478259	0.00261776	0.000266886	0.556823	FALSE	0.126154	0.0208516	0.0829552	-0.009403	0.0166928	0.0680967	-0.0470023	-0.314587	0.21152	141.348	0.931942	0.832962	0.975401	TRUE	4	0.452349
91.05	91.0543	0.0130078	C7H6 C4H10S C2H6N2O2		Hydrocarbons	0.0732874	0.00242912	0.000268396	0.796215	FALSE	0.297894	0.0138667	0.149676	-0.0117998	0.0215397	0.127286	-0.0256006	-0.274573	0.184853	142.144	0.937192	0.835391	0.978245	TRUE	7	0.734564
	91.0493	0.013007	C2H6N2O2		Nitrogen containing															142.144	0.937192	0.835391	0.978245	FALSE	2	0
	91.0383	0.0130055	C3H6O3	fragment PPN (peroxypropionic nitric anhydrid)	Oxygen containing															142.144	0.937192	0.835391	0.978245	FALSE	3	0
	91.0593	0.0130085	H10O5.H2O		Oxygen containing															142.144	0.937192	0.835391	0.978245	FALSE	0	0
40						0.0935574	0.00178296	0.000528216	0.256746	FALSE	0.167067	0.0356387	0.14039	-0.0239531	0.0327751	0.0973665	0.00205258	-0.247052	0.224984	142.401	0.938885	0.837174	0.980333	TRUE		0
112.052						0.00880071	0.00144555	9.52695e-05	0.583116	FALSE	0.044024	0.00189888	0.0197983	-0.00313802	0.0085121	0.0609313	-0.16539	-0.980058	0.395134	142.984	0.942729	0.83862	0.982026	TRUE		0
87.08	87.0803	0.01244	C5H10O	Butal-3-methyl Allyl ethyl ether Pentanone Pental Pental Pentanone Methyl butenol MBO (methyl butenol) trÅ s reactif avec OH	Oxygen containing compounds	0.012315	0.00134234	0.00010393	0.420807	FALSE	0.0478747	0.00339363	0.0263005	-0.00316132	0.00757702	0.044854	-0.0940494	-0.622755	0.330988	143.405	0.945504	0.839962	0.983598	TRUE	5	0.289945
169						0.0263312	0.00126183	0.00020746	0.767698	FALSE	0.198659	-0.00340879	0.0606011	-0.00923084	0.0143129	0.160095	-0.0157325	-0.720167	0.656673	144.173	0.950565	0.841224	0.985076	TRUE		0
114.091	114.091	0.0162988	C6H11NO		Nitrogen containing compounds	0.019374	0.00114753	0.000156828	0.471322	FALSE	0.0986785	0.00367578	0.0350858	-0.0062178	0.0100546	0.0756797	0.0304677	-1.24806	1.27284	144.644	0.953673	0.842371	0.986419	TRUE	6	0.29744
223						0.0727055	0.00106894	0.000274068	0.858147	FALSE	0.723809	0.00711256	0.181388	-0.0130605	0.0151237	0.274602	0.0211655	-0.865388	0.936643	145.502	0.959331	0.84344	0.987671	TRUE		0
49.011	49.0103	0.00700147	CH4S	Methanethiol	Sulfur containing compounds	0.0257626	0.000845559	0.000126687	0.14919	FALSE	0.0563682	0.00663528	0.06924	-0.0064705	0.0090194	0.0322279	-0.0590236	-0.476432	0.282555	145.652	0.960314	0.844286	0.988661	TRUE	1	0.0365281
68.07	68.07	0.00972133	C5H8	CH5H8+	Hydrocarbons	0.00701801	0.000818039	9.14893e-05	0.2004	FALSE	0.02132	0.0025044	0.0129217	-0.00342612	0.00641916	0.0270797	-0.0993346	-0.768655	0.484126	145.852	0.961636	0.845104	0.989619	TRUE	5	0.176696
257	257.02	0.0367172	C6H10N4O3Cl2		Hallogen containing compounds	0.0152438	0.000724674	0.000181188	0.670469	FALSE	0.174895	0.00121481	0.0338982	-0.00870064	0.00994263	0.191916	-0.0221	-0.539916	0.571111	146.522	0.966056	0.845829	0.990468	TRUE	6	0.187836
190						0.0127373	0.000699494	0.000148874	0.478454	FALSE	0.108039	0.00331362	0.0243656	-0.00732443	0.0091578	0.132315	-0.0512999	-0.565459	0.448426	147.001	0.969211	0.846528	0.991287	TRUE		0
171						0.00726327	0.000587478	0.000111924	0.361652	FALSE	0.0554473	0.00105792	0.0157602	-0.0053791	0.00656843	0.0921408	0.00121915	-0.451106	0.443483	147.362	0.971595	0.847116	0.991975	TRUE		0
115.075	115.075	0.0164393	C6H10O2	hexenoic acid	Oxygen containing compounds	0.00739689	0.000548515	8.80209e-05	0.227233	FALSE	0.0379999	0.00200469	0.0169228	-0.0031721	0.00502615	0.0442045	0.0975158	-0.474309	0.765009	147.59	0.973093	0.847664	0.992617	TRUE	6	0.142175
199.148	199.169	0.0284528	C12H22O2		Oxygen containing compounds	0.00509059	0.0004857	5.24077e-05	0.348214	FALSE	0.0452581	0.000930407	0.0222734	-0.0020292	0.00386934	0.0707028	-0.031162	-0.742934	0.698609	147.938	0.975389	0.84815	0.993186	TRUE	12	0.251787
	199.147	0.0284496	C15H18																	147.938	0.975389	0.84815	0.993186	FALSE	15	0
65.02	65.0223	0.0092889	CH4O3		Oxygen containing	0.00655912	0.000434981	7.95656e-05	0.101817	FALSE	0.019039	0.00337679	0.0119668	-0.00345206	0.00513141	0.023612	-0.077656	-0.769984	0.48849	148.04	0.976061	0.848585	0.993695	TRUE	1	0.0187912
65.02	65.0193	0.00928847	C2H2F2			0.00655912	0.000434981	7.95656e-05	0.101817	FALSE	0.019039	0.00337679	0.0119668	-0.00345206	0.00513141	0.023612	-0.077656	-0.769984	0.48849	148.142	0.976732	0.84902	0.994205	TRUE	2	0.0375824
247						0.00634814	0.000366308	9.83507e-05	0.325721	FALSE	0.0699996	0.000158496	0.0143845	-0.00423246	0.00579565	0.107638	-0.0144976	-1.05591	0.967622	148.467	0.978879	0.849386	0.994634	TRUE		0
156						0.0104543	0.0003642	8.78621e-05	0.204535	FALSE	0.0728064	0.0019725	0.024745	-0.00778835	0.00852644	0.100128	-0.0470023	-0.314587	0.21152	148.672	0.980228	0.84975	0.99506	TRUE		0
129.07	129.07	0.0184386	C10H8	phtalene	Hydrocarbons	0.00660277	0.000348689	8.00934e-05	0.162019	FALSE	0.0380455	0.00225616	0.0138736	-0.00367125	0.00481299	0.0497989	-0.0583041	-0.742686	0.555095	148.834	0.981296	0.850099	0.995468	TRUE	10	0.150634
112.007						0.00234067	0.000331839	4.04308e-05	0.133806	FALSE	0.0117041	0.000661993	0.00528331	-0.00140195	0.00269454	0.0227963	-0.101491	-0.959654	0.660016	148.968	0.982178	0.850431	0.995857	TRUE		0
170						0.00541224	0.000320234	9.40592e-05	0.195983	FALSE	0.041075	0.001688	0.0102683	-0.00460792	0.00513048	0.0667733	-0.0590236	-0.476432	0.282555	149.164	0.983471	0.850751	0.996232	TRUE		0
115.112	115.111	0.0164445	C7H14O	Heptal	Oxygen containing compounds	0.00407316	0.000279882	6.07768e-05	0.115984	FALSE	0.0209317	0.00152505	0.00863796	-0.00229825	0.00363369	0.0310723	-0.0534695	-0.792557	0.606655	149.28	0.984235	0.851031	0.99656	TRUE	7	0.0846362
	115.122	0.016446	C6H14N2		Nitrogen containing															149.28	0.984235	0.851031	0.99656	FALSE	6	0
181.101	181.122	0.0258746	C11H16O2		Oxygen containing compounds	0.00489363	0.000267723	8.7617e-05	0.174546	FALSE	0.0395643	0.00115514	0.0107204	-0.00406055	0.00458655	0.0677817	0.0158812	-0.703695	0.791272	149.454	0.985386	0.851299	0.996873	TRUE	11	0.127222
155.107						0.00425894	0.000250927	7.7536e-05	0.140114	FALSE	0.0294907	0.000704446	0.00997277	-0.00385423	0.00450253	0.0543759	0.0310155	-0.234589	0.329065	149.594	0.98631	0.85155	0.997167	TRUE		0
129.091	129.091	0.0184416	C7H12O2	heptenoic acid	Oxygen containing compounds	0.00613232	0.000246221	7.36722e-05	0.114426	FALSE	0.0353405	0.00191099	0.0132492	-0.00341254	0.00421959	0.0458158	-0.0602022	-1.27501	1.03006	149.709	0.987064	0.851796	0.997455	TRUE	7	0.0744574
181.076	181.075	0.0258679	C12H8N2		Nitrogen containing	0.00573821	0.000226648	9.54697e-05	0.147746	FALSE	0.0463863	0.000831884	0.0119278	-0.00386775	0.00522752	0.0766781	0.187567	-0.474853	1.04572	149.856	0.988039	0.852022	0.997721	FALSE	12	0.117494
	181.084	0.0258692	C10H12O3		Oxygen containing															149.856	0.988039	0.852022	0.997721	FALSE	10	0
	181.1	0.0258715	C14H12																	149.856	0.988039	0.852022	0.997721	FALSE	14	0
115.123						0.0027272	0.000211124	4.28494e-05	0.087499	FALSE	0.0140162	0.00119073	0.00533327	-0.00163928	0.00237576	0.0200957	0.0560093	-0.519617	0.705949	149.944	0.988615	0.852233	0.997968	TRUE		0
153.07	153.091	0.0218702	C9H12O2	2 6 6-Trimethyl-2-cyclohexene- 1 4-dione	Oxygen containing compounds	0.00639988	0.000196529	6.79096e-05	0.108297	FALSE	0.0437335	0.00196599	0.0140958	-0.00330917	0.00407174	0.0506978	-0.0401242	-0.66027	0.53079	150.052	0.989329	0.85243	0.998198	FALSE	9	0.0764103
241						0.00294555	0.00019333	7.46741e-05	0.167733	FALSE	0.031691	0.000749209	0.00528896	-0.00334317	0.00419496	0.075641	-0.0602022	-1.27501	1.03006	150.22	0.990435	0.852623	0.998424	FALSE		0
373						0.0048574	0.000184944	8.14821e-05	0.248343	FALSE	0.0808843	0.00135365	0.00909818	-0.0040254	0.00497289	0.141922	-0.0232339	-1.12834	0.917651	150.468	0.992073	0.852808	0.998641	FALSE		0
143						0.00674372	0.000183147	9.27865e-05	0.0942842	FALSE	0.0430514	0.00189238	0.0159829	-0.0049373	0.00552001	0.0613206	-0.0228213	-0.381678	0.322966	150.563	0.992694	0.852991	0.998856	FALSE		0
303						0.0020182	0.000126438	6.01862e-05	0.137918	FALSE	0.0272998	0.000295977	0.00363561	-0.00312743	0.00346975	0.0829774	-0.0135066	-0.821185	0.768849	150.701	0.993604	0.853118	0.999004	FALSE		0
80.049	80.0493	0.0114356	C5H5N	Pyridine	Nitrogen containing compounds	0.00763536	0.000124667	8.13359e-05	0.0359262	FALSE	0.0272858	0.00275605	0.0177444	-0.0037659	0.0040154	0.0291748	0.0128671	-1.49436	1.31189	150.736	0.993841	0.853243	0.99915	FALSE	5	0.0269282
	80.0573	0.0114368	C6H613C																	150.736	0.993841	0.853243	0.99915	FALSE	6	0
374						0.0026917	0.000117916	5.49118e-05	0.158763	FALSE	0.0449418	0.00132714	0.00485918	-0.00274104	0.00332614	0.092269	-0.0404574	-1.25232	1.10858	150.895	0.994887	0.85336	0.999288	FALSE		0
387						0.00206364	0.00010555	4.17853e-05	0.147053	FALSE	0.0356531	0.000828975	0.00368815	-0.00185887	0.00217671	0.0646944	-0.0613314	-1.04083	0.803773	151.042	0.995857	0.853466	0.999411	FALSE		0
316						0.00136972	8.26883e-05	4.24954e-05	0.0940662	FALSE	0.0193228	0.000690046	0.00202654	-0.00195203	0.00214818	0.0599692	-0.000158672	0	0	151.136	0.996477	0.853549	0.999508	FALSE		0
376						0.00167541	7.04216e-05	3.65185e-05	0.0953226	FALSE	0.0281229	0.000767793	0.00274028	-0.00179119	0.00195675	0.0610356	-0.10022	-1.4127	1.00607	151.232	0.997106	0.853619	0.999591	FALSE		0
394						0.00148864	6.30294e-05	3.46534e-05	0.0894009	TRUE	0.0261841	0.000714807	0.00223588	-0.00147183	0.00179747	0.0512158	-0.0166435	-1.49585	1.39695	151.321	0.997695	0.853682	0.999664	FALSE		0
89.042	89.0413	0.0127202	C4H8S		Sulfur containing	0.0160123	5.42712e-05	0.000138406	0.0173967	FALSE	0.0636504	0.00310787	0.035412	-0.0085706	0.00990746	0.0684315	-0.0112052	-0.552652	0.496127	151.338	0.99781	0.853736	0.999728	FALSE	4	0.00937807
306						0.00169764	5.05317e-05	4.29135e-05	0.0556657	FALSE	0.0231909	0.00101177	0.00240936	-0.00184169	0.00225464	0.0547836	-0.0262153	-0.683922	0.531261	151.394	0.998177	0.853787	0.999787	FALSE		0
423						0.0012488	4.86024e-05	2.43081e-05	0.0740117	FALSE	0.0235822	0.000730978	0.00184	-0.00115108	0.00123927	0.0487078	-0.0418084	-0.89072	0.757369	151.468	0.998665	0.853836	0.999844	FALSE		0
461						0.0011879	3.48137e-05	1.85194e-05	0.0577768	FALSE	0.0244474	0.000678482	0.00169855	-0.000828079	0.000940174	0.0355858	0.00176957	-0.605095	0.614696	151.526	0.999046	0.85387	0.999885	FALSE		0
427						0.00117448	3.41377e-05	2.26716e-05	0.0524764	FALSE	0.0223884	0.000671782	0.00166682	-0.00116289	0.00128781	0.0421847	-0.0329863	-0.865431	0.733702	151.578	0.999392	0.853905	0.999925	FALSE		0
444						0.00110822	3.02835e-05	1.64605e-05	0.0484052	FALSE	0.0219665	0.000711975	0.00156643	-0.000797647	0.000887958	0.032259	-0.0186583	-0.612692	0.579184	151.627	0.999711	0.853935	0.99996	FALSE		0
454						0.00100469	2.47333e-05	1.39257e-05	0.0404241	FALSE	0.0203628	0.000581295	0.00142581	-0.000656076	0.000753112	0.028404	0.00449996	-0.609016	0.661827	151.667	0.999977	0.85396	0.999989	FALSE		0
103.112	103.111	0.0147302	C6H14O	hexanol	Oxygen containing	0.00162422	9.12613e-06	1.99294e-05	0.00338765	FALSE	0.00747661	0.000426742	0.0035121	-0.000747285	0.000668366	0.00827278	0.0394647	-0.950487	1.13255	151.671	1	0.853969	1	FALSE	6	0.00236549
	103.122	0.0147318	C5H14N2		Nitrogen containing															151.671	1	0.853969	1	FALSE	5	0
103.123						0.000608422	1.48367e-07	4.37415e-06	5.50801e-05	TRUE	0.002801	0.000103668	0.00141375	0	0	0.00167918	0.148494	-0.366718	0.82347	151.671	1	0.853969	1	FALSE		0
																								FALSE		0
deposition
75.044	75.0443	0.0107206	C3H6O2	hydroxyacetone	Oxygen containing compounds	0.594305	-0.0579138	0.00112993	-15.6459	FALSE	1.99103	0.00289042	1.38751	-0.225742	0.0177178	0.823943	0.111643	-0.0383767	0.428227	-15.6459	0.140375	-0.0579138	0.150577	TRUE	3	-7.50563
43.018	43.0183	0.00614547	C2H2O	Ketene (or ethenone - same)	Oxygen containing compounds	0.51498	-0.0553716	0.00112257	-8.57511	FALSE	0.988991	0.0491412	1.24228	-0.215558	0.0577112	0.483336	0.129079	-0.110863	0.461259	-24.221	0.217311	-0.113285	0.294544	TRUE	2	-4.78411
47.013	47.0123	0.00671604	CH2O2	Formic acid	Oxygen containing compounds	0.11833	-0.0343878	0.000603882	-5.82002	TRUE	0.24835	0.00038061	0.327284	-0.130579	0.00847067	0.344398	0.306035	-0.20797	1.05536	-30.041	0.269529	-0.147673	0.383953	TRUE	1	-1.48555
61.028	61.0283	0.00871833	C2H4O2	Acetic acid	Oxygen containing compounds	0.220506	-0.0319841	0.000666259	-7.02692	FALSE	0.600762	-0.00699185	0.535087	-0.135087	0.0261454	0.419856	0.161151	-0.188214	0.639438	-37.0679	0.332574	-0.179657	0.467112	TRUE	2	-2.76342
31.018	31.0183	0.00443118	CH2O	Formaldehyde	Oxygen containing compounds	0.33885	-0.0182809	0.00112517	-2.04134	FALSE	0.469216	0.127786	0.584111	-0.0978693	0.0398622	0.178506	0.0432249	-0.105128	0.23401	-39.1093	0.350889	-0.197938	0.514643	TRUE	1	-0.789736
83.049	83.0493	0.0118642	C5H6O	Methylfuran or MBO	Oxygen containing compounds	0.0418486	-0.0169487	0.000239644	-5.06725	FALSE	0.155156	0.00887651	0.0889784	-0.0998188	0.00630231	0.397941	0.0290264	-0.972308	0.989572	-44.1765	0.396353	-0.214887	0.55871	TRUE	5	-3.66091
	83.0603	0.0118658	C4H6N2		Nitrogen containing compounds															-44.1765	0.396353	-0.214887	0.55871	FALSE	4	0
101.06	101.059	0.014437	C5H8O2	Pentanoic acid ISOPOOH (unsaturated hydroperoxides from isoprene oxidation)	Oxygen containing compounds	0.0222965	-0.010294	0.000170542	-3.74512	FALSE	0.100593	0.00356835	0.0576215	-0.0610178	0.00730963	0.349307	0.256731	-0.621448	1.56802	-47.9217	0.429954	-0.225181	0.585475	TRUE	5	-2.2235
31.029	31.0283	0.00443261	H2N2		Nitrogen containing	0.228744	-0.00825917	0.000909076	-0.922586	FALSE	0.316862	0.0753321	0.422135	-0.0595828	0.0377347	0.128923	0.0293988	-0.182195	0.262974	-48.8442	0.438232	-0.23344	0.606949	TRUE		0
41.039	41.0383	0.00586261	C3H4	Propyne	Hydrocarbons	0.349766	-0.00772664	0.000864858	-1.14154	FALSE	0.640807	0.0726858	0.694429	-0.107411	0.0508067	0.26368	0.0139377	-1.11534	1.12764	-49.9858	0.448474	-0.241167	0.627038	TRUE	3	-1.00137
83.086	83.0853	0.0118693	C6H10			0.0908114	-0.00754963	0.000379484	-2.25817	FALSE	0.336837	0.00914291	0.190306	-0.0501365	0.0132001	0.226396	0.0170052	-0.486876	0.552466	-52.2439	0.468734	-0.248716	0.646667	TRUE	6	-1.95686
76						0.0535449	-0.00598005	0.000374097	-1.63614	FALSE	0.18167	0.000838995	0.123656	-0.0355452	0.0116388	0.141553	0.131945	-0.476971	0.989184	-53.8801	0.483413	-0.254696	0.662215	TRUE		0
46.021						0.055318	-0.00590736	0.000510338	-0.978706	FALSE	0.113651	0.00180043	0.130811	-0.0382421	0.0177722	0.106317	-0.0304181	-1.24023	1.28537	-54.8588	0.492194	-0.260604	0.677575	TRUE		0
75.068						0.067084	-0.00573569	0.000386836	-1.55004	FALSE	0.224815	0.00710828	0.160627	-0.0298141	0.011676	0.130421	-0.00241983	-0.409137	0.408845	-56.4088	0.506101	-0.266339	0.692488	TRUE		0
95.086	95.0853	0.0135836	C7H10	Norbornene	Hydrocarbons	0.0694451	-0.00446756	0.000352526	-1.52929	FALSE	0.294788	-0.014655	0.165424	-0.0350041	0.0142884	0.206467	-0.0184294	-1.44635	1.13338	-57.9381	0.519822	-0.270807	0.704103	TRUE	7	-1.35099
111.117						0.0508453	-0.0044268	0.000269101	-1.77081	FALSE	0.252222	0.00396562	0.11078	-0.0329728	0.00826175	0.202008	0	0	0	-59.7089	0.53571	-0.275234	0.715613	TRUE		0
69.07	69.0703	0.00986718	C5H8	Isoprene	Hydrocarbons	0.143801	-0.00436491	0.000450632	-1.08534	FALSE	0.443409	0.0155648	0.341873	-0.0514518	0.0214655	0.214256	-0.00899097	-1.03771	1.07984	-60.7943	0.545448	-0.279599	0.726962	TRUE	5	-0.94282
71.049	71.0493	0.0101499	C4H6O	MVK+MACR	Oxygen containing compounds	0.064773	-0.00329538	0.000289809	-0.84288	FALSE	0.205449	0.0122655	0.167698	-0.0228239	0.01098	0.111213	0.0641716	-1.21202	1.45006	-61.6372	0.55301	-0.282894	0.73553	TRUE	4	-0.569441
97.101	97.1013	0.0138716	C7H12			0.0724343	-0.00285816	0.000327873	-0.999108	FALSE	0.313993	0.00452332	0.164206	-0.0290862	0.0138708	0.178784	-0.00971815	-0.492148	0.44496	-62.6363	0.561974	-0.285752	0.742961	TRUE	7	-0.864307
97.101	97.1013	0.0138716	C7H12	methyl cyclohexene heptadiene	Hydrocarbons	0.0724343	-0.00285816	0.000327873	-0.999108	FALSE	0.313993	0.00452332	0.164206	-0.0290862	0.0138708	0.178784	-0.00971815	-0.492148	0.44496	-63.6354	0.570938	-0.28861	0.750393	TRUE	7	-0.864307
111.104	111.117	0.0158739	C8H14		Hydrocarbons	0.0514123	-0.00280555	0.000269637	-1.12215	FALSE	0.255005	0.00344129	0.10936	-0.0248976	0.00958696	0.179285	0.000517076	-0.78145	0.667949	-64.7575	0.581006	-0.291416	0.757687	TRUE	8	-0.969599
219						-0.0161636	-0.00253754	0.00014652	-2.00059	FALSE	-0.158028	-0.04262	0.00943695	-0.0158354	0.00494401	0.191877	0	0	0	-66.7581	0.598955	-0.293953	0.764285	TRUE		0
101.096	101.095	0.0144422	C6H12O	3-Pentanone 2-methyl- Methyl Isobutyl Ketone Hexal Hexanone Hexal 2-Hexen-1-ol (E)-	Oxygen containing compounds	0.00858353	-0.00251423	9.7658e-05	-0.915044	FALSE	0.0387393	0.00227984	0.0189681	-0.0167844	0.0033766	0.0970538	0.161151	-0.188214	0.639438	-67.6732	0.607165	-0.296468	0.770822	TRUE	6	-0.651689
99.117						0.0210267	-0.00238719	0.000189798	-0.851801	FALSE	0.0930405	0.00150453	0.0532141	-0.0204844	0.00671569	0.111496	0.0606636	-0.556343	0.672507	-68.525	0.614808	-0.298855	0.777028	TRUE		0
109.101						0.0765481	-0.00228506	0.000311895	-0.897487	FALSE	0.372834	0.00863085	0.149102	-0.0245029	0.0129442	0.184115	0.0310155	-0.234589	0.329065	-69.4225	0.62286	-0.30114	0.78297	TRUE		0
56						0.0290455	-0.00227892	0.000285173	-0.459431	FALSE	0.0726138	0.0135842	0.0482541	-0.0185773	0.0123333	0.0741161	0.00973456	-0.445887	0.416585	-69.8819	0.626982	-0.303419	0.788895	TRUE		0
125.12	125.132	0.017876	C9H16		Hydrocarbons	0.0257865	-0.00222999	0.000189281	-1.00446	FALSE	0.144036	0.00162575	0.0537761	-0.0193774	0.00680929	0.139346	-0.0259775	-0.802225	0.756967	-70.8863	0.635994	-0.305649	0.794693	TRUE	9	-0.867019
136						0.0121237	-0.0021861	0.000116398	-1.07031	FALSE	0.0736081	0.00351779	0.026245	-0.0144041	0.00389865	0.107377	0.163055	-0.39377	0.89884	-71.9567	0.645597	-0.307835	0.800377	TRUE		0
48						0.0247712	-0.00200141	0.000324896	-0.345844	FALSE	0.0530811	0.0114799	0.0402237	-0.021464	0.0126371	0.0718038	0.0809517	-0.476932	0.760997	-72.3025	0.6487	-0.309836	0.805581	TRUE		0
109.089	109.101	0.0155859	C8H12		Hydrocarbons	0.0751766	-0.00194784	0.000302111	-0.764955	FALSE	0.366113	0.00918334	0.143419	-0.0254296	0.0130554	0.170571	0.0222184	-0.220596	0.284519	-73.0675	0.655563	-0.311784	0.810645	TRUE	8	-0.673172
187.148	187.148	0.0267355	C14H18		Hydrocarbons	0.00356235	-0.00194571	5.04923e-05	-1.31089	FALSE	0.0297628	0.00126806	0.00933855	-0.0115024	0.000795582	0.113756	0.0194093	-1.19939	1.10883	-74.3783	0.667324	-0.31373	0.815704	TRUE	14	-1.17676
	187.168	0.0267383	C11H22O2		Oxygen containing compounds															-74.3783	0.667324	-0.31373	0.815704	FALSE	11	0
67						0.045863	-0.00183798	0.000313544	-0.443321	FALSE	0.13718	0.00992156	0.0976648	-0.0208078	0.0135732	0.0987058	0.0438409	-0.408607	0.577381	-74.8217	0.671302	-0.315568	0.820483	TRUE		0
61.065	61.0643	0.00872347	C3H8O	propanol	Oxygen containing	0.0151879	-0.00177946	0.000165895	-0.391185	FALSE	0.0414041	0.00192492	0.0337882	-0.0122291	0.00557173	0.0498436	0.0931611	-0.415829	0.649836	-75.2129	0.674811	-0.317347	0.825109	TRUE	3	-0.230618
99.104	99.1173	0.0141596	C7H14	Cycloheptane Cyclohexane methyl- Cyclopentane 1 2-dimethyl- cis-	Hydrocarbons	0.0228091	-0.00177255	0.000187376	-0.632401	FALSE	0.100914	0.000731438	0.0578714	-0.0175282	0.00746901	0.102433	0.0639877	-0.767055	0.726825	-75.8453	0.680485	-0.31912	0.829718	TRUE	7	-0.53602
109.076						0.0597315	-0.00171222	0.000273036	-0.672344	TRUE	0.29086	0.00781397	0.115967	-0.0209286	0.0121518	0.147988	5.10485e-05	0	0	-76.5176	0.686518	-0.320832	0.83417	TRUE		0
133.101	133.101	0.0190145	C10H12	Benzene 4-ethenyl-1 2-dimethyl- (or position isomer) Benzene (2-methyl-1-propenyl)-	Hydrocarbons	0.00708558	-0.00169107	7.28927e-05	-0.810301	FALSE	0.0421026	0.00272305	0.0148791	-0.00975022	0.00195283	0.071994	0.145535	-0.309849	0.706277	-77.3279	0.693788	-0.322523	0.838567	TRUE	10	-0.730544
125.107						0.0229081	-0.00165736	0.000174756	-0.74645	TRUE	0.127945	0.0016806	0.0471826	-0.0147987	0.00646197	0.121624	0.0620026	-0.411217	0.669492	-78.0743	0.700485	-0.32418	0.842876	TRUE		0
81.07	81.0703	0.0115815	C6H8	hexadiene cyclique - fragment monoterpenes	Hydrocarbons	0.12103	-0.00157453	0.00038883	-0.45953	TRUE	0.438033	0.0268349	0.280374	-0.0264825	0.0210156	0.17911	0.011641	-0.860509	0.899036	-78.5339	0.704608	-0.325755	0.84697	TRUE	6	-0.408119
233						0.00620623	-0.00151895	9.97802e-05	-1.2741	TRUE	0.0645559	0.0017336	0.0132939	-0.00902541	0.00295324	0.126132	0.187567	-0.474853	1.04572	-79.808	0.716039	-0.327274	0.850919	TRUE		0
72						0.0136198	-0.00146831	0.000190602	-0.380587	FALSE	0.0437778	0.00469367	0.0249782	-0.0131299	0.00684511	0.061615	0.0544916	-0.767083	0.975488	-80.1886	0.719454	-0.328742	0.854737	TRUE		0
203.154	203.153	0.0290219	C13H18N2		Nitrogen containing	0.00490851	-0.00146592	5.86485e-05	-1.07211	FALSE	0.0445171	0.00205168	0.0108274	-0.00889775	0.0014016	0.0974271	0.208039	-0.377963	1.03226	-81.2607	0.729073	-0.330208	0.858548	TRUE	13	-0.823261
	203.179	0.0290256	C15H22		Hydrocarbons															-81.2607	0.729073	-0.330208	0.858548	FALSE	15	0
217						0.00630516	-0.00139566	8.75164e-05	-1.09029	TRUE	0.0610812	0.00249785	0.0153751	-0.0107152	0.00341245	0.126248	0.156516	-0.622191	1.03678	-82.351	0.738855	-0.331604	0.862177	TRUE		0
123.092	123.091	0.0175845	C7H10N2		Nitrogen containing	0.0409644	-0.00133054	0.000239963	-0.589605	TRUE	0.225107	0.00501605	0.0810078	-0.0168023	0.0110628	0.145007	0.0225634	-0.33359	0.425148	-82.9406	0.744145	-0.332934	0.865636	TRUE	7	-0.402356
	123.08	0.0175829	C8H10O	Phenol ethyl	Oxygen containing compounds															-82.9406	0.744145	-0.332934	0.865636	FALSE	8	0
99.092	99.1033	0.0141576	C6H12N		Nitrogen containing	0.0216173	-0.00128532	0.000179655	-0.458514	FALSE	0.0956297	0.000288615	0.0542049	-0.012753	0.00683435	0.08356	0.0067612	-0.736154	0.567908	-83.3991	0.748258	-0.33422	0.868978	TRUE	6	-0.333155
125.096	125.106	0.0178723	C7H12N2		Nitrogen containing	0.0164573	-0.00128198	0.00014987	-0.577334	FALSE	0.0919083	0.000956555	0.0334577	-0.0140522	0.00580081	0.104567	0.0437461	-0.647041	0.767548	-83.9764	0.753438	-0.335502	0.872311	TRUE	7	-0.387671
139.148	139.155	0.0198793	C10H18		Hydrocarbons	0.0139153	-0.00124119	0.000178433	-0.621754	FALSE	0.0864415	0.00181513	0.0274631	-0.0104518	0.00470436	0.0908443	-0.0534695	-0.792557	0.606655	-84.5982	0.759017	-0.336743	0.875538	TRUE	10	-0.536195
133.065	133.065	0.0190093	C9H8O		Oxygen containing compounds	0.00572236	-0.00122434	6.30777e-05	-0.586502	FALSE	0.0339931	0.00208408	0.0117909	-0.00690627	0.00186693	0.052705	0.148494	-0.366718	0.82347	-85.1847	0.764279	-0.337967	0.878722	TRUE	9	-0.476025
137.132	137.132	0.0195903	C10H16	Monoterpenes	Hydrocarbons	0.0428148	-0.00119368	7.32725e-05	-0.589291	FALSE	0.26211	0.00878767	0.104162	-0.0151208	0.00901117	0.130865	0.0378945	-0.19407	0.345379	-85.774	0.769566	-0.339161	0.881825	TRUE	10	-0.515671
201.139	201.164	0.0287378	C15H20		Hydrocarbons	0.00327518	-0.00117044	5.12052e-05	-0.847518	TRUE	0.0294092	0.000913209	0.00876821	-0.00702782	0.00125437	0.0794896	0.213989	-0.552884	1.08036	-86.6215	0.77717	-0.340331	0.884868	TRUE	15	-0.758447
	201.138	0.028734	C13H16N2		Nitrogen containing															-86.6215	0.77717	-0.340331	0.884868	FALSE	13	0
58						0.0298794	-0.00107432	0.000300414	-0.224318	FALSE	0.0773662	0.0141539	0.0506452	-0.016359	0.0132999	0.0732648	0.0232646	-0.462009	0.516587	-86.8458	0.779182	-0.341406	0.887662	TRUE		0
189.164	189.164	0.0270235	C14H20		Hydrocarbons	0.00314403	-0.00106677	4.24172e-05	-0.726463	FALSE	0.0265507	0.00129719	0.00711265	-0.00653502	0.00132342	0.0773358	0.170587	-0.55165	1.19139	-87.5723	0.7857	-0.342472	0.890435	TRUE	14	-0.645185
83.01	83.0093	0.0118585	C2HF3			0.00577987	-0.00106247	7.0568e-05	-0.317505	FALSE	0.0214191	0.00286018	0.0100052	-0.00738591	0.00221657	0.0341538	-0.0186583	-0.612692	0.579184	-87.8898	0.788549	-0.343535	0.893198	TRUE	2	-0.0917976
83.01	83.0123	0.0118589	C4H2O2		Oxygen containing	0.00577987	-0.00106247	7.0568e-05	-0.317505	TRUE	0.0214191	0.00286018	0.0100052	-0.00738591	0.00221657	0.0341538	-0.0186583	-0.612692	0.579184	-88.2073	0.791398	-0.344597	0.89596	TRUE	4	-0.183595
139						0.0201594	-0.000981974	0.000106874	-0.49138	TRUE	0.125096	0.0030289	0.038724	-0.0129668	0.00764428	0.118522	0.0454653	-0.485688	0.596344	-88.6986	0.795806	-0.345579	0.898513	TRUE		0
231						0.00555002	-0.000944264	0.000102982	-0.78525	FALSE	0.0572346	0.00224316	0.0106056	-0.00705343	0.00354417	0.114681	0.136697	-0.721845	1.09406	-89.4839	0.802852	-0.346524	0.900968	TRUE		0
149.096	149.096	0.0212995	C10H12O	mâ€šthyl chavicol (estragole)	Oxygen containing compounds	0.0109876	-0.000926123	0.000225707	-0.497092	TRUE	0.0731344	0.00141846	0.0229079	-0.00781412	0.00486304	0.0822757	-0.0316726	-0.794684	0.689117	-89.981	0.807312	-0.34745	0.903376	TRUE	10	-0.400085
	149.081	0.0212973	C6H12O4		Oxygen containing compounds															-89.981	0.807312	-0.34745	0.903376	FALSE	6	0
74						0.0231293	-0.000923105	0.000203473	-0.245915	FALSE	0.0764091	0.0111309	0.0460536	-0.0110528	0.00848425	0.0615166	0.0445197	-0.479871	0.656452	-90.2269	0.809518	-0.348373	0.905776	TRUE		0
205.195	205.195	0.0293136	C15H24	Sesquiterpene	Hydrocarbons	0.0112938	-0.00090941	9.72892e-05	-0.671783	FALSE	0.103457	0.00350062	0.0216626	-0.0104715	0.00457388	0.130411	0.0100518	-1.39338	1.32273	-90.8987	0.815545	-0.349282	0.908141	TRUE	15	-0.589298
113.107						0.0128891	-0.000873248	0.000141166	-0.355574	FALSE	0.0650826	0.00173109	0.0270725	-0.00971578	0.00605987	0.0775544	0.0560093	-0.519617	0.705949	-91.2543	0.818735	-0.350156	0.910411	TRUE		0
147						0.00710905	-0.000857811	4.74782e-05	-0.453954	FALSE	0.0466531	0.00333701	0.0125083	-0.00837199	0.00419815	0.0790338	0.0731018	-0.668934	0.917997	-91.7082	0.822808	-0.351013	0.912642	TRUE		0
105.07						0.0205238	-0.000790494	0.000146903	-0.299006	FALSE	0.0962695	0.00773834	0.0450997	-0.0103929	0.00705384	0.0773633	0.0486239	-0.384609	0.583379	-92.0072	0.825491	-0.351804	0.914697	TRUE		0
281						0.00904212	-0.000784103	0.000110074	-0.793198	FALSE	0.11343	0.00186264	0.0210611	-0.00767092	0.0045464	0.135842	0.145535	-0.309849	0.706277	-92.8004	0.832608	-0.352588	0.916736	TRUE		0
107.086	107.085	0.0152979	C8H10	ethylbenzene + xylene		0.0651262	-0.00077698	0.000189633	-0.299533	FALSE	0.311344	0.0148674	0.198776	-0.010468	0.00795429	0.0914378	-0.00667109	-0.615421	0.605667	-93.1	0.835295	-0.353365	0.918756	TRUE	8	-0.268524
163.148						0.00595646	-0.000756403	8.23971e-05	-0.44426	FALSE	0.0433833	0.00146902	0.011388	-0.0067484	0.00322063	0.0697336	-0.031162	-0.742934	0.698609	-93.5442	0.839281	-0.354121	0.920722	TRUE		0
121.089	121.101	0.0173002	C9H12	Benzene propyl- Mesitylene 5 Benzene -trimethyl- isomers 2 Benzene ethylmethyl isomers	Hydrocarbons	0.0302171	-0.000719854	0.000143743	-0.313799	FALSE	0.163346	0.00775716	0.0842508	-0.00817017	0.00611788	0.074854	0.0239733	-0.294871	0.361972	-93.858	0.842096	-0.354841	0.922594	TRUE	9	-0.279879
	121.086	0.017298	C5H12O3		Oxygen containing compounds															-93.858	0.842096	-0.354841	0.922594	FALSE	5	0
53.026						0.0180561	-0.000719699	0.000156548	-0.137386	FALSE	0.0427431	0.00395716	0.0443413	-0.00950727	0.00711118	0.038645	-0.0256006	-0.274573	0.184853	-93.9954	0.843329	-0.355561	0.924465	TRUE		0
207						0.0126539	-0.000718621	0.000130086	-0.535516	FALSE	0.116935	0.00203861	0.0254699	-0.00714497	0.00500824	0.114059	0.0618101	-0.55832	0.740268	-94.5309	0.848134	-0.356279	0.926334	TRUE		0
119.06	119.07	0.01701	C5H10O3		Oxygen containing compounds	0.00886099	-0.000708132	8.43697e-05	-0.303517	FALSE	0.0470977	0.00227172	0.0184876	-0.00666255	0.00335774	0.0513114	-0.000417277	-0.0144665	0.00787124	-94.8344	0.850857	-0.356988	0.928175	TRUE	5	-0.152956
	119.049	0.017007	C8H6O		Oxygen containing compounds															-94.8344	0.850857	-0.356988	0.928175	FALSE	8	0
215						0.00329692	-0.000683656	7.02914e-05	-0.52915	FALSE	0.0316445	0.00149293	0.00650392	-0.00551886	0.00256567	0.0732345	0.00312919	-1.0266	1.01171	-95.3636	0.855604	-0.357671	0.929952	TRUE		0
229						0.0119085	-0.000671483	0.000118336	-0.55357	FALSE	0.121743	0.00222488	0.0290977	-0.00738788	0.00464815	0.125807	0.0532096	-0.55775	0.748177	-95.9172	0.860571	-0.358343	0.931698	TRUE		0
163.123	163.133	0.0233048	C8H18O3		Oxygen containing compounds	0.00596279	-0.000668924	8.09633e-05	-0.392821	FALSE	0.0434227	0.00143837	0.0119205	-0.00646389	0.00309139	0.0653292	0.0991196	-0.639284	0.924861	-96.31	0.864095	-0.359012	0.933438	TRUE	8	-0.23118
	163.144	0.0233063	C7H18N2O2		Nitrogen containing compounds															-96.31	0.864095	-0.359012	0.933438	FALSE	7	0
	163.148	0.0233069	C12H18		Hydrocarbons															-96.31	0.864095	-0.359012	0.933438	FALSE	12	0
227						0.0336958	-0.000635932	0.000183397	-0.519684	TRUE	0.34147	0.00221174	0.087489	-0.011435	0.00820767	0.183229	-0.0648558	-1.74741	1.59362	-96.8297	0.868758	-0.359648	0.935091	TRUE		0
150						0.00581117	-0.000617522	0.000123827	-0.333462	FALSE	0.0389141	0.000703713	0.0127372	-0.0076703	0.00494363	0.076782	0	0	0	-97.1631	0.87175	-0.360265	0.936697	TRUE		0
153.151	153.164	0.0218806	C11H20		Hydrocarbons	0.0116488	-0.000606705	9.8429e-05	-0.334503	TRUE	0.0796438	0.00222062	0.0256142	-0.00724968	0.00444238	0.0774442	-0.00771353	-1.08888	1.02568	-97.4976	0.874751	-0.360872	0.938274	TRUE	11	-0.288306
221						0.00461612	-0.000600045	0.000107004	-0.477396	FALSE	0.045543	-0.0013369	0.0115023	-0.00685092	0.00441453	0.108811	0.222523	-1.89378	3.13916	-97.975	0.879034	-0.361472	0.939834	TRUE		0
62.995						0.0125294	-0.000597692	0.00012587	-0.135546	FALSE	0.0352361	0.00435302	0.0239159	-0.00778817	0.00629213	0.0393639	0.0435066	-1.18339	1.22174	-98.1106	0.88025	-0.36207	0.941388	TRUE		0
141	141.018	0.0201455	C6H4O4		Oxygen containing compounds	0.00959547	-0.000569613	0.00010088	-0.289136	FALSE	0.0604001	-0.00151658	0.0227539	-0.00878065	0.00690343	0.0967061	-0.0522599	-0.961527	0.80497	-98.3997	0.882844	-0.362639	0.942869	TRUE	6	-0.147644
105.057	105.07	0.01501	C8H8	Styrene	Hydrocarbons	0.0246726	-0.000569097	0.000177287	-0.215236	FALSE	0.115716	0.00980282	0.0523337	-0.0106067	0.0093948	0.0879326	0.00660706	-0.880277	0.917163	-98.6149	0.884775	-0.363208	0.944349	TRUE	8	-0.19668
	105.054	0.0150078	C4H8O3		Oxygen containing															-98.6149	0.884775	-0.363208	0.944349	FALSE	4	0
127.112	127.111	0.0181588	C8H14O	1-Octen-3-one/6-methyl-5-hepten-2-one	Oxygen containing compounds	0.00947043	-0.000566698	0.0001156	-0.259323	FALSE	0.0537413	0.00138814	0.0199451	-0.00769222	0.00502762	0.0717158	0.0469255	-0.773459	1.02149	-98.8743	0.887102	-0.363775	0.945822	TRUE	8	-0.195851
161.132	161.132	0.0230189	C12H16		Hydrocarbons	0.00291302	-0.000553529	4.71516e-05	-0.321088	FALSE	0.0209545	0.000903983	0.00578711	-0.00423637	0.00195946	0.0426998	-0.000129515	-0.830112	0.764935	-99.1953	0.889983	-0.364329	0.947261	TRUE	12	-0.286949
85.065	85.0653	0.0121522	C5H8O	Ethylvinylketone OR Cyclopentanone	Oxygen containing compounds	0.0191103	-0.000546564	0.000168848	-0.167376	TRUE	0.0725724	0.0034303	0.0395958	-0.0106125	0.00783843	0.0671537	0.00377543	-0.537674	0.480465	-99.3627	0.891485	-0.364875	0.948683	TRUE	5	-0.118058
173						0.0168348	-0.000535703	0.00018732	-0.333636	FALSE	0.130019	0.000373503	0.0343633	-0.0115276	0.0083849	0.15071	0.0272424	-1.12154	1.11045	-99.6964	0.894478	-0.365411	0.950075	FALSE		0
102.068						0.00312165	-0.000490911	4.41829e-05	-0.180383	FALSE	0.0142241	0.000904519	0.00677585	-0.0038765	0.00126338	0.0286118	0.0142418	-0.958205	1.12282	-99.8767	0.896096	-0.365902	0.951352	TRUE		0
235						0.00432236	-0.000490284	8.38126e-05	-0.41478	FALSE	0.0453461	0.00145753	0.00783515	-0.00525858	0.00363219	0.089633	0.0101512	-1.44921	1.55312	-100.292	0.899818	-0.366392	0.952626	TRUE		0
107.049	107.049	0.0152928	C7H6O	Benzaldehyde	Oxygen containing compounds	0.0306823	-0.000481827	0.00014423	-0.185685	FALSE	0.14663	0.00784397	0.0806119	-0.00761694	0.00728422	0.0697011	0.0195175	-0.163185	0.228608	-100.477	0.901484	-0.366874	0.953879	TRUE	7	-0.145704
	107.06	0.0152943	C6H6N2		Nitrogen containing compounds															-100.477	0.901484	-0.366874	0.953879	FALSE	6	0
98.975	98.9743	0.0141392	H2O4S		Oxygen containing	0.00552668	-0.000479054	6.86047e-05	-0.170692	FALSE	0.0244198	0.00335451	0.0112894	-0.00430673	0.00265714	0.0302117	0.0164758	-0.55849	0.639993	-100.648	0.903015	-0.367353	0.955125	TRUE		0
110.109						0.00999654	-0.000472116	0.000104244	-0.187143	FALSE	0.0491388	0.00338853	0.0182309	-0.00646683	0.00399036	0.0484597	0.0161284	-0.780009	0.897061	-100.835	0.904694	-0.367825	0.956352	TRUE		0
109.065	109.065	0.0155808	C7H8O	Cresols - Methoxybenzene	Oxygen containing compounds	0.0343433	-0.000454882	0.000207935	-0.178602	FALSE	0.167217	0.00336717	0.0674519	-0.0130755	0.0104082	0.103736	0	0	0	-101.014	0.906297	-0.36828	0.957535	FALSE	7	-0.137556
	109.075	0.0155822	C6H8N2		Nitrogen containing															-101.014	0.906297	-0.36828	0.957535	FALSE	6	0
183.08	183.079	0.0261542	C13H10O		Oxygen containing	0.00368825	-0.000436453	5.37381e-05	-0.287661	FALSE	0.0301449	0.00149546	0.00756359	-0.00424106	0.00213205	0.0510412	-0.00625442	-0.471534	0.429343	-101.301	0.908878	-0.368716	0.95867	TRUE	13	-0.245112
	183.101	0.0261573	C10H14O3		Oxygen containing compounds															-101.301	0.908878	-0.368716	0.95867	FALSE	10	0
175.148	175.148	0.0250212	C13H18		Hydrocarbons	0.00215394	-0.000424088	3.20622e-05	-0.267402	FALSE	0.0168419	0.000874305	0.00436524	-0.00317544	0.00101167	0.0336709	0.0310956	-1.03923	1.19915	-101.569	0.911277	-0.36914	0.959772	TRUE	13	-0.238168
117.091	117.101	0.0167288	C5H12N2O		Nitrogen containing	0.00447125	-0.000421922	6.87754e-05	-0.177852	TRUE	0.0233725	0.000298233	0.0104329	-0.00479551	0.00308378	0.0418763	-0.00725677	-0.155928	0.123376	-101.747	0.912872	-0.369562	0.960869	TRUE	5	-0.0911352
117.078	117.091	0.0167273	C6H12O2	Butanoic acid ethyl ester Acetic acid butyl ester Methyl valerate Propanoic acid propyl ester Hexanoic acid Isobutyl acetate 1-Butanol-3-methyl- formate	Oxygen containing compounds	0.00476613	-0.00039119	7.00087e-05	-0.164879	TRUE	0.0249111	0.000539324	0.0107443	-0.00476252	0.00297368	0.0384494	0.025212	-0.299558	0.370865	-101.911	0.914352	-0.369954	0.961887	TRUE	6	-0.101396
84.081	84.0803	0.0120115	C5H9N		Nitrogen containing compounds	0.00975653	-0.000385812	0.000108184	-0.116782	FALSE	0.0366223	0.00298683	0.0171677	-0.0065094	0.00424707	0.0385585	0.00818223	-0.481918	0.572767	-102.028	0.9154	-0.370339	0.96289	TRUE	5	-0.0833354
220						-0.00190982	-0.000373233	7.45681e-05	-0.295601	FALSE	-0.0187572	-0.0062784	0.00182645	-0.00460561	0.00328539	0.0716002	-0.0243736	-0.70168	0.589379	-102.324	0.918052	-0.370713	0.96386	TRUE		0
66						0.00661948	-0.000366824	0.00013617	-0.0871573	FALSE	0.0195038	0.00319099	0.0101585	-0.00723101	0.00582052	0.0378197	-0.00543052	-0.967255	0.993715	-102.411	0.918834	-0.371079	0.964814	FALSE		0
197.132	197.153	0.0281648	C12H20O2		Oxygen containing compounds	0.00305724	-0.000363475	4.71068e-05	-0.257949	FALSE	0.0269053	0.00114797	0.00709555	-0.00346925	0.00178176	0.0482783	0.0116795	-1.04437	1.13488	-102.669	0.921148	-0.371443	0.965759	TRUE	12	-0.188425
	197.132	0.0281618	C15H16		Hydrocarbons															-102.669	0.921148	-0.371443	0.965759	FALSE	15	0
145.122	145.122	0.0207318	C8H16O2	Pentanoic acid 4-methyl- ethyl ester Decal Butanoic acid butyl ester Hexanoic acid ethyl ester Octanoic acid Acetic acid hexyl ester	Oxygen containing compounds	0.00277746	-0.000363446	4.39126e-05	-0.189878	FALSE	0.0179942	0.000435839	0.00630111	-0.00405405	0.00230115	0.0380564	0.00948503	-1.2585	1.27556	-102.859	0.922852	-0.371806	0.966704	TRUE	8	-0.125607
	145.101	0.0207288	C11H12		Hydrocarbons															-102.859	0.922852	-0.371806	0.966704	FALSE	11	0
117.07	117.069	0.0167242	C9H8			0.00458357	-0.000355639	6.81716e-05	-0.149885	FALSE	0.0239553	0.000643031	0.0102975	-0.00449627	0.00280903	0.036577	-0.0505362	-1.18165	1.17636	-103.009	0.924196	-0.372162	0.967628	TRUE	9	-0.138273
	117.054	0.016722	C5H8O3		Oxygen containing compounds															-103.009	0.924196	-0.372162	0.967628	FALSE	5	0
135.08	135.079	0.019297	C9H10O		Oxygen containing	0.023546	-0.000354205	0.000128138	-0.172246	TRUE	0.141991	0.00389558	0.0742921	-0.00827002	0.00608648	0.082537	0.00867606	-0.539109	0.522966	-103.181	0.925742	-0.372516	0.968549	FALSE	9	-0.137715
117.102						0.00398867	-0.00034902	6.54342e-05	-0.147136	TRUE	0.0208518	9.97347e-05	0.00937829	-0.00436659	0.00275737	0.0354903	-0.0413747	-0.812182	0.713087	-103.328	0.927062	-0.372865	0.969457	TRUE		0
121.065	121.076	0.0172966	C7H8N2		Nitrogen containing compounds	0.0200238	-0.000346251	0.000127725	-0.150908	TRUE	0.108222	0.00414538	0.0532392	-0.00686615	0.00630237	0.0662202	0.0213341	-1.05427	1.1531	-103.479	0.928416	-0.373211	0.970357	FALSE	7	-0.104706
99.08	99.0913	0.0141559	C5H10N2		Nitrogen containing	0.01747	-0.000344247	0.000148289	-0.122789	FALSE	0.0772735	0.00109793	0.042506	-0.00746774	0.00644303	0.0606128	-0.00430203	-0.944945	0.845711	-103.602	0.929517	-0.373556	0.971252	FALSE	5	-0.0743572
	99.0803	0.0141543	C6H10O	Hexel Hexenone Heptene	Oxygen containing compounds															-103.602	0.929517	-0.373556	0.971252	FALSE	6	0
232						0.00741738	-0.000340299	0.000131075	-0.284218	TRUE	0.0768229	0.000880751	0.0150533	-0.00800254	0.00597533	0.13714	0.0145119	-1.29138	1.27655	-103.886	0.932067	-0.373896	0.972137	FALSE		0
125.084	125.096	0.0178709	C8H12O		Oxygen containing compounds	0.00860551	-0.000339795	0.000110578	-0.153011	FALSE	0.0480541	0.000795295	0.0184274	-0.00762228	0.00547248	0.0702837	-0.0189515	-1.44729	1.4153	-104.039	0.93344	-0.374236	0.97302	TRUE	8	-0.117433
202						0.00200296	-0.000325301	5.18165e-05	-0.236559	TRUE	0.0180624	0.00109245	0.00344461	-0.00334079	0.00198531	0.0491734	0.137736	-0.938995	1.36323	-104.276	0.935563	-0.374561	0.973866	TRUE		0
153.127	153.127	0.0218753	C10H16O	Thujone (or stereoisomers) camphor + Methyl salicylate	Oxygen containing compounds	0.0120272	-0.000306966	7.37283e-05	-0.169217	TRUE	0.0822181	0.00265521	0.027405	-0.00668797	0.00465944	0.0743054	0.0180778	-0.94091	1.03441	-104.445	0.937081	-0.374868	0.974664	TRUE	10	-0.132609
112.112	112.112	0.016016	C7H13N		Nitrogen containing compounds	0.0063247	-0.000303988	8.20063e-05	-0.122691	FALSE	0.0316551	0.00154958	0.0118838	-0.00557851	0.00395379	0.0429244	0.0624982	-1.08126	1.21426	-104.567	0.938182	-0.375172	0.975455	TRUE	7	-0.091926
82.078	82.0723	0.0117246	C6H813C			0.0122911	-0.000289086	0.000116992	-0.0854193	TRUE	0.0450371	0.00413475	0.0239591	-0.00675787	0.00607108	0.041169	0.0378509	-1.37211	1.55829	-104.653	0.938948	-0.375461	0.976206	FALSE	6	-0.074931
	82.0773	0.0117253	C6H9																	-104.653	0.938948	-0.375461	0.976206	FALSE	6	0
86.096	86.0963	0.0122995	C5H11N	Piperidine	Nitrogen containing compounds	0.00485487	-0.00028752	8.07185e-05	-0.0891156	FALSE	0.01866	0.00149634	0.010523	-0.0050002	0.0034828	0.0321071	0.000409851	-1.08234	1.11308	-104.742	0.939748	-0.375749	0.976954	TRUE	5	-0.0621043
69.033	69.0333	0.0098619	C4H4O	Furan	Oxygen containing compounds	0.0148862	-0.000286569	0.00014397	-0.0712177	FALSE	0.0458766	0.00350562	0.0285429	-0.0077051	0.0070175	0.0442585	0.0179557	-0.819571	0.904928	-104.813	0.940387	-0.376035	0.977699	FALSE	4	-0.0495191
218						0.00230566	-0.000284219	5.65024e-05	-0.223055	FALSE	0.022439	0.00115576	0.00445309	-0.00355033	0.00247388	0.0562971	0.0694133	-0.852966	1.19063	-105.036	0.942388	-0.376319	0.978438	TRUE		0
145.076	145.085	0.0207265	C7H12O3		Oxygen containing	0.00241265	-0.000280714	9.0758e-05	-0.146609	FALSE	0.0156258	0.000666425	0.00524989	-0.00303921	0.00181155	0.0305445	0.0226193	-0.576907	0.58503	-105.183	0.943703	-0.3766	0.979168	TRUE	7	-0.0848879
	145.065	0.0207236	C10H8O		Oxygen containing compounds															-105.183	0.943703	-0.3766	0.979168	FALSE	10	0
	145.075	0.020725	C9H8N2		Nitrogen containing															-105.183	0.943703	-0.3766	0.979168	FALSE	9	0
131.107	131.106	0.0187295	C7H14O2	Hexanoic acid methyl ester Butanoic acid propyl ester Butanoic acid 3-methyl- ethyl ester Propanoic acid butyl ester Isopentyl acetate	Oxygen containing compounds	0.00273439	-0.000274554	4.57794e-05	-0.129586	FALSE	0.0160044	0.000953891	0.00574639	-0.00306115	0.0017704	0.0268706	0.0137176	-0.76992	0.796006	-105.312	0.944866	-0.376875	0.979882	TRUE	7	-0.0830253
110.084						0.00840598	-0.000267015	9.31169e-05	-0.105819	FALSE	0.0413109	0.00208231	0.016022	-0.00536586	0.004465	0.0453755	0.00176957	-0.605095	0.614696	-105.418	0.945815	-0.377142	0.980576	FALSE		0
181.17	181.195	0.025885	C13H24		Hydrocarbons	0.00327448	-0.000262872	6.14037e-05	-0.171448	TRUE	0.0264838	0.000518584	0.00615004	-0.00366332	0.00263914	0.048528	0.00966151	-0.163238	0.274911	-105.59	0.947353	-0.377405	0.981259	TRUE	13	-0.147629
206						0.00359507	-0.000222145	7.38551e-05	-0.164743	FALSE	0.0330618	0.00157744	0.00606426	-0.00406952	0.0035792	0.0663228	0.0708751	-0.855242	1.01122	-105.754	0.948832	-0.377627	0.981837	TRUE		0
234						0.00290343	-0.000215818	7.57257e-05	-0.181805	FALSE	0.0303305	0.00122677	0.00499332	-0.00428125	0.00334492	0.0750868	-0.0139565	-0.98834	1.00308	-105.936	0.950463	-0.377843	0.982398	FALSE		0
211.148	211.169	0.030167	C13H22O2		Oxygen containing compounds	0.00194509	-0.000210417	3.6494e-05	-0.159945	FALSE	0.0183349	0.000618713	0.00462619	-0.00252321	0.00116211	0.0346429	0.00151324	-0.636116	0.639087	-106.096	0.951898	-0.378053	0.982945	TRUE	13	-0.11817
	211.132	0.0301618	C12H18O3		Oxygen containing															-106.096	0.951898	-0.378053	0.982945	FALSE	12	0
	211.148	0.030164	C16H18		Hydrocarbons															-106.096	0.951898	-0.378053	0.982945	FALSE	16	0
103.075	103.074	0.0147249	C5H10O2	Pentanoic acid	acid	0.00577556	-0.000208291	7.89176e-05	-0.0772904	FALSE	0.0265766	0.000762897	0.0128222	-0.00449544	0.0032878	0.0340351	-0.0596346	-0.790563	0.631971	-106.174	0.952591	-0.378261	0.983487	FALSE	5	-0.0449908
87.044	87.0433	0.0124348	C4H6O2+	2-3 Butanedione Acetic acid ethenyl ester Butenoic acid	Oxygen containing compounds	0.0205061	-0.000204198	0.000164346	-0.0639871	TRUE	0.0796846	0.0030413	0.0468669	-0.0103989	0.00930918	0.0719601	0.0119754	-0.912247	0.933144	-106.238	0.953165	-0.378465	0.984018	FALSE	4	-0.0352854
164						0.00347406	-0.000203581	8.20312e-05	-0.120194	FALSE	0.0254351	0.00145258	0.00581609	-0.00444734	0.00367986	0.0581053	0.00480954	-0.161312	0.166539	-106.358	0.954244	-0.378669	0.984547	FALSE		0
131.06	131.07	0.0187243	C6H10O3		Oxygen containing compounds	0.00287954	-0.000202537	4.54212e-05	-0.09556	FALSE	0.0168479	0.00109529	0.0058245	-0.00294987	0.00185321	0.0273774	-0.0265458	-0.852816	0.649252	-106.453	0.955101	-0.378872	0.985074	TRUE	6	-0.0524975
	131.059	0.0187228	C8H6N2		Nitrogen containing															-106.453	0.955101	-0.378872	0.985074	FALSE	8	0
84.919	84.9183	0.0121312				0.00344515	-0.000199261	4.91065e-05	-0.0609158	FALSE	0.0130606	0.00161972	0.00549712	-0.00296083	0.00211627	0.0175925	0.0158764	-1.05669	1.15095	-106.514	0.955648	-0.379071	0.985592	TRUE		0
503						0.0028496	-0.000197689	5.52372e-05	-0.357974	FALSE	0.0639889	0.0012438	0.00488655	-0.00297	0.00272604	0.124363	-0.147785	-0.672666	0.114955	-106.872	0.958859	-0.379269	0.986106	TRUE		0
208						0.00395561	-0.000194852	7.73075e-05	-0.145905	FALSE	0.0367306	0.00147774	0.00713157	-0.00429797	0.00319724	0.0712891	0.0512956	-0.560852	0.577811	-107.018	0.960168	-0.379463	0.986612	FALSE		0
184						0.00271299	-0.000191176	6.66709e-05	-0.126635	FALSE	0.0222853	0.00146185	0.00437819	-0.00355956	0.0029812	0.0518781	0.0186379	-0.746264	0.820192	-107.145	0.961305	-0.379655	0.987109	FALSE		0
179.128	179.143	0.0255919	C12H18O		Oxygen containing compounds	0.00665274	-0.000186184	8.11531e-05	-0.120063	FALSE	0.0532005	0.00139677	0.0128884	-0.00449043	0.00408595	0.0639329	0.0201987	-0.69277	0.78859	-107.265	0.962382	-0.379841	0.987593	FALSE	12	-0.0965178
77.06	77.0593	0.0110085	C3H8O2	1 2-Propanediol	Oxygen containing compounds	0.0109023	-0.000186045	0.000124596	-0.0516119	FALSE	0.0375058	0.00322312	0.0201657	-0.00719335	0.00546055	0.0408882	-0.0269143	-1.56009	1.33167	-107.316	0.962845	-0.380027	0.988077	FALSE	3	-0.0241114
210						0.00278216	-0.000180307	6.84093e-05	-0.136312	TRUE	0.0260828	0.00115681	0.00474359	-0.00339005	0.00303125	0.0569893	0.00390908	-0.219656	0.239749	-107.453	0.964068	-0.380207	0.988546	FALSE		0
134						0.00360426	-0.00017633	8.0147e-05	-0.0850617	FALSE	0.0215612	0.00176569	0.00587572	-0.00426126	0.00382854	0.0479097	0.0299895	-1.11926	1.25461	-107.538	0.964831	-0.380383	0.989004	FALSE		0
125.071						0.00590451	-0.000175043	8.78468e-05	-0.0788141	FALSE	0.032968	0.000512688	0.0139982	-0.00522955	0.00408284	0.0523034	0.0550691	-1.01776	1.17318	-107.617	0.965538	-0.380558	0.98946	FALSE		0
430						0.00378774	-0.000162935	6.5026e-05	-0.252223	FALSE	0.0727111	0.00153116	0.00679646	-0.00371927	0.00335062	0.133099	-0.0080236	-0.562043	0.485037	-107.869	0.967801	-0.380721	0.989883	FALSE		0
181.159	181.158	0.0258798	C12H20O		Oxygen containing	0.0034926	-0.000161327	6.23994e-05	-0.105213	FALSE	0.0282462	0.000778391	0.00630296	-0.003613	0.00289622	0.0495122	0	0	0	-107.974	0.968745	-0.380883	0.990303	FALSE	12	-0.0836321
	181.169	0.0258813	C11H20N2		Nitrogen containing															-107.974	0.968745	-0.380883	0.990303	FALSE	11	0
106.078						0.0042209	-0.000160047	4.33036e-05	-0.0611188	FALSE	0.0199886	0.00185969	0.0100383	-0.00240713	0.00170705	0.0192981	-0.017742	-0.995674	0.98463	-108.035	0.969293	-0.381043	0.990719	TRUE		0
155.142	155.143	0.0221633	C10H18O	lilool cineol menthone	Oxygen containing compounds	0.00583428	-0.000155258	7.93893e-05	-0.0867135	FALSE	0.0404081	0.00109856	0.0116409	-0.004891	0.00374414	0.0604059	0.0438409	-0.408607	0.577381	-108.122	0.970071	-0.381198	0.991122	FALSE	10	-0.0670716
176						0.0025239	-0.000142888	6.83123e-05	-0.090534	FALSE	0.0198306	0.00125539	0.00409164	-0.00397663	0.00330757	0.0532908	-0.0605736	-0.935363	0.754761	-108.212	0.970884	-0.381341	0.991494	FALSE		0
237						0.000677554	-0.000139296	7.32151e-05	-0.118848	FALSE	0.00716876	-0.00367176	0.00391279	-0.00367782	0.00355609	0.076532	0.0603811	-0.968957	1.12364	-108.331	0.97195	-0.38148	0.991856	FALSE		0
196						0.00307213	-0.000132795	7.57284e-05	-0.0937001	FALSE	0.0268811	0.0014082	0.00517978	-0.00440192	0.00384282	0.0660539	-0.0888074	-1.38325	0.925499	-108.425	0.972791	-0.381613	0.992201	FALSE		0
137.047	137.059	0.0195799	C8H8O2		Oxygen containing compounds	0.00391872	-0.000130071	5.61544e-05	-0.064173	FALSE	0.0239754	0.00145344	0.00760063	-0.00313725	0.00263848	0.0351752	-0.0593828	-0.925945	0.698968	-108.489	0.973366	-0.381743	0.99254	FALSE	8	-0.0449525
334						0.00144513	-0.00012966	4.48473e-05	-0.155903	FALSE	0.0215479	0.000679152	0.00217011	-0.00253659	0.00226849	0.0649151	0.00213778	-0.113726	0.119423	-108.645	0.974765	-0.381873	0.992877	FALSE		0
433						0.00164156	-0.000127993	3.63277e-05	-0.199516	FALSE	0.0317319	0.000746582	0.0027656	-0.00212845	0.00165584	0.0679806	0.0034533	-0.623395	0.575987	-108.844	0.976555	-0.382001	0.993209	TRUE		0
252						0.00195319	-0.000121101	5.59954e-05	-0.109863	FALSE	0.0219734	0.00101304	0.00307125	-0.00292296	0.00271567	0.0589861	-0.034126	-0.786797	0.66845	-108.954	0.977541	-0.382122	0.993524	FALSE		0
431						0.00331031	-0.000120635	6.46332e-05	-0.187177	FALSE	0.0636938	0.00136685	0.00603105	-0.0033636	0.00315338	0.126772	0.0219978	-0.445824	0.507912	-109.142	0.97922	-0.382242	0.993838	FALSE		0
277						0.00291349	-0.000120069	6.8771e-05	-0.119732	FALSE	0.0360284	0.00108247	0.0053993	-0.00352925	0.00338308	0.081717	-0.00555156	-1.38804	1.29099	-109.261	0.980295	-0.382363	0.99415	FALSE		0
110.073						0.00607072	-0.000118691	7.88674e-05	-0.047033	FALSE	0.0298314	0.00158358	0.0113125	-0.00432815	0.00365984	0.0370632	0.0269934	-0.569674	0.63391	-109.308	0.980717	-0.382481	0.994459	FALSE		0
243						0.00282518	-0.0001148	7.89007e-05	-0.100427	FALSE	0.0306482	-0.000368336	0.00605928	-0.00419039	0.0037947	0.0854383	-0.00733924	-0.664595	0.672086	-109.409	0.981618	-0.382596	0.994757	FALSE		0
78.046						0.00422266	-0.000113846	5.12697e-05	-0.0319868	FALSE	0.0147126	0.00175669	0.00766859	-0.00269438	0.00245943	0.0180238	-0.00233254	-0.527724	0.520879	-109.441	0.981905	-0.38271	0.995053	FALSE		0
391						0.00168	-0.000113647	3.99524e-05	-0.159969	TRUE	0.029325	0.000749187	0.0029276	-0.00216256	0.0017151	0.0688416	0.0428159	-0.835561	1.0049	-109.601	0.98334	-0.382824	0.995349	FALSE		0
82.989	82.9883	0.0118555	H3O3P		Oxygen containing	0.00429129	-0.000102982	5.32553e-05	-0.030767	FALSE	0.0158987	0.00325689	0.00578761	-0.00329688	0.0024064	0.0203167	0.133674	-0.559508	0.971796	-109.631	0.983616	-0.382926	0.995616	FALSE		0
216						0.0016842	-9.84563e-05	4.59177e-05	-0.0765596	FALSE	0.0162405	0.000898602	0.00280714	-0.00249635	0.00223674	0.0409449	0.0128402	-0.676887	0.792293	-109.708	0.984303	-0.383025	0.995872	FALSE		0
365						0.00185064	-9.60286e-05	4.04815e-05	-0.126182	FALSE	0.0301556	0.00106271	0.00289148	-0.002224	0.00158587	0.0635558	0.0032419	-0.45955	0.468001	-109.834	0.985435	-0.383121	0.996122	FALSE		0
448						0.00202364	-9.57869e-05	4.58399e-05	-0.154485	FALSE	0.0404729	0.000954189	0.00329514	-0.00244086	0.00222573	0.0917354	0.00229428	-1.39784	1.49836	-109.989	0.986821	-0.383217	0.996371	FALSE		0
320						0.00135964	-9.56184e-05	3.94164e-05	-0.110152	FALSE	0.0194235	0.00068592	0.00201481	-0.00218944	0.00187678	0.0577406	-0.0361845	-0.965526	0.825207	-110.099	0.987809	-0.383312	0.99662	FALSE		0
117.127	117.126	0.0167323	C7H16O	heptanol	Oxygen containing	0.00178454	-8.71154e-05	2.96221e-05	-0.0367328	FALSE	0.00933117	0.00054863	0.00373849	-0.00188398	0.00111394	0.0171954	-0.024353	-0.885307	0.745211	-110.136	0.988139	-0.383399	0.996846	FALSE	7	-0.0263437
336						0.00133814	-8.56672e-05	4.37378e-05	-0.103623	FALSE	0.0200722	0.000540048	0.00207038	-0.00244714	0.00226333	0.0702145	-0.0266076	-0.38708	0.325003	-110.239	0.989068	-0.383485	0.997069	FALSE		0
396						0.00150698	-8.27436e-05	2.88861e-05	-0.117959	FALSE	0.0266412	0.00087985	0.00212163	-0.00148486	0.00136736	0.0471945	0.0322076	-0.954371	1.0731	-110.357	0.990127	-0.383568	0.997284	FALSE		0
266						0.00193836	-8.09749e-05	5.31999e-05	-0.0775415	FALSE	0.023018	0.0010712	0.0030036	-0.00290921	0.00245086	0.0618742	-0.0285499	-1.28138	1.22858	-110.435	0.990822	-0.383649	0.997495	FALSE		0
212						0.00221691	-7.86304e-05	6.1843e-05	-0.0600108	FALSE	0.0209815	0.00102779	0.00362397	-0.00311166	0.00317998	0.0615991	0.0592441	-0.764223	1.08689	-110.495	0.991361	-0.383728	0.997699	FALSE		0
388						0.00150709	-7.75231e-05	3.27409e-05	-0.108284	FALSE	0.026105	0.000786026	0.00222255	-0.00162901	0.00140199	0.0519115	0.0504883	-0.642308	0.878409	-110.603	0.992332	-0.383805	0.997901	FALSE		0
104.062	104.049	0.0148642	C7H5N	benzonitrile	Nitrogen containing	0.00256915	-7.39429e-05	2.95679e-05	-0.0277007	FALSE	0.0119353	0.0014669	0.00441628	-0.00153929	0.00134107	0.0136118	0.0140207	-0.41892	0.475932	-110.631	0.992581	-0.383879	0.998093	FALSE	7	-0.0223603
	104.07	0.0148672	C4H9NO2		Nitrogen containing compounds															-110.631	0.992581	-0.383879	0.998093	FALSE	4	0
198						0.00242816	-7.3891e-05	6.83626e-05	-0.0526695	FALSE	0.0214632	0.000961605	0.00409384	-0.00378781	0.00326718	0.0589879	-0.0411827	-1.01251	0.905629	-110.683	0.993054	-0.383953	0.998285	FALSE		0
403						0.00138098	-7.19303e-05	2.98076e-05	-0.104356	FALSE	0.0248453	0.000760485	0.00206012	-0.00166523	0.00139996	0.0541311	-0.00398789	-0.755205	0.790395	-110.788	0.99399	-0.384025	0.998472	FALSE		0
120.081	120.08	0.0171543	C8H9N		Nitrogen containing	0.0025252	-6.90772e-05	2.62098e-05	-0.0298615	FALSE	0.013537	0.000964388	0.00562299	-0.00133511	0.000931253	0.0131451	-0.0154095	-1.13167	1.06431	-110.818	0.994258	-0.384094	0.998652	FALSE	8	-0.0238731
	120.088	0.0171555	C9H1013C																	-110.818	0.994258	-0.384094	0.998652	FALSE	9	0
463						0.00130766	-6.63853e-05	2.51252e-05	-0.110651	FALSE	0.027029	0.000702773	0.00194123	-0.00118911	0.0010116	0.0417217	0.0113753	-1.25556	1.31125	-110.928	0.99525	-0.38416	0.998824	FALSE		0
275						0.00222001	-6.42379e-05	7.39274e-05	-0.0635955	FALSE	0.0272546	-1.70511e-05	0.00501633	-0.00394969	0.00387273	0.0905479	0.0407691	-0.860738	0.919295	-110.992	0.995821	-0.384224	0.998991	FALSE		0
183.047	183.047	0.0261496	C9H10O2S		Oxygen containing	0.00167577	-6.21923e-05	3.37502e-05	-0.0409828	FALSE	0.013694	0.000752033	0.00302558	-0.00188011	0.00162921	0.0284974	-0.0256375	-0.544017	0.43215	-111.033	0.996189	-0.384287	0.999153	FALSE	9	-0.0241804
415						0.00146089	-5.98175e-05	3.69065e-05	-0.0893674	FALSE	0.0270656	0.000773942	0.0022477	-0.00184358	0.00176496	0.0688498	-0.0495028	-0.797883	0.58556	-111.122	0.996991	-0.384347	0.999309	FALSE		0
411						0.00120386	-5.33539e-05	2.54498e-05	-0.0789424	FALSE	0.0220886	0.000746316	0.0017742	-0.00125967	0.00114769	0.044902	-0.0134002	-0.269486	0.225187	-111.201	0.997699	-0.3844	0.999447	FALSE		0
89.096	89.0953	0.0127279	C5H12O	pentanol or methyl butanol	Oxygen containing	0.00396952	-4.74678e-05	5.62e-05	-0.0152251	FALSE	0.0157887	0.000711227	0.00866665	-0.00266384	0.00266759	0.0220876	0.0731018	-0.668934	0.917997	-111.216	0.997835	-0.384447	0.999571	FALSE	5	-0.010253
214						0.0017547	-4.48698e-05	5.53481e-05	-0.0345677	FALSE	0.0167636	0.000422069	0.00317972	-0.0028787	0.00270597	0.0497157	0.0714123	-1.47959	1.89137	-111.251	0.998146	-0.384492	0.999687	FALSE		0
464						0.00136816	-4.42877e-05	2.2719e-05	-0.0739781	FALSE	0.0283404	0.000796995	0.00201516	-0.0011763	0.00103161	0.0460869	0.0931611	-0.415829	0.649836	-111.325	0.998809	-0.384536	0.999803	FALSE		0
506						0.00135294	-4.39349e-05	2.4194e-05	-0.0800318	FALSE	0.030562	0.000727596	0.00203446	-0.0012496	0.00121322	0.0531196	-0.00444826	-1.36623	1.61283	-111.405	0.999527	-0.38458	0.999917	FALSE		0
457						0.00109828	-3.20189e-05	1.63718e-05	-0.0526775	TRUE	0.0224068	0.000655461	0.00164475	-0.000827914	0.000708398	0.0314091	0.306035	-0.20797	1.05536	-111.458	1	-0.384612	1	FALSE		0
