# Supplementary material for: Volatile organic compound fluxes over a winter wheat field byPTR-Qi-TOF-MS and eddy covariance
Source: Copernicus journal article supplement (doi:10.5194/acp-2020-1328), 2021-01-13
Supplement: Supplementary file 2 [file COV3ER_2016_dataset-Correlation-Analysis.0.9.EN150.xlsx]

## Sheet: rescorranalysis.0.9.EN150
	Mass1	Mass2	MassDifference	MassSum	CorrelationType	intercept	slope	corr	resolution
1	31.018	31.029	0.011	62.047	Resolution	-0.141014	0.714679	0.995909	0.015509
6	33.033	33.045	0.012	66.078	Resolution	-0.0778051	0.755398	0.994668	0.0165165
13	31.029	43.018	11.989	74.047	C	-1.16395	3.55299	0.90097	0.0155145
18	41.002	44.062	3.06	85.064	Unkwnown	-0.0112202	1.33892	0.90339	0.020501
19	41.039	44.062	3.023	85.101	Isotope-3	0.00431621	0.016676	0.921301	0.0205195
20	31.018	45.033	14.015	76.051	CH2	-1.39241	2.13627	0.907443	0.015509
21	31.029	45.033	14.004	76.062	CH2	-0.97311	2.99218	0.915389	0.0155145
25	43.018	45.033	2.015	88.051	Isotope-2	0.108193	0.770557	0.917522	0.021509
32	45.033	47.037	2.004	92.07	Isotope-2	0.0301405	0.0991371	0.904379	0.0225165
37	47.037	47.049	0.012	94.086	Resolution	-0.00766415	0.739573	0.933217	0.0235185
41	47.037	47.06	0.023	94.097	Resolution	-0.00619421	0.621103	0.923627	0.0235185
42	47.049	47.06	0.011	94.109	Resolution	-0.000631667	0.848354	0.999186	0.0235245
53	31.018	57.033	26.015	88.051	C2H2	-0.119172	0.171094	0.91591	0.015509
54	31.029	57.033	26.004	88.062	C2H2	-0.0858472	0.239998	0.923866	0.0155145
58	43.018	57.033	14.015	100.051	CH2	-0.00049157	0.0627784	0.946657	0.021509
59	45.033	57.033	12	102.066	C	-0.00091971	0.0744585	0.954096	0.0225165
62	41.039	57.07	16.031	98.109	Unkwnown	-0.0132022	0.463995	0.965022	0.0205195
71	45.033	59.049	14.016	104.082	CH2	-0.188199	2.00799	0.9052	0.0225165
79	59.049	59.086	0.037	118.135	Resolution	0.0239079	0.02925	0.933602	0.0295245
80	43.018	61.028	18.01	104.046	H2O	-0.0571991	0.357824	0.942187	0.021509
86	43.018	61.065	18.047	104.083	Unkwnown	0.00430331	0.0187076	0.91844	0.021509
89	61.028	61.065	0.037	122.093	Resolution	0.00875297	0.0490235	0.915244	0.030514
97	41.039	68.049	27.01	109.088	Unkwnown	-0.000186599	0.022083	0.941314	0.0205195
98	44.062	68.049	23.987	112.111	Unkwnown	-0.00325659	1.1831	0.901486	0.022031
100	57.07	68.049	10.979	125.119	Unkwnown	0.000948992	0.0462867	0.950491	0.028535
111	41.039	69.07	28.031	110.109	Unkwnown	-0.024844	0.292423	0.968823	0.0205195
115	57.07	69.07	12	126.14	C	-0.0103187	0.614248	0.980893	0.028535
116	68.049	69.07	1.021	137.119	Isotope-1	-0.00597443	12.3754	0.965917	0.0340245
125	41.039	71.086	30.047	112.125	Unkwnown	0.0160508	0.193038	0.901864	0.0205195
127	57.07	71.086	14.016	128.156	CH2	0.0161125	0.43002	0.960439	0.028535
128	68.049	71.086	3.037	139.135	Isotope-3	0.0253322	8.33715	0.915377	0.0340245
129	69.07	71.086	2.016	140.156	Isotope-2	0.0309523	0.666699	0.938369	0.034535
147	75.044	75.068	0.024	150.112	Resolution	0.00167077	0.0892521	0.938366	0.037522
153	41.039	77.06	36.021	118.099	Unkwnown	4.91732e-05	0.0310836	0.901842	0.0205195
154	44.062	77.06	32.998	121.122	Unkwnown	-0.00561027	1.7367	0.909371	0.022031
159	68.049	77.06	9.011	145.109	Unkwnown	0.00178599	1.32967	0.914458	0.0340245
174	53.026	79.054	26.028	132.08	C2H2	-0.0235747	3.4718	0.917044	0.026513
190	65.02	80.049	15.029	145.069	Unkwnown	-0.00653952	1.55852	0.900863	0.03251
195	79.054	80.049	0.995	159.103	Isotope-1	-0.00106395	0.103312	0.917468	0.039527
200	81.07	82.078	1.008	163.148	Isotope-1	0.0034788	0.0840573	0.981047	0.040535
205	41.039	83	41.961	124.039	Unkwnown	0.0313542	0.284159	0.948933	0.0205195
211	57.07	83	25.93	140.07	Unkwnown	0.0465778	0.594033	0.955931	0.028535
212	68.049	83	14.951	151.049	Unkwnown	0.0546729	11.7623	0.926216	0.0340245
214	69.07	83	13.93	152.07	Unkwnown	0.0559886	0.96958	0.976927	0.034535
224	45.033	83.01	37.977	128.043	Unkwnown	0.00259212	0.00647598	0.917264	0.0225165
231	69.033	83.01	13.977	152.043	CH2	-3.93439e-05	0.267309	0.909656	0.0345165
242	45.033	83.049	38.016	128.082	Unkwnown	0.0105325	0.0550596	0.922558	0.0225165
245	57.033	83.049	26.016	140.082	C2H2	0.0148624	0.698049	0.906377	0.0285165
247	69.033	83.049	14.016	152.082	CH2	-0.013234	2.30859	0.926429	0.0345165
253	83.01	83.049	0.039	166.059	Resolution	-0.00859927	8.22091	0.968375	0.041505
254	41.039	83.086	42.047	124.125	Unkwnown	-0.0096288	0.212346	0.93177	0.0205195
258	57.07	83.086	26.016	140.156	C2H2	-0.00467427	0.460447	0.970477	0.028535
259	68.049	83.086	15.037	151.135	Unkwnown	0.00186867	9.10301	0.937571	0.0340245
260	69.07	83.086	14.016	152.156	CH2	0.00396274	0.745658	0.984277	0.034535
261	71.086	83.086	12	154.172	C	-0.00619859	0.98485	0.935786	0.035543
265	83	83.086	0.086	166.086	Unkwnown	-0.0340012	0.750677	0.985447	0.0415
268	54.947	83.911	28.964	138.858	Unkwnown	-3.59262e-05	0.995045	0.968053	0.0274735
271	41.039	84.081	43.042	125.12	Unkwnown	-0.0013735	0.0232335	0.948252	0.0205195
278	57.07	84.081	27.011	141.151	Unkwnown	-0.000184435	0.0487128	0.959258	0.028535
279	68.049	84.081	16.032	152.13	Unkwnown	0.000211051	0.978731	0.941794	0.0340245
281	69.07	84.081	15.011	153.151	Unkwnown	0.000637872	0.0792873	0.977731	0.034535
282	71.086	84.081	12.995	155.167	Unkwnown	0.000145185	0.101511	0.902766	0.035543
288	83	84.081	1.081	167.081	Unkwnown	-0.00359387	0.0805243	0.988116	0.0415
291	83.086	84.081	0.995	167.167	Isotope-1	0.000469661	0.104878	0.980971	0.041543
296	31.029	85.065	54.036	116.094	Unkwnown	-0.019352	0.0920645	0.905996	0.0155145
299	41.039	85.065	44.026	126.104	Unkwnown	0.00738897	0.0462208	0.9171	0.0205195
302	45.033	85.065	40.032	130.098	Unkwnown	0.0137838	0.0280967	0.926673	0.0225165
305	57.033	85.065	28.032	142.098	C2H4	0.014914	0.36846	0.941763	0.0285165
310	69.033	85.065	16.032	154.098	Unkwnown	0.00327332	1.1364	0.900618	0.0345165
317	83	85.065	2.065	168.065	Unkwnown	0.00444352	0.154887	0.927792	0.0415
319	83.049	85.065	2.016	168.114	Isotope-2	0.0118643	0.465057	0.919933	0.0415245
321	84.081	85.065	0.984	169.146	Isotope-1	0.0123384	1.87104	0.915497	0.0420405
324	57.07	85.101	28.031	142.171	C2H4	0.00978399	0.272195	0.948584	0.028535
326	69.07	85.101	16.031	154.171	Unkwnown	0.019415	0.420968	0.924439	0.034535
327	71.086	85.101	14.015	156.187	CH2	-0.00122777	0.637423	0.995083	0.035543
329	83.086	85.101	2.015	168.187	Isotope-2	0.0178858	0.560492	0.933148	0.041543
333	86.036	86.06	0.024	172.096	Resolution	0.00161683	1.21381	0.981618	0.043018
338	57.07	86.096	29.026	143.166	Unkwnown	-0.00153947	0.0260652	0.931944	0.028535
339	68.049	86.096	18.047	154.145	H2O	-0.00138275	0.5266	0.920525	0.0340245
340	69.07	86.096	17.026	155.166	Unkwnown	-0.000695146	0.0406531	0.912589	0.034535
341	71.086	86.096	15.01	157.182	Unkwnown	-0.00243453	0.0601684	0.966518	0.035543
344	83.086	86.096	3.01	169.182	Isotope-3	-0.000748073	0.0535829	0.911687	0.041543
346	85.101	86.096	0.995	171.197	Isotope-1	-0.00222025	0.0935412	0.962714	0.0425505
351	43.018	87.044	44.026	130.062	Unkwnown	0.00500981	0.0321349	0.904652	0.021509
352	45.033	87.044	42.011	132.077	Unkwnown	0.00407086	0.0387155	0.925792	0.0225165
355	57.033	87.044	30.011	144.077	Unkwnown	0.00607439	0.502652	0.945561	0.0285165
361	83.01	87.044	4.034	170.054	Isotope-4	-0.00470739	5.32836	0.913826	0.041505
362	83.049	87.044	3.995	170.093	Isotope-4	0.0019579	0.633854	0.92207	0.0415245
371	45.033	87.08	42.047	132.113	Unkwnown	-0.00277152	0.0200959	0.937665	0.0225165
374	59.049	87.08	28.031	146.129	C2H4	0.00107375	0.00912148	0.934658	0.0295245
378	73.065	87.08	14.015	160.145	CH2	0.00340615	0.0933382	0.923118	0.0365325
381	80.049	87.08	7.031	167.129	Unkwnown	0.00149334	1.00111	0.90631	0.0400245
383	83.01	87.08	4.07	170.09	Unkwnown	-0.00739502	2.77225	0.921981	0.041505
384	83.049	87.08	4.031	170.129	Isotope-4	-0.0036008	0.325509	0.917994	0.0415245
387	87.044	87.08	0.036	174.124	Resolution	-0.00237069	0.469156	0.910186	0.043522
391	89.023	89.042	0.019	178.065	Resolution	-0.00561542	2.87418	0.908888	0.0445115
393	89.042	89.06	0.018	178.102	Resolution	-0.00400669	1.14409	0.988541	0.044521
395	89.06	89.096	0.036	178.156	Resolution	-0.00367405	0.208604	0.91975	0.04453
402	68.049	91.039	22.99	159.088	Unkwnown	-0.0516964	10.3172	0.903166	0.0340245
406	77.06	91.039	13.979	168.099	CH2	-0.0566248	7.42777	0.940196	0.03853
418	68.049	91.05	23.001	159.099	Unkwnown	-0.0636504	12.1332	0.90502	0.0340245
422	77.06	91.05	13.99	168.11	CH2	-0.0693334	8.73101	0.94079	0.03853
427	91.039	91.05	0.011	182.089	Resolution	-0.00240936	1.17292	0.999023	0.0455195
433	68.049	91.058	23.009	159.107	Unkwnown	-0.066966	12.546	0.9046	0.0340245
437	77.06	91.058	13.998	168.118	CH2	-0.0729128	9.03071	0.940401	0.03853
442	91.039	91.058	0.019	182.097	Resolution	-0.00358451	1.21243	0.998038	0.0455195
443	91.05	91.058	0.008	182.108	Resolution	-0.00123895	1.03456	0.999802	0.045525
459	91.039	92.062	1.023	183.101	Isotope-1	-0.000919885	0.157142	0.91711	0.0455195
460	91.05	92.062	1.012	183.112	Isotope-1	-0.000266814	0.131985	0.904285	0.045525
476	77.06	93.07	16.01	170.13	Unkwnown	-0.0871459	36.152	0.954867	0.03853
478	91.039	93.07	2.031	184.109	Isotope-2	0.236264	4.53402	0.947903	0.0455195
479	91.05	93.07	2.02	184.12	Isotope-2	0.244213	3.87382	0.950616	0.045525
480	91.058	93.07	2.012	184.128	Isotope-2	0.248178	3.74836	0.951622	0.045529
482	93.033	93.07	0.037	186.103	Resolution	0.0860027	0.319365	0.921762	0.0465165
490	93.033	94.041	1.008	187.074	Isotope-1	0.00818388	0.0755681	0.994068	0.0465165
491	93.07	94.041	0.971	187.111	Isotope-1	0.0218489	0.198271	0.928877	0.046535
502	77.06	95.049	17.989	172.109	H2O	0.0334273	12.8608	0.923052	0.03853
507	91.039	95.049	4.01	186.088	Isotope-4	0.152411	1.58554	0.906949	0.0455195
508	91.05	95.049	3.999	186.099	Isotope-4	0.152943	1.36821	0.918358	0.045525
509	91.058	95.049	3.991	186.107	Isotope-4	0.153759	1.32732	0.921844	0.045529
510	93.033	95.049	2.016	188.082	Isotope-2	0.0665751	0.124954	0.978952	0.0465165
511	93.07	95.049	1.979	188.119	Isotope-2	0.0787318	0.339616	0.941982	0.046535
512	94.041	95.049	1.008	189.09	Isotope-1	0.0509415	1.66416	0.977797	0.0470205
517	57.07	95.086	38.016	152.156	Unkwnown	-0.00578989	0.672446	0.922862	0.028535
518	68.049	95.086	27.037	163.135	Unkwnown	-0.0034528	13.6757	0.91603	0.0340245
519	69.07	95.086	26.016	164.156	C2H2	0.0157697	1.04977	0.906001	0.034535
520	71.086	95.086	24	166.172	Unkwnown	-0.0200731	1.50415	0.927423	0.035543
522	82.078	95.086	13.008	177.164	Unkwnown	0.0320414	7.73244	0.912986	0.041039
526	85.101	95.086	9.985	180.187	Unkwnown	-0.012219	2.31681	0.915409	0.0425505
527	86.096	95.086	8.99	181.182	Unkwnown	0.0535759	23.5087	0.90026	0.043048
531	41.039	96.057	55.018	137.096	Unkwnown	0.00163943	0.0260843	0.910428	0.0205195
534	57.07	96.057	38.987	153.127	Unkwnown	0.00254515	0.0557956	0.937463	0.028535
535	68.049	96.057	28.008	164.106	C2H4	0.00200041	1.17377	0.960886	0.0340245
536	69.07	96.057	26.987	165.127	Unkwnown	0.00400401	0.0885498	0.931849	0.034535
537	71.086	96.057	24.971	167.143	Unkwnown	0.00179706	0.122418	0.926027	0.035543
540	77.06	96.057	18.997	173.117	Unkwnown	0.00326746	0.777214	0.927014	0.03853
546	85.101	96.057	10.956	181.158	Unkwnown	0.00267342	0.186505	0.903429	0.0425505
547	86.096	96.057	9.961	182.153	Unkwnown	0.00739715	1.95922	0.918285	0.043048
548	91.039	96.057	5.018	187.096	Unkwnown	0.0102934	0.096965	0.918894	0.0455195
549	91.05	96.057	5.007	187.107	Unkwnown	0.0104024	0.0832139	0.925932	0.045525
550	91.058	96.057	4.999	187.115	Unkwnown	0.0104721	0.0806095	0.928236	0.045529
552	93.07	96.057	2.987	189.127	Isotope-3	0.00683039	0.0195938	0.910644	0.046535
554	95.049	96.057	1.008	191.106	Isotope-1	0.00249908	0.0571385	0.952945	0.0475245
555	95.086	96.057	0.971	191.143	Isotope-1	0.00509695	0.0748609	0.927948	0.047543
562	45.033	97.04	52.007	142.073	Unkwnown	0.0150812	0.0328652	0.904845	0.0225165
564	57.033	97.04	40.007	154.073	Unkwnown	0.0170366	0.423806	0.907359	0.0285165
566	69.033	97.04	28.007	166.073	C2H4	-0.00154302	1.44081	0.954685	0.0345165
571	83.01	97.04	14.03	180.05	CH2	0.0057236	4.70757	0.917432	0.041505
572	83.049	97.04	13.991	180.089	CH2	0.0119277	0.555876	0.919276	0.0415245
574	85.065	97.04	11.975	182.105	C	0.00279024	1.08884	0.913201	0.0425325
576	87.08	97.04	9.96	184.12	Unkwnown	0.0212677	1.55763	0.913966	0.04354
581	41.039	97.065	56.026	138.104	Unkwnown	0.00122334	0.0723338	0.930689	0.0205195
588	57.07	97.065	39.995	154.135	Unkwnown	0.00715842	0.145909	0.907347	0.028535
592	69.033	97.065	28.032	166.098	C2H4	-0.00652155	1.81201	0.925117	0.0345165
593	69.07	97.065	27.995	166.135	C2H4	0.00911474	0.239708	0.933652	0.034535
600	83	97.065	14.065	180.065	Unkwnown	-0.0055101	0.250053	0.967622	0.0415
602	83.049	97.065	14.016	180.114	CH2	0.00833376	0.726399	0.926056	0.0415245
603	83.086	97.065	13.979	180.151	CH2	0.00900126	0.314807	0.930085	0.041543
604	84.081	97.065	12.984	181.146	Unkwnown	0.00773822	2.99382	0.945137	0.0420405
605	85.065	97.065	12	182.13	C	-0.00618645	1.4773	0.954471	0.0425325
616	97.04	97.065	0.025	194.105	Resolution	-0.00132869	1.19783	0.923354	0.04852
619	57.07	97.101	40.031	154.171	Unkwnown	-0.0146361	0.379841	0.964399	0.028535
620	68.049	97.101	29.052	165.15	Unkwnown	-0.00976515	7.53726	0.934184	0.0340245
621	69.07	97.101	28.031	166.171	C2H4	-0.00611352	0.608998	0.969123	0.034535
622	71.086	97.101	26.015	168.187	C2H2	-0.0212889	0.841911	0.960349	0.035543
625	83	97.101	14.101	180.101	Unkwnown	-0.033501	0.600044	0.951235	0.0415
626	83.086	97.101	14.015	180.187	CH2	-0.00972827	0.818898	0.987027	0.041543
627	84.081	97.101	13.02	181.182	Unkwnown	-0.00537517	7.3799	0.950027	0.0420405
629	85.101	97.101	12	182.202	C	-0.0193064	1.31768	0.962168	0.0425505
630	86.096	97.101	11.005	183.197	Unkwnown	0.0195735	13.2005	0.934227	0.043048
635	95.086	97.101	2.015	192.187	Isotope-2	0.00896002	0.485254	0.912994	0.047543
636	96.057	97.101	1.044	193.158	Isotope-1	-0.0128807	6.01954	0.911524	0.0480285
646	31.029	99.08	68.051	130.109	Unkwnown	-0.0207899	0.0789731	0.900286	0.0155145
649	41.039	99.08	58.041	140.119	Unkwnown	0.00147279	0.0404292	0.927911	0.0205195
655	57.033	99.08	42.047	156.113	Unkwnown	0.00913707	0.310011	0.917051	0.0285165
659	69.07	99.08	30.01	168.15	Unkwnown	0.00674928	0.130185	0.907193	0.034535
665	83	99.08	16.08	182.08	Unkwnown	-0.000538443	0.13344	0.925345	0.0415
669	84.081	99.08	14.999	183.161	Unkwnown	0.00586702	1.63313	0.923969	0.0420405
670	85.065	99.08	14.015	184.145	CH2	-0.00389091	0.851495	0.984996	0.0425325
682	97.065	99.08	2.015	196.145	Isotope-2	0.00303113	0.523791	0.939924	0.0485325
686	41.039	99.092	58.053	140.131	Unkwnown	0.0021238	0.0522718	0.933697	0.0205195
692	57.07	99.092	42.022	156.162	Unkwnown	0.00473985	0.109749	0.944466	0.028535
693	68.049	99.092	31.043	167.141	Unkwnown	0.00689179	2.13842	0.903338	0.0340245
695	69.07	99.092	30.022	168.162	Unkwnown	0.00734959	0.175314	0.947903	0.034535
696	71.086	99.092	28.006	170.178	C2H4	0.00334961	0.240351	0.931112	0.035543
699	83	99.092	16.092	182.092	Unkwnown	-0.00176552	0.177177	0.95367	0.0415
701	83.086	99.092	16.006	182.178	Unkwnown	0.00720715	0.230581	0.946068	0.041543
702	84.081	99.092	15.011	183.173	Unkwnown	0.00670506	2.17024	0.952043	0.0420405
703	85.065	99.092	14.027	184.157	CH2	-0.00278059	1.05806	0.948608	0.0425325
704	85.101	99.092	13.991	184.193	CH2	0.00412211	0.374386	0.928246	0.0425505
705	86.096	99.092	12.996	185.188	Unkwnown	0.0149417	3.77706	0.911096	0.043048
713	97.065	99.092	2.027	196.157	Isotope-2	0.0045696	0.670466	0.93337	0.0485325
714	97.101	99.092	1.991	196.193	Isotope-2	0.0112412	0.271828	0.926715	0.0485505
715	99.08	99.092	0.012	198.172	Resolution	0.00199362	1.24426	0.964327	0.04954
716	41.039	99.104	58.065	140.143	Unkwnown	0.00262317	0.0550262	0.90611	0.0205195
718	57.07	99.104	42.034	156.174	Unkwnown	0.00363917	0.120008	0.948825	0.028535
720	69.07	99.104	30.034	168.174	Unkwnown	0.00709418	0.189067	0.940683	0.034535
721	71.086	99.104	28.018	170.19	C2H4	0.000722649	0.270444	0.960882	0.035543
723	83	99.104	16.104	182.104	Unkwnown	-0.00210966	0.188817	0.935754	0.0415
724	83.086	99.104	16.018	182.19	Unkwnown	0.00646836	0.251381	0.948826	0.041543
725	84.081	99.104	15.023	183.185	Unkwnown	0.00681354	2.31835	0.935695	0.0420405
727	85.101	99.104	14.003	184.205	CH2	0.00114624	0.425121	0.966878	0.0425505
728	86.096	99.104	13.008	185.2	Unkwnown	0.0140425	4.21778	0.935013	0.043048
733	97.101	99.104	2.003	196.205	Isotope-2	0.0100334	0.302618	0.948156	0.0485505
734	99.08	99.104	0.024	198.184	Resolution	0.00376853	1.27465	0.908554	0.04954
735	99.092	99.104	0.012	198.196	Resolution	-0.000580766	1.07314	0.985711	0.049546
738	57.07	99.117	42.047	156.187	Unkwnown	0.00218872	0.112158	0.929352	0.028535
740	69.07	99.117	30.047	168.187	Unkwnown	0.00603205	0.174008	0.908611	0.034535
741	71.086	99.117	28.031	170.203	C2H4	-0.00230535	0.262413	0.975239	0.035543
743	83.086	99.117	16.031	182.203	Unkwnown	0.00537234	0.231839	0.918366	0.041543
746	85.101	99.117	14.016	184.218	CH2	-0.00211543	0.41441	0.986274	0.0425505
747	86.096	99.117	13.021	185.213	Unkwnown	0.0108393	4.06684	0.94478	0.043048
751	97.101	99.117	2.016	196.218	Isotope-2	0.00765569	0.286655	0.941311	0.0485505
753	99.092	99.117	0.025	198.209	Resolution	-0.000901446	0.984916	0.947867	0.049546
754	99.104	99.117	0.013	198.221	Resolution	-0.00154547	0.941219	0.98565	0.049552
760	45.033	101.06	56.027	146.093	Unkwnown	0.000335105	0.029031	0.921182	0.0225165
763	57.033	101.06	44.027	158.093	Unkwnown	0.00203027	0.374728	0.933915	0.0285165
768	83.01	101.06	18.05	184.07	H2O	-0.0060609	3.97746	0.903716	0.041505
769	83.049	101.06	18.011	184.109	H2O	-0.00103202	0.472453	0.910399	0.0415245
771	87.044	101.06	14.016	188.104	CH2	-0.00242429	0.744034	0.986288	0.043522
772	87.08	101.06	13.98	188.14	CH2	0.00687154	1.3255	0.906195	0.04354
777	31.018	101.096	70.078	132.114	Unkwnown	-0.017166	0.0242637	0.910497	0.015509
778	31.029	101.096	70.067	132.125	Unkwnown	-0.0124103	0.0339943	0.916213	0.0155145
784	45.033	101.096	56.063	146.129	Unkwnown	-0.000136057	0.010342	0.934744	0.0225165
787	57.033	101.096	44.063	158.129	Unkwnown	0.000420189	0.134033	0.938347	0.0285165
794	73.065	101.096	28.031	174.161	C2H4	0.0031264	0.0475998	0.908686	0.0365325
798	83.01	101.096	18.086	184.106	Unkwnown	-0.0026328	1.43804	0.916426	0.041505
799	83.049	101.096	18.047	184.145	H2O	-0.000578891	0.167728	0.9074	0.0415245
802	85.065	101.096	16.031	186.161	Unkwnown	-0.00419589	0.34669	0.949792	0.0425325
803	87.044	101.096	14.052	188.14	CH2	-0.000275751	0.248311	0.923647	0.043522
804	87.08	101.096	14.016	188.176	CH2	0.00178861	0.491191	0.942166	0.04354
805	97.04	101.096	4.056	198.136	Isotope-4	-0.00297999	0.279708	0.915586	0.04852
806	97.065	101.096	4.031	198.161	Isotope-4	-0.00132573	0.212451	0.901123	0.0485325
808	99.08	101.096	2.016	200.176	Isotope-2	-0.0021598	0.394758	0.935132	0.04954
811	101.06	101.096	0.036	202.156	Resolution	0.000588622	0.332159	0.93181	0.05053
841	101.096	102.068	0.972	203.164	Isotope-1	-0.00228224	0.405491	0.93374	0.050548
847	43.018	103.032	60.014	146.05	Unkwnown	0.000538766	0.0054562	0.913841	0.021509
849	45.033	103.032	57.999	148.065	Unkwnown	0.000634907	0.00635982	0.905619	0.0225165
851	57.033	103.032	45.999	160.065	Unkwnown	0.000692297	0.0856546	0.944033	0.0285165
862	85.065	103.032	17.967	188.097	H2O	-0.00201645	0.216464	0.933075	0.0425325
865	87.044	103.032	15.988	190.076	Unkwnown	0.000400087	0.155656	0.912293	0.043522
870	99.08	103.032	3.952	202.112	Isotope-4	-0.000664688	0.244269	0.910535	0.04954
872	101.06	103.032	1.972	204.092	Isotope-2	0.00109499	0.20385	0.900928	0.05053
873	101.096	103.032	1.936	204.128	Isotope-2	0.00106455	0.586666	0.923758	0.050548
879	43.018	103.042	60.024	146.06	Unkwnown	0.00186469	0.00701928	0.92115	0.021509
882	57.033	103.042	46.009	160.075	Unkwnown	0.00224185	0.108154	0.933425	0.0285165
891	85.065	103.042	17.977	188.107	H2O	-0.000914146	0.267746	0.903619	0.0425325
904	103.032	103.042	0.01	206.074	Resolution	0.00150638	1.24585	0.975405	0.051516
908	89.042	103.075	14.033	192.117	CH2	0.00189067	0.296478	0.903932	0.044521
911	103.042	103.075	0.033	206.117	Resolution	-0.000871868	1.21648	0.913696	0.051521
915	104.047	104.049	0.002	208.096	Resolution	5.31931e-05	1.01937	0.999586	0.0520235
916	104.047	104.062	0.015	208.109	Resolution	-7.37514e-05	1.01239	0.996516	0.0520235
917	104.049	104.062	0.013	208.111	Resolution	-0.000126107	0.99296	0.996735	0.0520245
921	105.037	105.057	0.02	210.094	Resolution	-0.0478976	1.4855	0.944721	0.0525185
926	105.057	105.07	0.013	210.127	Resolution	-0.0240096	0.946554	0.982426	0.0525285
943	107.049	107.086	0.037	214.135	Resolution	-0.046537	2.49068	0.980525	0.0535245
948	53.026	108.057	55.031	161.083	Unkwnown	-0.00396356	0.351071	0.922051	0.026513
966	92.062	108.057	15.995	200.119	Unkwnown	0.00675162	0.556369	0.916721	0.046031
974	79.054	108.081	29.027	187.135	Unkwnown	-0.00576095	0.134698	0.918292	0.039527
976	92.062	108.081	16.019	200.143	Unkwnown	0.00385125	0.809775	0.912202	0.046031
977	106.078	108.081	2.003	214.159	Isotope-2	0.00914148	1.739	0.906318	0.053039
978	107.049	108.081	1.032	215.13	Isotope-1	0.00301485	0.265564	0.979801	0.0535245
979	107.086	108.081	0.995	215.167	Isotope-1	0.00863667	0.101369	0.950062	0.053543
980	108.057	108.081	0.024	216.138	Resolution	-0.00466193	1.38555	0.948954	0.0540285
986	106.078	108.093	2.015	214.171	Isotope-2	0.004912	1.68975	0.907155	0.053039
987	107.049	108.093	1.044	215.142	Isotope-1	-0.00115207	0.259649	0.985696	0.0535245
988	107.086	108.093	1.007	215.179	Isotope-1	0.00404711	0.101479	0.978955	0.053543
990	108.081	108.093	0.012	216.174	Resolution	-0.00375979	0.961816	0.990275	0.0540405
992	41.039	109.065	68.026	150.104	Unkwnown	-0.0142281	0.124225	0.958092	0.0205195
993	44.062	109.065	65.003	153.127	Unkwnown	-0.0290973	6.52732	0.900888	0.022031
996	57.07	109.065	51.995	166.135	Unkwnown	-0.00806701	0.260964	0.970969	0.028535
997	68.049	109.065	41.016	177.114	Unkwnown	-0.00686359	5.29162	0.960862	0.0340245
998	69.07	109.065	39.995	178.135	Unkwnown	-0.00179631	0.416582	0.971843	0.034535
999	71.086	109.065	37.979	180.151	Unkwnown	-0.00825706	0.554495	0.931092	0.035543
1004	83	109.065	26.065	192.065	Unkwnown	-0.0183191	0.40248	0.936522	0.0415
1005	83.086	109.065	25.979	192.151	C2H2	-4.91837e-05	0.535927	0.949392	0.041543
1006	84.081	109.065	24.984	193.146	Unkwnown	-0.00011826	4.98556	0.941428	0.0420405
1008	85.101	109.065	23.964	194.166	Unkwnown	-0.00471099	0.848441	0.912426	0.0425505
1009	86.096	109.065	22.969	195.161	Unkwnown	0.0186721	8.69211	0.90392	0.043048
1016	95.086	109.065	13.979	204.151	CH2	0.00528284	0.344594	0.94663	0.047543
1017	96.057	109.065	13.008	205.122	Unkwnown	-0.0108905	4.30207	0.95418	0.0480285
1018	97.065	109.065	12	206.13	C	-0.00383197	1.52154	0.912584	0.0485325
1019	97.101	109.065	11.964	206.166	C	0.00811836	0.640894	0.943021	0.0485505
1021	99.092	109.065	9.973	208.157	Unkwnown	-0.00715572	2.12058	0.918737	0.049546
1022	99.104	109.065	9.961	208.169	Unkwnown	-0.00312214	1.9186	0.907726	0.049552
1026	41.039	109.076	68.037	150.115	Unkwnown	-0.0232958	0.214949	0.939486	0.0205195
1030	57.07	109.076	52.006	166.146	Unkwnown	-0.0167247	0.462084	0.971465	0.028535
1031	68.049	109.076	41.027	177.125	Unkwnown	-0.0144778	9.36364	0.959767	0.0340245
1032	69.07	109.076	40.006	178.146	Unkwnown	-0.00592273	0.738955	0.973789	0.034535
1033	71.086	109.076	37.99	180.162	Unkwnown	-0.0198055	0.996823	0.944287	0.035543
1037	83	109.076	26.076	192.076	Unkwnown	-0.0353653	0.714423	0.939016	0.0415
1038	83.086	109.076	25.99	192.162	C2H2	-0.00526134	0.964657	0.964502	0.041543
1039	84.081	109.076	24.995	193.157	Unkwnown	-0.00313897	8.85394	0.943669	0.0420405
1041	85.101	109.076	23.975	194.177	Unkwnown	-0.0147063	1.5363	0.931952	0.0425505
1042	86.096	109.076	22.98	195.172	Unkwnown	0.0282858	15.6632	0.91873	0.043048
1047	95.086	109.076	13.99	204.162	CH2	0.004398	0.620019	0.960548	0.047543
1048	96.057	109.076	13.019	205.133	Unkwnown	-0.020676	7.5743	0.948145	0.0480285
1050	97.101	109.076	11.975	206.177	C	0.00803278	1.16419	0.966423	0.0485505
1052	99.092	109.076	9.984	208.168	Unkwnown	-0.0136959	3.72498	0.911394	0.049546
1053	99.104	109.076	9.972	208.18	Unkwnown	-0.00912611	3.42027	0.91358	0.049552
1054	99.117	109.076	9.959	208.193	Unkwnown	0.00155173	3.5232	0.900148	0.0495585
1056	109.065	109.076	0.011	218.141	Resolution	-0.00114887	1.75683	0.992089	0.0545325
1058	41.039	109.089	68.05	150.128	Unkwnown	-0.0268528	0.25894	0.921926	0.0205195
1061	57.07	109.089	52.019	166.159	Unkwnown	-0.0219382	0.564384	0.964543	0.028535
1062	68.049	109.089	41.04	177.138	Unkwnown	-0.019602	11.4582	0.954311	0.0340245
1063	69.07	109.089	40.019	178.159	Unkwnown	-0.00858216	0.901838	0.966095	0.034535
1064	71.086	109.089	38.003	180.175	Unkwnown	-0.0287801	1.23432	0.949005	0.035543
1067	83	109.089	26.089	192.089	Unkwnown	-0.0431756	0.867068	0.926969	0.0415
1068	83.086	109.089	26.003	192.175	C2H2	-0.00878987	1.18312	0.961225	0.041543
1069	84.081	109.089	25.008	193.17	Unkwnown	-0.00451226	10.7696	0.932969	0.0420405
1071	85.101	109.089	23.988	194.19	Unkwnown	-0.0230899	1.90774	0.939248	0.0425505
1072	86.096	109.089	22.993	195.185	Unkwnown	0.0304591	19.4312	0.925386	0.043048
1077	95.086	109.089	14.003	204.175	CH2	0.00066932	0.769784	0.967538	0.047543
1078	96.057	109.089	13.032	205.146	Unkwnown	-0.0276787	9.28892	0.944548	0.0480285
1080	97.101	109.089	11.988	206.19	C	0.00590072	1.43999	0.970654	0.0485505
1083	99.104	109.089	9.985	208.193	Unkwnown	-0.0131228	4.18674	0.908633	0.049552
1084	99.117	109.089	9.972	208.206	Unkwnown	-0.00198601	4.35502	0.90355	0.0495585
1085	109.065	109.089	0.024	218.154	Resolution	-0.00245332	2.14083	0.982494	0.0545325
1086	109.076	109.089	0.013	218.165	Resolution	-0.00257654	1.22794	0.997505	0.054538
1091	57.07	109.101	52.031	166.171	Unkwnown	-0.0236494	0.574389	0.951743	0.028535
1092	68.049	109.101	41.052	177.15	Unkwnown	-0.0218052	11.6895	0.94345	0.0340245
1093	69.07	109.101	40.031	178.171	Unkwnown	-0.00937375	0.914834	0.950427	0.034535
1094	71.086	109.101	38.015	180.187	Unkwnown	-0.0345675	1.27781	0.950722	0.035543
1097	83	109.101	26.101	192.101	Unkwnown	-0.0420818	0.870964	0.903922	0.0415
1098	83.086	109.101	26.015	192.187	C2H2	-0.0100743	1.20298	0.94758	0.041543
1099	84.081	109.101	25.02	193.182	Unkwnown	-0.00370433	10.8426	0.910939	0.0420405
1100	85.101	109.101	24	194.202	Unkwnown	-0.0290884	1.97851	0.942698	0.0425505
1101	86.096	109.101	23.005	195.197	Unkwnown	0.026763	20.1152	0.92759	0.043048
1106	95.086	109.101	14.015	204.187	CH2	-0.0051549	0.801111	0.973859	0.047543
1107	96.057	109.101	13.044	205.158	Unkwnown	-0.0314682	9.53524	0.939221	0.0480285
1109	97.101	109.101	12	206.202	C	0.00273474	1.48018	0.966326	0.0485505
1113	99.117	109.101	9.984	208.218	Unkwnown	-0.00610527	4.49261	0.902554	0.0495585
1114	109.065	109.101	0.036	218.166	Resolution	-0.00405453	2.18131	0.970185	0.0545325
1115	109.076	109.101	0.025	218.177	Resolution	-0.00542849	1.25883	0.990641	0.054538
1116	109.089	109.101	0.012	218.19	Resolution	-0.00375716	1.03008	0.997439	0.0545445
1119	41.039	110.06	69.021	151.099	Unkwnown	-0.00280567	0.0107933	0.930109	0.0205195
1120	44.062	110.06	65.998	154.122	Unkwnown	-0.00483389	0.606408	0.939367	0.022031
1122	54.046	110.06	56.014	164.106	Unkwnown	0.00056918	0.742736	0.907531	0.027023
1123	57.07	110.06	52.99	167.13	Unkwnown	-0.00199131	0.0219553	0.91433	0.028535
1125	68.049	110.06	42.011	178.109	Unkwnown	-0.00223489	0.463417	0.94218	0.0340245
1127	69.07	110.06	40.99	179.13	Unkwnown	-0.00149003	0.0351629	0.91727	0.034535
1130	77.06	110.06	33	187.12	Unkwnown	-0.00173211	0.306759	0.908411	0.03853
1137	84.081	110.06	25.979	194.141	C2H2	-0.00157001	0.432654	0.914648	0.0420405
1148	96.057	110.06	14.003	206.117	CH2	-0.00247545	0.372126	0.924382	0.0480285
1158	109.065	110.06	0.995	219.125	Isotope-1	-0.00136172	0.0846581	0.947764	0.0545325
1159	109.076	110.06	0.984	219.136	Isotope-1	-0.00106879	0.0467278	0.926403	0.054538
1160	109.089	110.06	0.971	219.149	Isotope-1	-0.000822442	0.0373018	0.911426	0.0545445
1163	41.039	110.073	69.034	151.112	Unkwnown	-0.00185828	0.0194381	0.932057	0.0205195
1167	57.07	110.073	53.003	167.143	Unkwnown	-0.00105115	0.0412386	0.952607	0.028535
1168	68.049	110.073	42.024	178.122	Unkwnown	-0.00115842	0.851923	0.959834	0.0340245
1169	69.07	110.073	41.003	179.143	Unkwnown	-5.6061e-05	0.0658117	0.952812	0.034535
1170	71.086	110.073	38.987	181.159	Unkwnown	-0.00140167	0.089374	0.930622	0.035543
1174	83	110.073	27.073	193.073	Unkwnown	-0.00256669	0.0632245	0.91327	0.0415
1175	83.086	110.073	26.987	193.159	Unkwnown	0.000178893	0.0849017	0.932895	0.041543
1176	84.081	110.073	25.992	194.154	C2H2	0.000157895	0.79035	0.926272	0.0420405
1178	85.101	110.073	24.972	195.174	Unkwnown	-0.00087	0.137098	0.914279	0.0425505
1179	86.096	110.073	23.977	196.169	Unkwnown	0.00269735	1.42914	0.921815	0.043048
1185	95.086	110.073	14.987	205.159	Unkwnown	0.000505228	0.056621	0.963623	0.047543
1186	96.057	110.073	14.016	206.13	CH2	-0.00182494	0.693362	0.954394	0.0480285
1188	97.101	110.073	12.972	207.174	Unkwnown	0.00132958	0.102609	0.935759	0.0485505
1190	99.092	110.073	10.981	209.165	Unkwnown	-0.000893147	0.334807	0.900486	0.049546
1194	109.065	110.073	1.008	219.138	Isotope-1	0.000121832	0.159116	0.987722	0.0545325
1195	109.076	110.073	0.997	219.149	Isotope-1	0.000340643	0.0898643	0.987414	0.054538
1196	109.089	110.073	0.984	219.162	Isotope-1	0.000638952	0.0726266	0.982747	0.0545445
1197	109.101	110.073	0.972	219.174	Isotope-1	0.00104766	0.0697848	0.976159	0.0545505
1198	110.06	110.073	0.013	220.133	Resolution	0.00368517	1.72584	0.95626	0.05503
1200	41.039	110.084	69.045	151.123	Unkwnown	-0.00220218	0.0276536	0.921315	0.0205195
1203	57.07	110.084	53.014	167.154	Unkwnown	-0.00140815	0.0595802	0.954754	0.028535
1204	68.049	110.084	42.035	178.133	Unkwnown	-0.00144205	1.22443	0.956687	0.0340245
1205	69.07	110.084	41.014	179.154	Unkwnown	4.36909e-06	0.095193	0.956014	0.034535
1206	71.086	110.084	38.998	181.17	Unkwnown	-0.00213402	0.130323	0.940845	0.035543
1210	83	110.084	27.084	193.084	Unkwnown	-0.00359438	0.0913327	0.915163	0.0415
1211	83.086	110.084	26.998	193.17	Unkwnown	0.000155877	0.123887	0.943945	0.041543
1212	84.081	110.084	26.003	194.165	C2H2	0.000376286	1.13986	0.926475	0.0420405
1214	85.101	110.084	24.983	195.185	Unkwnown	-0.00146222	0.20081	0.928551	0.0425505
1215	86.096	110.084	23.988	196.18	Unkwnown	0.003966	2.06962	0.92562	0.043048
1220	95.086	110.084	14.998	205.17	Unkwnown	0.00063334	0.0826155	0.974506	0.047543
1221	96.057	110.084	14.027	206.141	CH2	-0.00239003	0.996128	0.950857	0.0480285
1223	97.101	110.084	12.983	207.185	Unkwnown	0.0017186	0.150601	0.952218	0.0485505
1229	109.065	110.084	1.019	219.149	Isotope-1	0.000413854	0.22852	0.984071	0.0545325
1230	109.076	110.084	1.008	219.16	Isotope-1	0.000529614	0.130282	0.99284	0.054538
1231	109.089	110.084	0.995	219.173	Isotope-1	0.000854736	0.105836	0.992969	0.0545445
1232	109.101	110.084	0.983	219.185	Isotope-1	0.00137809	0.102057	0.989612	0.0545505
1233	110.06	110.084	0.024	220.144	Resolution	0.00585403	2.42927	0.933454	0.05503
1234	110.073	110.084	0.011	220.157	Resolution	0.000260043	1.43477	0.994959	0.0550365
1239	57.07	110.109	53.039	167.179	Unkwnown	-0.00265764	0.0663963	0.929761	0.028535
1240	68.049	110.109	42.06	178.158	Unkwnown	-0.00279844	1.36996	0.934615	0.0340245
1241	69.07	110.109	41.039	179.179	Unkwnown	-0.000937387	0.105443	0.925586	0.034535
1242	71.086	110.109	39.023	181.195	Unkwnown	-0.00429784	0.149773	0.9431	0.035543
1246	83.086	110.109	27.023	193.195	Unkwnown	-0.000848341	0.137679	0.916652	0.041543
1248	85.101	110.109	25.008	195.21	Unkwnown	-0.00362025	0.231597	0.934294	0.0425505
1249	86.096	110.109	24.013	196.205	Unkwnown	0.00273413	2.37598	0.9276	0.043048
1254	95.086	110.109	15.023	205.195	Unkwnown	-0.00134384	0.0958318	0.98514	0.047543
1255	96.057	110.109	14.052	206.166	CH2	-0.00417242	1.12746	0.939581	0.0480285
1257	97.101	110.109	13.008	207.21	Unkwnown	0.000422539	0.170873	0.943103	0.0485505
1261	109.065	110.109	1.044	219.174	Isotope-1	-0.000614292	0.254525	0.95732	0.0545325
1262	109.076	110.109	1.033	219.185	Isotope-1	-0.00077166	0.146868	0.97721	0.054538
1263	109.089	110.109	1.02	219.198	Isotope-1	-0.000623461	0.120416	0.985929	0.0545445
1264	109.101	110.109	1.008	219.21	Isotope-1	-0.000272077	0.117341	0.992382	0.0545505
1266	110.073	110.109	0.036	220.182	Resolution	-0.00102322	1.61393	0.97712	0.0550365
1267	110.084	110.109	0.025	220.193	Resolution	-0.0015073	1.13368	0.989657	0.055042
1278	68.049	111.092	43.043	179.141	Unkwnown	-0.00962769	6.8476	0.902914	0.0340245
1281	77.06	111.092	34.032	188.152	Unkwnown	-0.0143204	4.98265	0.947372	0.03853
1291	93.033	111.092	18.059	204.125	H2O	0.0089335	0.0442598	0.902239	0.0465165
1292	93.07	111.092	18.022	204.162	H2O	0.00844543	0.1257	0.911432	0.046535
1293	94.041	111.092	17.051	205.133	Unkwnown	0.00277159	0.592617	0.920588	0.0470205
1294	95.049	111.092	16.043	206.141	Unkwnown	-0.0133654	0.350832	0.93039	0.0475245
1295	96.057	111.092	15.035	207.149	Unkwnown	-0.0199756	5.77926	0.931215	0.0480285
1312	111.08	111.092	0.012	222.172	Resolution	0.0372564	0.554296	0.930813	0.05554
1314	41.039	111.104	70.065	152.143	Unkwnown	-0.0107829	0.139005	0.929909	0.0205195
1316	57.07	111.104	54.034	168.174	Unkwnown	-0.00738251	0.30101	0.969368	0.028535
1317	68.049	111.104	43.055	179.153	Unkwnown	-0.00600378	6.10414	0.959282	0.0340245
1318	69.07	111.104	42.034	180.174	Unkwnown	-0.000860845	0.483626	0.975502	0.034535
1319	71.086	111.104	40.018	182.19	Unkwnown	-0.0117662	0.662331	0.959837	0.035543
1323	83	111.104	28.104	194.104	Unkwnown	-0.0206328	0.469383	0.94414	0.0415
1324	83.086	111.104	28.018	194.19	C2H4	-0.000714234	0.632986	0.969003	0.041543
1325	84.081	111.104	27.023	195.185	Unkwnown	-0.000337393	5.86399	0.957507	0.0420405
1327	85.101	111.104	26.003	196.205	C2H2	-0.00866612	1.02328	0.949686	0.0425505
1328	86.096	111.104	25.008	197.2	Unkwnown	0.0200176	10.4271	0.937377	0.043048
1335	95.049	111.104	16.055	206.153	Unkwnown	0.0020056	0.282894	0.904905	0.0475245
1336	95.086	111.104	16.018	206.19	Unkwnown	0.0127613	0.378887	0.90552	0.047543
1337	96.057	111.104	15.047	207.161	Unkwnown	-0.0113829	4.99296	0.958598	0.0480285
1339	97.101	111.104	14.003	208.205	CH2	0.00761859	0.766852	0.974785	0.0485505
1341	99.092	111.104	12.012	210.196	C	-0.00988733	2.52109	0.943099	0.049546
1342	99.104	111.104	12	210.208	C	-0.00696169	2.31818	0.946451	0.049552
1343	99.117	111.104	11.987	210.221	C	0.000435531	2.38445	0.931244	0.0495585
1345	109.065	111.104	2.039	220.169	Isotope-2	0.00597145	1.11004	0.962327	0.0545325
1346	109.076	111.104	2.028	220.18	Isotope-2	0.00711695	0.629263	0.966494	0.054538
1347	109.089	111.104	2.015	220.193	Isotope-2	0.00917973	0.508691	0.962569	0.0545445
1348	109.101	111.104	2.003	220.205	Isotope-2	0.0124952	0.486515	0.952175	0.0545505
1349	110.06	111.104	1.044	221.164	Isotope-1	0.0325862	11.7713	0.908897	0.05503
1350	110.073	111.104	1.031	221.177	Isotope-1	0.00723507	6.83504	0.95355	0.0550365
1351	110.084	111.104	1.02	221.188	Isotope-1	0.00623075	4.75305	0.956783	0.055042
1352	110.109	111.104	0.995	221.213	Isotope-1	0.0158352	4.05051	0.935043	0.0550545
1353	111.092	111.104	0.012	222.196	Resolution	0.0170841	0.770488	0.940947	0.055546
1356	57.07	111.117	54.047	168.187	Unkwnown	-0.00968053	0.277586	0.965881	0.028535
1357	68.049	111.117	43.068	179.166	Unkwnown	-0.00655768	5.53128	0.939518	0.0340245
1358	69.07	111.117	42.047	180.187	Unkwnown	-0.00291955	0.442718	0.965952	0.034535
1359	71.086	111.117	40.031	182.203	Unkwnown	-0.0155993	0.621038	0.970694	0.035543
1362	83	111.117	28.117	194.117	Unkwnown	-0.0212831	0.430633	0.936805	0.0415
1363	83.086	111.117	28.031	194.203	C2H4	-0.00488296	0.591492	0.977878	0.041543
1364	84.081	111.117	27.036	195.198	Unkwnown	-0.00169152	5.328	0.94062	0.0420405
1366	85.101	111.117	26.016	196.218	C2H2	-0.0138533	0.969534	0.970424	0.0425505
1367	86.096	111.117	25.021	197.213	Unkwnown	0.0146347	9.72669	0.943777	0.043048
1372	95.086	111.117	16.031	206.203	Unkwnown	0.00628361	0.359634	0.926104	0.047543
1373	96.057	111.117	15.06	207.174	Unkwnown	-0.0101612	4.47189	0.927887	0.0480285
1375	97.101	111.117	14.016	208.218	CH2	0.00148495	0.727262	0.997125	0.0485505
1377	99.092	111.117	12.025	210.209	C	-0.00972491	2.27706	0.921168	0.049546
1378	99.104	111.117	12.013	210.221	C	-0.00964939	2.14489	0.945947	0.049552
1379	99.117	111.117	12	210.234	C	-0.00456185	2.24461	0.946213	0.0495585
1380	109.065	111.117	2.052	220.182	Isotope-2	0.00389438	1.01015	0.947075	0.0545325
1381	109.076	111.117	2.041	220.193	Isotope-2	0.00306891	0.584116	0.969303	0.054538
1382	109.089	111.117	2.028	220.206	Isotope-2	0.0040207	0.477077	0.974515	0.0545445
1383	109.101	111.117	2.016	220.218	Isotope-2	0.00626311	0.460629	0.972265	0.0545505
1385	110.073	111.117	1.044	221.19	Isotope-1	0.00455984	6.25233	0.942723	0.0550365
1386	110.084	111.117	1.033	221.201	Isotope-1	0.00230718	4.40924	0.958607	0.055042
1387	110.109	111.117	1.008	221.226	Isotope-1	0.00956149	3.8291	0.95372	0.0550545
1389	111.104	111.117	0.013	222.221	Resolution	-0.00112191	0.906194	0.981122	0.055552
1395	111.08	112.007	0.927	223.087	Isotope-1	-0.00272194	0.0505289	0.979727	0.05554
1398	111.08	112.052	0.972	223.132	Isotope-1	-0.0018156	0.172708	0.979054	0.05554
1400	112.007	112.052	0.045	224.059	Resolution	0.00816527	3.27734	0.97022	0.0560035
1408	77.06	112.088	35.028	189.148	Unkwnown	-0.00119532	0.550943	0.931927	0.03853
1432	111.08	112.088	1.008	223.168	Isotope-1	0.0042646	0.0629192	0.949358	0.05554
1433	111.092	112.088	0.996	223.18	Isotope-1	0.000384859	0.1106	0.986238	0.055546
1435	112.007	112.088	0.081	224.095	Resolution	0.0079234	1.18926	0.915912	0.0560035
1438	41.039	112.112	71.073	153.151	Unkwnown	-0.00236391	0.0170075	0.910002	0.0205195
1441	57.07	112.112	55.042	169.182	Unkwnown	-0.00218841	0.0374487	0.961493	0.028535
1442	68.049	112.112	44.063	180.161	Unkwnown	-0.00214756	0.766323	0.958997	0.0340245
1443	69.07	112.112	43.042	181.182	Unkwnown	-0.00132657	0.0599467	0.963956	0.034535
1444	71.086	112.112	41.026	183.198	Unkwnown	-0.00295218	0.0835936	0.965312	0.035543
1447	83	112.112	29.112	195.112	Unkwnown	-0.00383441	0.0583871	0.936006	0.0415
1448	83.086	112.112	29.026	195.198	Unkwnown	-0.00149135	0.0795111	0.969201	0.041543
1449	84.081	112.112	28.031	196.193	C2H4	-0.00135465	0.73182	0.952358	0.0420405
1451	85.101	112.112	27.011	197.213	Unkwnown	-0.00263238	0.129768	0.959773	0.0425505
1452	86.096	112.112	26.016	198.208	C2H2	0.000820286	1.34387	0.9624	0.043048
1457	95.086	112.112	17.026	207.198	Unkwnown	-4.15905e-05	0.0485446	0.922007	0.047543
1458	96.057	112.112	16.055	208.169	Unkwnown	-0.00265692	0.619969	0.947955	0.0480285
1460	97.101	112.112	15.011	209.213	Unkwnown	-0.000545496	0.0970855	0.982087	0.0485505
1462	99.092	112.112	13.02	211.204	Unkwnown	-0.0023851	0.311221	0.92901	0.049546
1463	99.104	112.112	13.008	211.216	Unkwnown	-0.002154	0.288762	0.940513	0.049552
1464	99.117	112.112	12.995	211.229	Unkwnown	-0.00135866	0.299774	0.933788	0.0495585
1465	109.065	112.112	3.047	221.177	Isotope-3	-0.000527035	0.1381	0.953572	0.0545325
1466	109.076	112.112	3.036	221.188	Isotope-3	-0.000545768	0.0792777	0.96901	0.054538
1467	109.089	112.112	3.023	221.201	Isotope-3	-0.000380288	0.064566	0.971739	0.0545445
1468	109.101	112.112	3.011	221.213	Isotope-3	-5.1023e-05	0.0622106	0.967786	0.0545505
1469	110.06	112.112	2.052	222.172	Isotope-2	0.00274839	1.46993	0.904908	0.05503
1470	110.073	112.112	2.039	222.185	Isotope-2	-0.000540298	0.861742	0.95747	0.0550365
1471	110.084	112.112	2.028	222.196	Isotope-2	-0.000743043	0.602754	0.965811	0.055042
1472	110.109	112.112	2.003	222.221	Isotope-2	0.000316428	0.520517	0.955764	0.0550545
1474	111.104	112.112	1.008	223.216	Isotope-1	-0.00117566	0.123549	0.98576	0.055552
1475	111.117	112.112	0.995	223.229	Isotope-1	-0.000767653	0.133738	0.986713	0.0555585
1481	111.08	113.015	1.935	224.095	Isotope-2	-0.0116478	0.793481	0.985696	0.05554
1483	112.007	113.015	1.008	225.022	Isotope-1	0.0342419	15.0502	0.971648	0.0560035
1484	112.052	113.015	0.963	225.067	Isotope-1	-0.00296256	4.58	0.992789	0.056026
1485	112.088	113.015	0.927	225.103	Isotope-1	-0.0400593	10.7525	0.904044	0.056044
1490	111.08	113.06	1.98	224.14	Isotope-2	0.00113652	0.461502	0.987528	0.05554
1492	112.007	113.06	1.053	225.067	Isotope-1	0.0278068	8.75759	0.970883	0.0560035
1493	112.052	113.06	1.008	225.112	Isotope-1	0.0065275	2.64963	0.990104	0.056026
1494	112.088	113.06	0.972	225.148	Isotope-1	-0.0171711	6.38447	0.920932	0.056044
1495	113.015	113.06	0.045	226.075	Resolution	0.00827672	0.57819	0.99584	0.0565075
1500	41.039	113.096	72.057	154.135	Unkwnown	0.00096665	0.0304144	0.905404	0.0205195
1509	69.07	113.096	44.026	182.166	Unkwnown	0.00451952	0.099762	0.901723	0.034535
1513	83	113.096	30.096	196.096	Unkwnown	-0.000742148	0.101092	0.909826	0.0415
1516	84.081	113.096	29.015	197.177	Unkwnown	0.00392021	1.24738	0.915632	0.0420405
1517	85.065	113.096	28.031	198.161	C2H4	-0.00323025	0.643985	0.96591	0.0425325
1527	97.065	113.096	16.031	210.161	Unkwnown	0.00226694	0.392035	0.912886	0.0485325
1529	99.08	113.096	14.016	212.176	CH2	-0.000136033	0.752142	0.975122	0.04954
1530	99.092	113.096	14.004	212.188	CH2	-0.000355968	0.583686	0.976887	0.049546
1531	99.104	113.096	13.992	212.2	CH2	0.0013106	0.517018	0.943124	0.049552
1544	111.092	113.096	2.004	224.188	Isotope-2	0.00755827	0.164463	0.901478	0.055546
1545	111.104	113.096	1.992	224.2	Isotope-2	0.00508153	0.202768	0.910572	0.055552
1552	57.07	113.107	56.037	170.177	Unkwnown	0.00324027	0.0772041	0.917186	0.028535
1554	69.07	113.107	44.037	182.177	Unkwnown	0.00537637	0.122011	0.911844	0.034535
1555	71.086	113.107	42.021	184.193	Unkwnown	0.00143828	0.173578	0.926741	0.035543
1557	83	113.107	30.107	196.107	Unkwnown	-0.000876116	0.122978	0.915285	0.0415
1558	83.086	113.107	30.021	196.193	Unkwnown	0.00503121	0.161887	0.918248	0.041543
1559	84.081	113.107	29.026	197.188	Unkwnown	0.00493678	1.50991	0.915791	0.0420405
1560	85.065	113.107	28.042	198.172	C2H4	-0.00176103	0.738207	0.914158	0.0425325
1561	85.101	113.107	28.006	198.208	C2H4	0.00166517	0.273243	0.933708	0.0425505
1562	86.096	113.107	27.011	199.203	Unkwnown	0.00990733	2.71639	0.905152	0.043048
1566	97.101	113.107	16.006	210.208	Unkwnown	0.00753377	0.193328	0.910526	0.0485505
1567	99.08	113.107	14.027	212.187	CH2	0.00164492	0.866057	0.927036	0.04954
1568	99.092	113.107	14.015	212.199	CH2	-0.000657592	0.715362	0.986816	0.049546
1569	99.104	113.107	14.003	212.211	CH2	0.00016174	0.658004	0.988202	0.049552
1570	99.117	113.107	13.99	212.224	CH2	0.0024444	0.672812	0.965217	0.0495585
1581	111.104	113.107	2.003	224.211	Isotope-2	0.00603805	0.248224	0.921741	0.055552
1582	111.117	113.107	1.99	224.224	Isotope-2	0.00733983	0.263783	0.906696	0.0555585
1584	112.112	113.107	0.995	225.219	Isotope-1	0.00912499	1.95043	0.909825	0.056056
1585	113.096	113.107	0.011	226.203	Resolution	0.00110207	1.17709	0.970566	0.056548
1586	114.091	114.128	0.037	228.219	Resolution	0.0018711	0.339772	0.92813	0.0570455
1592	45.033	115.075	70.042	160.108	Unkwnown	0.00178422	0.0132931	0.909999	0.0225165
1594	57.033	115.075	58.042	172.108	Unkwnown	0.00277566	0.169142	0.909533	0.0285165
1600	83.049	115.075	32.026	198.124	Unkwnown	0.00113614	0.216622	0.900676	0.0415245
1603	87.044	115.075	28.031	202.119	C2H4	0.000548469	0.340137	0.973489	0.043522
1604	87.08	115.075	27.995	202.155	C2H4	0.00436882	0.626145	0.924374	0.04354
1609	101.06	115.075	14.015	216.135	CH2	0.00182388	0.452383	0.976782	0.05053
1610	101.096	115.075	13.979	216.171	CH2	0.00290919	1.20767	0.92947	0.050548
1612	103.032	115.075	12.043	218.107	C	0.00250991	1.84105	0.900529	0.051516
1620	45.033	115.112	70.079	160.145	Unkwnown	0.00117821	0.00605892	0.907286	0.0225165
1629	83.01	115.112	32.102	198.122	Unkwnown	-0.000352847	0.849095	0.901973	0.041505
1631	85.065	115.112	30.047	200.177	Unkwnown	-0.00103456	0.199613	0.911217	0.0425325
1633	87.044	115.112	28.068	202.156	Unkwnown	0.00098485	0.147689	0.915856	0.043522
1634	87.08	115.112	28.032	202.192	C2H4	0.00222837	0.291409	0.931791	0.04354
1639	101.06	115.112	14.052	216.172	CH2	0.00151622	0.197066	0.921656	0.05053
1640	101.096	115.112	14.016	216.208	CH2	0.00145093	0.570076	0.950386	0.050548
1641	102.068	115.112	13.044	217.18	Unkwnown	0.00504039	1.26363	0.914956	0.051034
1642	103.032	115.112	12.08	218.144	Unkwnown	0.00135613	0.857691	0.90852	0.051516
1645	115.075	115.112	0.037	230.187	Resolution	0.000603442	0.442307	0.957975	0.0575375
1670	101.096	115.123	14.027	216.219	CH2	-0.000990394	0.407522	0.915138	0.050548
1671	102.068	115.123	13.055	217.191	Unkwnown	0.00145186	0.949509	0.925945	0.051034
1676	115.112	115.123	0.011	230.235	Resolution	-0.00187546	0.696794	0.938357	0.057556
1685	89.023	117.07	28.047	206.093	C2H4	-0.00130296	0.805625	0.904914	0.0445115
1689	103.042	117.07	14.028	220.112	CH2	-0.00126085	1.05836	0.927943	0.051521
1690	103.075	117.07	13.995	220.145	CH2	0.000273252	0.812353	0.949437	0.0515375
1696	89.023	117.078	28.055	206.101	C2H4	-0.00144318	0.838087	0.903138	0.0445115
1700	103.042	117.078	14.036	220.12	CH2	-0.00128991	1.09171	0.918324	0.051521
1701	103.075	117.078	14.003	220.153	CH2	0.000105157	0.851882	0.955058	0.0515375
1702	117.07	117.078	0.008	234.148	Resolution	-9.38102e-05	1.04084	0.998521	0.058535
1706	89.042	117.091	28.049	206.133	C2H4	0.000500842	0.260382	0.915963	0.044521
1710	103.075	117.091	14.016	220.166	CH2	-0.000528999	0.83136	0.958934	0.0515375
1711	117.07	117.091	0.021	234.161	Resolution	-0.000580188	1.003	0.990138	0.058535
1712	117.078	117.091	0.013	234.169	Resolution	-0.000533563	0.967429	0.995469	0.058539
1716	89.042	117.102	28.06	206.144	C2H4	-0.000637488	0.2447	0.92349	0.044521
1717	89.06	117.102	28.042	206.162	C2H4	0.000477054	0.207538	0.907741	0.04453
1720	103.075	117.102	14.027	220.177	CH2	-0.00146673	0.770988	0.954275	0.0515375
1721	117.07	117.102	0.032	234.172	Resolution	-0.00137126	0.917396	0.971911	0.058535
1722	117.078	117.102	0.024	234.18	Resolution	-0.00136985	0.88843	0.981058	0.058539
1723	117.091	117.102	0.011	234.193	Resolution	-0.00096375	0.926218	0.993946	0.0585455
1725	90.055	117.127	27.072	207.182	Unkwnown	0.000182579	1.4136	0.90984	0.0450275
1727	118.065	118.078	0.013	236.143	Resolution	-6.18085e-06	0.882854	0.9804	0.0590325
1728	118.065	118.081	0.016	236.146	Resolution	-9.54175e-06	0.80587	0.963864	0.0590325
1729	118.078	118.081	0.003	236.159	Resolution	-4.96517e-06	0.923152	0.994265	0.059039
1730	118.065	118.086	0.021	236.151	Resolution	-1.01431e-05	0.609883	0.92756	0.0590325
1731	118.078	118.086	0.008	236.164	Resolution	-8.04722e-06	0.711933	0.975009	0.059039
1732	118.081	118.086	0.005	236.167	Resolution	-4.82434e-06	0.777931	0.989196	0.0590405
1743	107.049	119.06	12.011	226.109	C	0.00707115	0.145365	0.920333	0.0535245
1746	108.081	119.06	10.979	227.141	Unkwnown	0.0058383	0.527848	0.904381	0.0540405
1747	108.093	119.06	10.967	227.153	Unkwnown	0.00803265	0.541005	0.90046	0.0540465
1754	107.049	119.086	12.037	226.135	C	0.00742958	0.164142	0.924745	0.0535245
1755	107.086	119.086	12	226.172	C	0.0108283	0.0632601	0.905917	0.053543
1757	108.081	119.086	11.005	227.167	Unkwnown	0.00593144	0.600992	0.916683	0.0540405
1758	108.093	119.086	10.993	227.179	Unkwnown	0.0083896	0.61837	0.916165	0.0540465
1759	119.06	119.086	0.026	238.146	Resolution	-0.00031476	1.11514	0.992823	0.05953
1766	107.049	120.081	13.032	227.13	Unkwnown	-0.00201297	0.0622862	0.912054	0.0535245
1769	108.081	120.081	12	228.162	C	-0.00273217	0.235109	0.932371	0.0540405
1770	108.093	120.081	11.988	228.174	C	-0.00171836	0.2388	0.919911	0.0540465
1772	119.086	120.081	0.995	239.167	Isotope-1	-0.00431461	0.351895	0.913583	0.059543
1778	53.026	121.052	68.026	174.078	Unkwnown	-0.00746839	0.535523	0.917465	0.026513
1782	79.054	121.052	41.998	200.106	Unkwnown	-0.000917469	0.139779	0.912634	0.039527
1793	107.049	121.052	14.003	228.101	CH2	0.00926295	0.260049	0.916662	0.0535245
1795	108.057	121.052	12.995	229.109	Unkwnown	0.000579698	1.41883	0.925991	0.0540285
1796	108.081	121.052	12.971	229.133	Unkwnown	0.00636058	0.9769	0.931435	0.0540405
1797	108.093	121.052	12.959	229.145	Unkwnown	0.0108684	0.974653	0.902334	0.0540465
1798	119.06	121.052	1.992	240.112	Isotope-2	-0.0011771	1.65985	0.92203	0.05953
1799	119.086	121.052	1.966	240.138	Isotope-2	-0.000175145	1.46005	0.911307	0.059543
1800	120.081	121.052	0.971	241.133	Isotope-1	0.0183593	3.87309	0.929938	0.0600405
1807	107.049	121.065	14.016	228.114	CH2	0.00568656	0.557228	0.942226	0.0535245
1808	107.086	121.065	13.979	228.151	CH2	0.0174937	0.212614	0.913286	0.053543
1810	108.081	121.065	12.984	229.146	Unkwnown	0.000340708	2.05242	0.941891	0.0540405
1811	108.093	121.065	12.972	229.158	Unkwnown	0.00890981	2.10138	0.935894	0.0540465
1812	119.06	121.065	2.005	240.125	Isotope-2	-0.0141057	3.40606	0.9107	0.05953
1813	119.086	121.065	1.979	240.151	Isotope-2	-0.0128446	3.03842	0.912601	0.059543
1814	120.081	121.065	0.984	241.146	Isotope-1	0.0251134	8.32744	0.960976	0.0600405
1815	121.052	121.065	0.013	242.117	Resolution	-0.0106961	2.01553	0.969062	0.060526
1821	107.049	121.089	14.04	228.138	CH2	-0.00177672	0.977221	0.938132	0.0535245
1822	107.086	121.089	14.003	228.175	CH2	0.0178107	0.381773	0.9299	0.053543
1824	108.081	121.089	13.008	229.17	Unkwnown	-0.0106031	3.57368	0.932628	0.0540405
1825	108.093	121.089	12.996	229.182	Unkwnown	0.00347955	3.70883	0.938952	0.0540465
1827	119.086	121.089	2.003	240.175	Isotope-2	-0.0337068	5.29826	0.904494	0.059543
1828	120.081	121.089	1.008	241.17	Isotope-1	0.0321844	14.6511	0.959962	0.0600405
1829	121.052	121.089	0.037	242.141	Resolution	-0.0273586	3.41906	0.93437	0.060526
1830	121.065	121.089	0.024	242.154	Resolution	-0.0115656	1.74956	0.991613	0.0605325
1834	107.049	121.101	14.052	228.15	CH2	-0.0053308	0.974071	0.933292	0.0535245
1835	107.086	121.101	14.015	228.187	CH2	0.0138848	0.383001	0.930763	0.053543
1837	108.081	121.101	13.02	229.182	Unkwnown	-0.0140274	3.55742	0.926829	0.0540405
1838	108.093	121.101	13.008	229.194	Unkwnown	-0.000279078	3.70804	0.937249	0.0540465
1841	120.081	121.101	1.02	241.182	Isotope-1	0.0285005	14.6128	0.955947	0.0600405
1842	121.052	121.101	0.049	242.153	Resolution	-0.0297097	3.3669	0.918386	0.060526
1843	121.065	121.101	0.036	242.166	Resolution	-0.0150326	1.74266	0.985702	0.0605325
1844	121.089	121.101	0.012	242.19	Resolution	-0.00383776	1.001	0.998848	0.0605445
1854	121.065	122.084	1.019	243.149	Isotope-1	0.0106995	0.185598	0.911655	0.0605325
1863	107.049	122.096	15.047	229.145	Unkwnown	0.00540092	0.109821	0.921529	0.0535245
1866	108.081	122.096	14.015	230.177	CH2	0.00427216	0.408019	0.927102	0.0540405
1867	108.093	122.096	14.003	230.189	CH2	0.00595793	0.41881	0.924391	0.0540465
1868	119.06	122.096	3.036	241.156	Isotope-3	0.0013172	0.681973	0.903097	0.05953
1869	119.086	122.096	3.01	241.182	Isotope-3	0.0015413	0.609875	0.907289	0.059543
1870	120.081	122.096	2.015	242.177	Isotope-2	0.00921246	1.64872	0.943904	0.0600405
1871	121.052	122.096	1.044	243.148	Isotope-1	0.00221471	0.395668	0.942507	0.060526
1872	121.065	122.096	1.031	243.161	Isotope-1	0.00430196	0.196593	0.977366	0.0605325
1873	121.089	122.096	1.007	243.185	Isotope-1	0.00570789	0.11075	0.973748	0.0605445
1874	121.101	122.096	0.995	243.197	Isotope-1	0.00617294	0.109986	0.96954	0.0605505
1875	122.084	122.096	0.012	244.18	Resolution	-0.00488485	0.945682	0.956689	0.061042
1880	57.07	123.092	66.022	180.162	Unkwnown	0.000872456	0.286383	0.945725	0.028535
1881	68.049	123.092	55.043	191.141	Unkwnown	0.00224989	5.80405	0.933157	0.0340245
1882	69.07	123.092	54.022	192.162	Unkwnown	0.00912221	0.451163	0.934513	0.034535
1883	71.086	123.092	52.006	194.178	Unkwnown	-0.00579031	0.643758	0.954121	0.035543
1886	83.086	123.092	40.006	206.178	Unkwnown	0.00917052	0.591005	0.928152	0.041543
1888	85.101	123.092	37.991	208.193	Unkwnown	-0.00307462	0.997159	0.946509	0.0425505
1889	86.096	123.092	36.996	209.188	Unkwnown	0.0250841	10.1368	0.93134	0.043048
1894	95.086	123.092	28.006	218.178	C2H4	0.00896882	0.403829	0.979045	0.047543
1895	96.057	123.092	27.035	219.149	Unkwnown	-0.00342349	4.77057	0.936511	0.0480285
1897	97.101	123.092	25.991	220.193	C2H2	0.014597	0.73371	0.954438	0.0485505
1900	99.117	123.092	23.975	222.209	Unkwnown	0.00869459	2.26018	0.904272	0.0495585
1901	109.065	123.092	14.027	232.157	CH2	0.0113769	1.07969	0.95726	0.0545325
1902	109.076	123.092	14.016	232.168	CH2	0.0107203	0.622945	0.977293	0.054538
1903	109.089	123.092	14.003	232.181	CH2	0.0113924	0.51053	0.985473	0.0545445
1904	109.101	123.092	13.991	232.193	CH2	0.0129187	0.497308	0.991182	0.0545505
1906	110.073	123.092	13.019	233.165	Unkwnown	0.0104461	6.79256	0.968213	0.0550365
1907	110.084	123.092	13.008	233.176	Unkwnown	0.00842817	4.77045	0.980412	0.055042
1908	110.109	123.092	12.983	233.201	Unkwnown	0.0149509	4.20013	0.988319	0.0550545
1910	111.104	123.092	11.988	234.196	C	0.011705	0.916621	0.941366	0.055552
1911	111.117	123.092	11.975	234.209	C	0.0124396	1.01559	0.962817	0.0555585
1912	112.112	123.092	10.98	235.204	Unkwnown	0.0197346	7.47518	0.959915	0.056056
1927	124.039	124.057	0.018	248.096	Resolution	1.18335e-05	1.10982	0.990123	0.0620195
1934	87.044	125.042	37.998	212.086	Unkwnown	0.00268312	0.193717	0.909165	0.043522
1941	115.075	125.042	9.967	240.117	Unkwnown	0.00254547	0.559646	0.917694	0.0575375
1947	69.033	125.06	56.027	194.093	Unkwnown	-0.00135619	0.457082	0.901482	0.0345165
1949	83.01	125.06	42.05	208.07	Unkwnown	0.00025028	1.56103	0.905194	0.041505
1950	83.049	125.06	42.011	208.109	Unkwnown	0.00209847	0.187066	0.919674	0.0415245
1953	87.044	125.06	38.016	212.104	Unkwnown	0.00259371	0.273821	0.927534	0.043522
1955	97.04	125.06	28.02	222.1	C2H4	-6.35701e-05	0.302471	0.900266	0.04852
1959	101.06	125.06	24	226.12	Unkwnown	0.00387796	0.356837	0.911816	0.05053
1964	115.075	125.06	9.985	240.135	Unkwnown	0.0023239	0.79532	0.940886	0.0575375
1970	125.042	125.06	0.018	250.102	Resolution	-0.000572224	1.36313	0.983455	0.062521
1976	69.033	125.071	56.038	194.104	Unkwnown	-0.00224621	0.576882	0.914688	0.0345165
1978	83.01	125.071	42.061	208.081	Unkwnown	-0.000298121	1.97786	0.921774	0.041505
1979	83.049	125.071	42.022	208.12	Unkwnown	0.00192897	0.238517	0.942771	0.0415245
1982	87.044	125.071	38.027	212.115	Unkwnown	0.00280145	0.344348	0.937495	0.043522
1983	87.08	125.071	37.991	212.151	Unkwnown	0.00647148	0.643193	0.903073	0.04354
1984	97.04	125.071	28.031	222.111	C2H4	-0.000689631	0.383124	0.916758	0.04852
1988	101.06	125.071	24.011	226.131	Unkwnown	0.00438885	0.449534	0.923157	0.05053
1993	115.075	125.071	9.996	240.146	Unkwnown	0.00250847	0.997547	0.948342	0.0575375
1994	115.112	125.071	9.959	240.183	Unkwnown	0.00280932	2.05805	0.903183	0.057556
2000	125.042	125.071	0.029	250.113	Resolution	-0.000602148	1.66779	0.966936	0.062521
2001	125.06	125.071	0.011	250.131	Resolution	-0.000143698	1.23824	0.995116	0.06253
2008	45.033	125.084	80.051	170.117	Unkwnown	0.00611592	0.0168405	0.918285	0.0225165
2011	57.033	125.084	68.051	182.117	Unkwnown	0.0072009	0.216221	0.912777	0.0285165
2015	69.033	125.084	56.051	194.117	Unkwnown	-0.00147021	0.714268	0.932907	0.0345165
2020	83	125.084	42.084	208.084	Unkwnown	0.000346735	0.0934513	0.921895	0.0415
2021	83.01	125.084	42.074	208.094	Unkwnown	0.00123148	2.42087	0.9287	0.041505
2022	83.049	125.084	42.035	208.133	Unkwnown	0.00370122	0.295296	0.962191	0.0415245
2025	85.065	125.084	40.019	210.149	Unkwnown	-0.00138758	0.583374	0.962973	0.0425325
2028	87.044	125.084	38.04	212.128	Unkwnown	0.00560351	0.409997	0.918991	0.043522
2029	87.08	125.084	38.004	212.164	Unkwnown	0.00963032	0.781945	0.903826	0.04354
2030	97.04	125.084	28.044	222.124	C2H4	0.000491656	0.473731	0.933959	0.04852
2031	97.065	125.084	28.019	222.149	C2H4	0.00207498	0.378914	0.968183	0.0485325
2033	99.08	125.084	26.004	224.164	C2H2	0.00230134	0.65705	0.938074	0.04954
2036	101.06	125.084	24.024	226.144	Unkwnown	0.00751452	0.534638	0.903728	0.05053
2037	101.096	125.084	23.988	226.18	Unkwnown	0.00748665	1.53441	0.924413	0.050548
2039	103.032	125.084	22.052	228.116	Unkwnown	0.00660343	2.38476	0.912291	0.051516
2040	103.042	125.084	22.042	228.126	Unkwnown	0.00438299	1.85785	0.907767	0.051521
2045	113.096	125.084	11.988	238.18	C	0.00397261	0.816672	0.900679	0.056548
2047	115.075	125.084	10.009	240.159	Unkwnown	0.00561166	1.16754	0.913323	0.0575375
2048	115.112	125.084	9.972	240.196	Unkwnown	0.00522993	2.49587	0.901413	0.057556
2055	125.06	125.084	0.024	250.144	Resolution	0.00311095	1.41242	0.934077	0.06253
2056	125.071	125.084	0.013	250.155	Resolution	0.00276916	1.16577	0.959541	0.0625355
2059	41.039	125.096	84.057	166.135	Unkwnown	0.0012885	0.0459257	0.939038	0.0205195
2064	57.07	125.096	68.026	182.166	Unkwnown	0.00342825	0.0968334	0.952839	0.028535
2065	68.049	125.096	57.047	193.145	Unkwnown	0.00476352	1.91654	0.92107	0.0340245
2067	69.07	125.096	56.026	194.166	Unkwnown	0.00513856	0.157279	0.969627	0.034535
2068	71.086	125.096	54.01	196.182	Unkwnown	0.00334975	0.205795	0.912803	0.035543
2071	83	125.096	42.096	208.096	Unkwnown	-0.00361132	0.161015	0.987336	0.0415
2074	83.086	125.096	42.01	208.182	Unkwnown	0.00449062	0.209847	0.980676	0.041543
2075	84.081	125.096	41.015	209.177	Unkwnown	0.00443393	1.95372	0.975614	0.0420405
2076	85.065	125.096	40.031	210.161	Unkwnown	-0.00225867	0.913532	0.934865	0.0425325
2077	85.101	125.096	39.995	210.197	Unkwnown	0.00411398	0.319669	0.907641	0.0425505
2085	97.065	125.096	28.031	222.161	C2H4	0.00202078	0.611266	0.96905	0.0485325
2086	97.101	125.096	27.995	222.197	C2H4	0.00825574	0.246679	0.958041	0.0485505
2087	99.08	125.096	26.016	224.176	C2H2	0.00251817	1.05633	0.934709	0.04954
2088	99.092	125.096	26.004	224.188	C2H2	0.000941356	0.84652	0.968441	0.049546
2089	99.104	125.096	25.992	224.2	C2H2	0.00274071	0.762127	0.951393	0.049552
2090	99.117	125.096	25.979	224.213	C2H2	0.00638245	0.757462	0.904689	0.0495585
2095	109.065	125.096	16.031	234.161	Unkwnown	0.00789439	0.355268	0.941838	0.0545325
2096	109.076	125.096	16.02	234.172	Unkwnown	0.00836647	0.200747	0.942659	0.054538
2097	109.089	125.096	16.007	234.185	Unkwnown	0.00932108	0.160779	0.930318	0.0545445
2098	109.101	125.096	15.995	234.197	Unkwnown	0.01073	0.151959	0.9097	0.0545505
2100	110.073	125.096	15.023	235.169	Unkwnown	0.00874368	2.15782	0.920854	0.0550365
2101	110.084	125.096	15.012	235.18	Unkwnown	0.00848348	1.49792	0.922035	0.055042
2104	111.104	125.096	13.992	236.2	CH2	0.00694575	0.31126	0.953701	0.055552
2105	111.117	125.096	13.979	236.213	CH2	0.008254	0.334073	0.946746	0.0555585
2107	112.112	125.096	12.984	237.208	Unkwnown	0.0106619	2.45826	0.944069	0.056056
2108	113.096	125.096	12	238.192	C	0.00377235	1.36546	0.932994	0.056548
2109	113.107	125.096	11.989	238.203	C	0.00346738	1.13073	0.94016	0.0565535
2111	125.084	125.096	0.012	250.18	Resolution	0.00175102	1.49598	0.927187	0.062542
2112	41.039	125.107	84.068	166.146	Unkwnown	0.000204579	0.0627761	0.922467	0.0205195
2114	57.07	125.107	68.037	182.177	Unkwnown	0.00155645	0.136413	0.962132	0.028535
2115	68.049	125.107	57.058	193.156	Unkwnown	0.00352177	2.69546	0.928381	0.0340245
2116	69.07	125.107	56.037	194.177	Unkwnown	0.00419066	0.22058	0.974789	0.034535
2117	71.086	125.107	54.021	196.193	Unkwnown	0.000320022	0.296061	0.940141	0.035543
2120	83	125.107	42.107	208.107	Unkwnown	-0.00728183	0.222938	0.980303	0.0415
2122	83.086	125.107	42.021	208.193	Unkwnown	0.0028947	0.29653	0.992967	0.041543
2123	84.081	125.107	41.026	209.188	Unkwnown	0.00352853	2.72264	0.974208	0.0420405
2125	85.101	125.107	40.006	210.208	Unkwnown	0.00112542	0.462429	0.940138	0.0425505
2126	86.096	125.107	39.011	211.203	Unkwnown	0.0147169	4.6388	0.913602	0.043048
2133	97.065	125.107	28.042	222.172	C2H4	0.0019707	0.823553	0.936264	0.0485325
2134	97.101	125.107	28.006	222.208	C2H4	0.0074462	0.354364	0.985636	0.0485505
2136	99.092	125.107	26.015	224.199	C2H2	-0.000841987	1.16919	0.958592	0.049546
2137	99.104	125.107	26.003	224.211	C2H2	0.000547648	1.07444	0.960951	0.049552
2138	99.117	125.107	25.99	224.224	C2H2	0.00474185	1.08841	0.931194	0.0495585
2140	109.065	125.107	16.042	234.172	Unkwnown	0.00830074	0.495628	0.942148	0.0545325
2141	109.076	125.107	16.031	234.183	Unkwnown	0.00834305	0.283847	0.95539	0.054538
2142	109.089	125.107	16.018	234.196	Unkwnown	0.00928236	0.229414	0.951107	0.0545445
2143	109.101	125.107	16.006	234.208	Unkwnown	0.010943	0.218584	0.937191	0.0545505
2145	110.073	125.107	15.034	235.18	Unkwnown	0.00917232	3.03127	0.927157	0.0550365
2146	110.084	125.107	15.023	235.191	Unkwnown	0.00837127	2.1243	0.937065	0.055042
2147	110.109	125.107	14.998	235.216	Unkwnown	0.012973	1.79694	0.908624	0.0550545
2149	111.104	125.107	14.003	236.211	CH2	0.00615313	0.441759	0.969965	0.055552
2150	111.117	125.107	13.99	236.224	CH2	0.00726878	0.481691	0.977626	0.0555585
2152	112.112	125.107	12.995	237.219	Unkwnown	0.0110565	3.51894	0.96823	0.056056
2153	113.096	125.107	12.011	238.203	C	0.00395963	1.85327	0.907646	0.056548
2154	113.107	125.107	12	238.214	C	0.00228228	1.57271	0.93704	0.0565535
2155	123.092	125.107	2.015	248.199	Isotope-2	0.00656653	0.427919	0.920713	0.061546
2157	125.096	125.107	0.011	250.203	Resolution	-0.00217658	1.38202	0.990448	0.062548
2158	41.039	125.12	84.081	166.159	Unkwnown	-0.000561494	0.0692674	0.908756	0.0205195
2160	57.07	125.12	68.05	182.19	Unkwnown	-0.000108525	0.153194	0.963051	0.028535
2161	68.049	125.12	57.071	193.169	Unkwnown	0.00199415	3.03255	0.93089	0.0340245
2162	69.07	125.12	56.05	194.19	Unkwnown	0.00311595	0.246548	0.971369	0.034535
2163	71.086	125.12	54.034	196.206	Unkwnown	-0.00253283	0.338137	0.956092	0.035543
2165	83	125.12	42.12	208.12	Unkwnown	-0.0088839	0.246213	0.965795	0.0415
2166	83.086	125.12	42.034	208.206	Unkwnown	0.00155829	0.332065	0.991219	0.041543
2167	84.081	125.12	41.039	209.201	Unkwnown	0.00276484	3.02239	0.963965	0.0420405
2169	85.101	125.12	40.019	210.221	Unkwnown	-0.00173944	0.529246	0.958236	0.0425505
2170	86.096	125.12	39.024	211.216	Unkwnown	0.0138658	5.30324	0.930593	0.043048
2176	96.057	125.12	29.063	221.177	Unkwnown	0.00119997	2.40293	0.901365	0.0480285
2177	97.065	125.12	28.055	222.185	C2H4	0.00229845	0.894432	0.906949	0.0485325
2178	97.101	125.12	28.019	222.221	C2H4	0.00602349	0.401585	0.995181	0.0485505
2180	99.092	125.12	26.028	224.212	C2H2	-0.0019926	1.29593	0.947078	0.049546
2181	99.104	125.12	26.016	224.224	C2H2	-0.00121275	1.20604	0.961231	0.049552
2182	99.117	125.12	26.003	224.237	C2H2	0.00270796	1.23894	0.944349	0.0495585
2183	109.065	125.12	16.055	234.185	Unkwnown	0.00766763	0.554428	0.939523	0.0545325
2184	109.076	125.12	16.044	234.196	Unkwnown	0.00733716	0.319844	0.959452	0.054538
2185	109.089	125.12	16.031	234.209	Unkwnown	0.00809899	0.260012	0.960397	0.0545445
2186	109.101	125.12	16.019	234.221	Unkwnown	0.00968107	0.249242	0.951758	0.0545505
2188	110.073	125.12	15.047	235.193	Unkwnown	0.00833185	3.41167	0.929995	0.0550365
2189	110.084	125.12	15.036	235.204	Unkwnown	0.00717899	2.40244	0.944384	0.055042
2190	110.109	125.12	15.011	235.229	Unkwnown	0.0118101	2.05701	0.926697	0.0550545
2192	111.104	125.12	14.016	236.224	CH2	0.00480453	0.498376	0.97524	0.055552
2193	111.117	125.12	14.003	236.237	CH2	0.00562842	0.547857	0.990579	0.0555585
2194	112.112	125.12	13.008	237.232	Unkwnown	0.0100516	3.99298	0.979011	0.056056
2196	113.107	125.12	12.013	238.227	C	0.00118026	1.75191	0.930328	0.0565535
2197	123.092	125.12	2.028	248.212	Isotope-2	0.00453398	0.489337	0.937754	0.061546
2199	125.096	125.12	0.024	250.216	Resolution	-0.0032775	1.52708	0.975602	0.062548
2200	125.107	125.12	0.013	250.227	Resolution	-0.00155749	1.11753	0.996029	0.0625535
2217	83	127.112	44.112	210.112	Unkwnown	0.000137418	0.0934324	0.923326	0.0415
2221	84.081	127.112	43.031	211.193	Unkwnown	0.00477959	1.13509	0.917608	0.0420405
2222	85.065	127.112	42.047	212.177	Unkwnown	-0.00141067	0.579333	0.957267	0.0425325
2228	97.065	127.112	30.047	224.177	Unkwnown	0.00318727	0.358121	0.917985	0.0485325
2230	99.08	127.112	28.032	226.192	C2H4	0.00182894	0.664123	0.948817	0.04954
2231	99.092	127.112	28.02	226.204	C2H4	0.00131974	0.522032	0.961801	0.049546
2232	99.104	127.112	28.008	226.216	C2H4	0.00268734	0.464853	0.93287	0.049552
2235	101.096	127.112	26.016	228.208	C2H2	0.00759912	1.50767	0.910784	0.050548
2249	113.096	127.112	14.016	240.208	CH2	0.00219696	0.873889	0.962667	0.056548
2250	113.107	127.112	14.005	240.219	CH2	0.00234745	0.713253	0.95345	0.0565535
2255	125.084	127.112	2.028	252.196	Isotope-2	0.00198185	0.916342	0.91912	0.062542
2256	125.096	127.112	2.016	252.208	Isotope-2	0.00244898	0.575006	0.930254	0.062548
2257	125.107	127.112	2.005	252.219	Isotope-2	0.0041713	0.401084	0.905494	0.0625535
2264	83	127.136	44.136	210.136	Unkwnown	0.00221147	0.116273	0.90397	0.0415
2265	83.086	127.136	44.05	210.222	Unkwnown	0.00792325	0.152333	0.903226	0.041543
2266	84.081	127.136	43.055	211.217	Unkwnown	0.00775021	1.42529	0.905232	0.0420405
2274	99.092	127.136	28.044	226.228	C2H4	0.00281363	0.668001	0.963905	0.049546
2275	99.104	127.136	28.032	226.24	C2H4	0.0033471	0.619051	0.971933	0.049552
2276	99.117	127.136	28.019	226.253	C2H4	0.00567122	0.629122	0.943345	0.0495585
2288	113.096	127.136	14.04	240.232	CH2	0.00478471	1.08714	0.938069	0.056548
2289	113.107	127.136	14.029	240.243	CH2	0.00341905	0.934054	0.97655	0.0565535
2291	125.096	127.136	2.04	252.232	Isotope-2	0.00496377	0.718601	0.913211	0.062548
2292	125.107	127.136	2.029	252.243	Isotope-2	0.00629265	0.51635	0.91549	0.0625535
2293	125.12	127.136	2.016	252.256	Isotope-2	0.00735077	0.456345	0.907929	0.06256
2294	127.112	127.136	0.024	254.248	Resolution	0.00216025	1.23986	0.970426	0.063556
2296	116.143	127.903	11.76	244.046	Unkwnown	2.03384e-21	0.700308	1	0.0580715
2303	71.086	128.12	57.034	199.206	Unkwnown	-0.00312752	0.0276106	0.913677	0.035543
2309	85.101	128.12	43.019	213.221	Unkwnown	-0.00305194	0.0431219	0.913716	0.0425505
2310	86.096	128.12	42.024	214.216	Unkwnown	-0.00197158	0.454371	0.935163	0.043048
2319	99.092	128.12	29.028	227.212	Unkwnown	-0.00314361	0.10709	0.915701	0.049546
2320	99.104	128.12	29.016	227.224	Unkwnown	-0.0030615	0.0993103	0.925772	0.049552
2321	99.117	128.12	29.003	227.237	Unkwnown	-0.00278889	0.103118	0.919209	0.0495585
2331	111.104	128.12	17.016	239.224	Unkwnown	-0.00245975	0.0400679	0.917879	0.055552
2332	111.117	128.12	17.003	239.237	Unkwnown	-0.00225407	0.0426246	0.903462	0.0555585
2334	112.112	128.12	16.008	240.232	Unkwnown	-0.00203772	0.321009	0.922775	0.056056
2336	113.107	128.12	15.013	241.227	Unkwnown	-0.0029691	0.14741	0.915589	0.0565535
2341	125.12	128.12	3	253.24	Isotope-3	-0.00264694	0.077044	0.90314	0.06256
2343	127.136	128.12	0.984	255.256	Isotope-1	-0.00330878	0.152014	0.904763	0.063568
2348	71.086	128.143	57.057	199.229	Unkwnown	-0.0033429	0.0260817	0.909517	0.035543
2352	85.101	128.143	43.042	213.244	Unkwnown	-0.00333216	0.0412594	0.921985	0.0425505
2353	86.096	128.143	42.047	214.239	Unkwnown	-0.0021492	0.417352	0.908437	0.043048
2359	99.104	128.143	29.039	227.247	Unkwnown	-0.0032409	0.0930223	0.915465	0.049552
2360	99.117	128.143	29.026	227.26	Unkwnown	-0.00310642	0.0992312	0.933587	0.0495585
2379	127.136	128.143	1.007	255.279	Isotope-1	-0.00350678	0.143384	0.900823	0.063568
2380	128.12	128.143	0.023	256.263	Resolution	-0.000310555	0.90416	0.956363	0.06406
2388	80.049	129.045	48.996	209.094	Unkwnown	0.00431815	0.467384	0.90879	0.0400245
2414	125.06	129.045	3.985	254.105	Isotope-4	0.00138495	0.742208	0.915115	0.06253
2415	125.071	129.045	3.974	254.116	Isotope-4	0.0015055	0.597695	0.916918	0.0625355
2427	80.049	129.07	49.021	209.119	Unkwnown	0.00418632	0.67201	0.915769	0.0400245
2432	87.08	129.07	41.99	216.15	Unkwnown	0.00440989	0.613597	0.92518	0.04354
2445	115.075	129.07	13.995	244.145	CH2	0.00166417	0.893111	0.912491	0.0575375
2455	125.06	129.07	4.01	254.13	Isotope-4	-0.000236003	1.07966	0.932667	0.06253
2456	125.071	129.07	3.999	254.141	Isotope-4	-0.00013473	0.873122	0.938482	0.0625355
2458	129.045	129.07	0.025	258.115	Resolution	-0.0017479	1.41755	0.993236	0.0645225
2470	80.049	129.091	49.042	209.14	Unkwnown	0.00260892	0.637887	0.923734	0.0400245
2475	87.08	129.091	42.011	216.171	Unkwnown	0.00277382	0.584667	0.936731	0.04354
2494	121.052	129.091	8.039	250.143	Unkwnown	0.00274411	0.457471	0.900869	0.060526
2501	125.06	129.091	4.031	254.151	Isotope-4	-0.00119512	1.00081	0.918717	0.06253
2502	125.071	129.091	4.02	254.162	Isotope-4	-0.00115476	0.812012	0.92748	0.0625355
2504	129.045	129.091	0.046	258.136	Resolution	-0.00264443	1.31755	0.981103	0.0645225
2505	129.07	129.091	0.021	258.161	Resolution	-0.0011039	0.934274	0.992904	0.064535
2517	87.08	129.127	42.047	216.207	Unkwnown	-0.0020609	0.322084	0.903603	0.04354
2529	129.091	129.127	0.036	258.218	Resolution	-0.00307779	0.517265	0.906039	0.0645455
2532	129.127	129.139	0.012	258.266	Resolution	-0.00113404	0.710372	0.953786	0.0645635
2533	129.139	129.151	0.012	258.29	Resolution	-0.000538291	0.563324	0.907766	0.0645695
2563	101.096	131.06	29.964	232.156	Unkwnown	-0.0012634	0.576601	0.906052	0.050548
2564	102.068	131.06	28.992	233.128	Unkwnown	0.00222005	1.33304	0.909361	0.051034
2565	103.032	131.06	28.028	234.092	C2H4	-0.00166035	0.904045	0.902491	0.051516
2607	85.065	131.107	46.042	216.172	Unkwnown	-0.00353485	0.187854	0.906725	0.0425325
2618	103.032	131.107	28.075	234.139	C2H4	-0.00134394	0.814319	0.911506	0.051516
2619	103.042	131.107	28.065	234.149	C2H4	-0.00209865	0.634098	0.90651	0.051521
2636	125.084	131.107	6.023	256.191	Unkwnown	-0.00274012	0.308762	0.902823	0.062542
2643	131.06	131.107	0.047	262.167	Resolution	0.000602578	0.822856	0.923247	0.06553
2660	119.06	133.065	14.005	252.125	CH2	-7.64548e-05	0.601157	0.951733	0.05953
2661	119.086	133.065	13.979	252.151	CH2	0.000257302	0.530348	0.943377	0.059543
2682	119.06	133.101	14.041	252.161	CH2	-2.54972e-05	0.732858	0.94015	0.05953
2683	119.086	133.101	14.015	252.187	CH2	9.66272e-05	0.661703	0.953503	0.059543
2689	133.065	133.101	0.036	266.166	Resolution	0.000254788	1.20076	0.973187	0.0665325
2692	135.08	135.117	0.037	270.197	Resolution	-0.0111467	1.70098	0.99698	0.06754
2700	69.033	137.047	68.014	206.08	Unkwnown	-0.00187696	0.293007	0.927663	0.0345165
2705	83.01	137.047	54.037	220.057	Unkwnown	-0.000716871	0.988077	0.919401	0.041505
2706	83.049	137.047	53.998	220.096	Unkwnown	0.000420423	0.118832	0.938016	0.0415245
2728	121.052	137.047	15.995	258.099	Unkwnown	0.0023751	0.261461	0.901232	0.060526
2734	125.042	137.047	12.005	262.089	C	-0.000229704	0.781807	0.905152	0.062521
2735	125.06	137.047	11.987	262.107	C	-0.000139328	0.58805	0.943781	0.06253
2736	125.071	137.047	11.976	262.118	C	-0.000134409	0.47805	0.954722	0.0625355
2737	125.084	137.047	11.963	262.131	C	-0.000728569	0.389451	0.944325	0.062542
2740	129.045	137.047	8.002	266.092	Unkwnown	-1.18007e-05	0.701883	0.914481	0.0645225
2741	129.07	137.047	7.977	266.117	Unkwnown	0.000749731	0.501092	0.931733	0.064535
2742	129.091	137.047	7.956	266.138	Unkwnown	0.00140067	0.532471	0.931494	0.0645455
2746	133.065	137.047	3.982	270.112	Isotope-4	0.00187226	0.74642	0.901565	0.0665325
2753	69.033	137.06	68.027	206.093	Unkwnown	-0.00173885	0.362828	0.916002	0.0345165
2757	83.049	137.06	54.011	220.109	Unkwnown	0.00141983	0.143039	0.900891	0.0415245
2775	119.06	137.06	18	256.12	H2O	0.00222958	0.590895	0.901117	0.05953
2777	121.052	137.06	16.008	258.112	Unkwnown	0.00339595	0.328555	0.902842	0.060526
2784	125.06	137.06	12	262.12	C	0.000670216	0.712468	0.912081	0.06253
2785	125.071	137.06	11.989	262.131	C	0.000639361	0.581022	0.925573	0.0625355
2786	125.084	137.06	11.976	262.144	C	-5.66831e-05	0.472345	0.913636	0.062542
2788	129.07	137.06	7.99	266.13	Unkwnown	0.00162452	0.61415	0.910686	0.064535
2789	129.091	137.06	7.969	266.151	Unkwnown	0.00236417	0.656435	0.915738	0.0645455
2795	137.047	137.06	0.013	274.107	Resolution	0.000660427	1.23039	0.981274	0.0685235
2814	137.06	137.071	0.011	274.131	Resolution	0.000240109	1.35357	0.948364	0.06853
2815	81.07	137.132	56.062	218.202	Unkwnown	-0.0248128	0.368849	0.951754	0.040535
2817	135.08	137.132	2.052	272.212	Isotope-2	0.0318392	1.224	0.901466	0.06754
2818	135.117	137.132	2.015	272.249	Isotope-2	0.0399694	0.717905	0.905843	0.0675585
2821	41.039	139.148	98.109	180.187	Unkwnown	-0.000580975	0.0366377	0.94417	0.0205195
2824	57.07	139.148	82.078	196.218	Unkwnown	0.00068991	0.078373	0.97194	0.028535
2825	68.049	139.148	71.099	207.197	Unkwnown	0.0014345	1.56893	0.951374	0.0340245
2826	69.07	139.148	70.078	208.218	Unkwnown	0.00233093	0.12617	0.981241	0.034535
2827	71.086	139.148	68.062	210.234	Unkwnown	-0.000407477	0.172209	0.961542	0.035543
2831	83	139.148	56.148	222.148	Unkwnown	-0.00326603	0.124037	0.961622	0.0415
2832	83.086	139.148	56.062	222.234	Unkwnown	0.00231734	0.165433	0.976209	0.041543
2833	84.081	139.148	55.067	223.229	Unkwnown	0.00228507	1.53955	0.97042	0.0420405
2835	85.101	139.148	54.047	224.249	Unkwnown	0.000247002	0.267369	0.956145	0.0425505
2836	86.096	139.148	53.052	225.244	Unkwnown	0.00789488	2.7066	0.938748	0.043048
2841	95.086	139.148	44.062	234.234	Unkwnown	0.00570994	0.0995299	0.915224	0.047543
2842	96.057	139.148	43.091	235.205	Unkwnown	0.000734743	1.25513	0.929901	0.0480285
2843	97.065	139.148	42.083	236.213	Unkwnown	0.00202645	0.455938	0.913694	0.0485325
2844	97.101	139.148	42.047	236.249	Unkwnown	0.00475693	0.198449	0.972373	0.0485505
2845	99.08	139.148	40.068	238.228	Unkwnown	0.0015211	0.811945	0.907137	0.04954
2846	99.092	139.148	40.056	238.24	Unkwnown	-0.000497852	0.667716	0.963886	0.049546
2847	99.104	139.148	40.044	238.252	Unkwnown	0.000259901	0.614317	0.967103	0.049552
2848	99.117	139.148	40.031	238.265	Unkwnown	0.00235585	0.628911	0.946718	0.0495585
2850	109.065	139.148	30.083	248.213	Unkwnown	0.00435969	0.286949	0.959707	0.0545325
2851	109.076	139.148	30.072	248.224	Unkwnown	0.00454528	0.163346	0.967215	0.054538
2852	109.089	139.148	30.059	248.237	Unkwnown	0.00506788	0.132113	0.963389	0.0545445
2853	109.101	139.148	30.047	248.249	Unkwnown	0.00594734	0.126261	0.952009	0.0545505
2854	110.06	139.148	29.088	249.208	Unkwnown	0.0112886	3.03543	0.905228	0.05503
2855	110.073	139.148	29.075	249.221	Unkwnown	0.00461197	1.77185	0.953955	0.0550365
2856	110.084	139.148	29.064	249.232	Unkwnown	0.00426371	1.23618	0.959866	0.055042
2857	110.109	139.148	29.039	249.257	Unkwnown	0.00677665	1.05282	0.93691	0.0550545
2859	111.104	139.148	28.044	250.252	C2H4	0.00336265	0.253512	0.979548	0.055552
2860	111.117	139.148	28.031	250.265	C2H4	0.00441626	0.272214	0.972983	0.0555585
2862	112.112	139.148	27.036	251.26	Unkwnown	0.00626291	2.01241	0.975137	0.056056
2863	113.096	139.148	26.052	252.244	C2H2	0.00209833	1.06374	0.917358	0.056548
2864	113.107	139.148	26.041	252.255	C2H2	0.00127758	0.898425	0.942281	0.0565535
2865	123.092	139.148	16.056	262.24	Unkwnown	0.00316848	0.249418	0.943837	0.061546
2867	125.096	139.148	14.052	264.244	CH2	-0.000319358	0.766329	0.967812	0.062548
2868	125.107	139.148	14.041	264.255	CH2	0.00082876	0.555579	0.979014	0.0625535
2869	125.12	139.148	14.028	264.268	CH2	0.00168262	0.495809	0.980276	0.06256
2871	127.136	139.148	12.012	266.284	C	-0.000334909	0.913196	0.917948	0.063568
2872	128.12	139.148	11.028	267.268	Unkwnown	0.0206175	5.4493	0.918106	0.06406
2917	131.06	145.076	14.016	276.136	CH2	0.00359647	0.851033	0.909042	0.06553
2918	131.107	145.076	13.969	276.183	CH2	0.00300683	1.02799	0.95528	0.0655535
2919	133.065	145.076	12.011	278.141	C	0.00177824	0.660364	0.915854	0.0665325
2957	125.084	145.122	20.038	270.206	Unkwnown	3.65065e-06	-0.000102336	0.917124	0.062542
2964	131.107	145.122	14.015	276.229	CH2	4.53252e-06	-0.000665015	0.940152	0.0655535
2969	145.076	145.122	0.046	290.198	Resolution	4.2895e-06	-0.000390182	0.959998	0.072538
2970	145.962	145.968	0.006	291.93	Resolution	0.00785914	0.117277	0.998857	0.072981
2971	146.97	146.976	0.006	293.946	Resolution	8.75424e-05	0.0117835	0.998676	0.073485
2975	57.07	149.096	92.026	206.166	Unkwnown	0.00543726	0.0364433	0.918688	0.028535
2976	68.049	149.096	81.047	217.145	Unkwnown	0.00546393	0.74644	0.917469	0.0340245
2978	71.086	149.096	78.01	220.182	Unkwnown	0.00620818	0.0730787	0.940807	0.035543
2985	85.101	149.096	63.995	234.197	Unkwnown	0.00687969	0.110051	0.930506	0.0425505
2986	86.096	149.096	63	235.192	Unkwnown	0.00964885	1.1582	0.921388	0.043048
2991	95.086	149.096	54.01	244.182	Unkwnown	0.00704707	0.0491189	0.975117	0.047543
2992	96.057	149.096	53.039	245.153	Unkwnown	0.00486965	0.607937	0.933194	0.0480285
2993	97.101	149.096	51.995	246.197	Unkwnown	0.00824057	0.0854123	0.923172	0.0485505
2997	109.065	149.096	40.031	258.161	Unkwnown	0.00621096	0.143432	0.930559	0.0545325
2998	109.076	149.096	40.02	258.172	Unkwnown	0.00672551	0.0790564	0.949569	0.054538
2999	109.089	149.096	40.007	258.185	Unkwnown	0.00719201	0.062857	0.960233	0.0545445
3000	109.101	149.096	39.995	258.197	Unkwnown	0.00770392	0.0596042	0.971328	0.0545505
3002	110.073	149.096	39.023	259.169	Unkwnown	0.00645178	0.877996	0.944668	0.0550365
3003	110.084	149.096	39.012	259.18	Unkwnown	0.00659925	0.597828	0.956982	0.055042
3004	110.109	149.096	38.987	259.205	Unkwnown	0.00803395	0.499661	0.976292	0.0550545
3005	111.104	149.096	37.992	260.2	Unkwnown	0.00747132	0.110656	0.910406	0.055552
3006	111.117	149.096	37.979	260.213	Unkwnown	0.00810079	0.117091	0.937704	0.0555585
3007	112.112	149.096	36.984	261.208	Unkwnown	0.00883476	0.870512	0.934859	0.056056
3009	123.092	149.096	26.004	272.188	C2H2	0.00621717	0.119304	0.981884	0.061546
3012	125.12	149.096	23.976	274.216	Unkwnown	0.0070494	0.211173	0.900257	0.06256
3015	139.148	149.096	9.948	288.244	Unkwnown	0.0059901	0.436925	0.904098	0.069574
3040	41.039	152.12	111.081	193.159	Unkwnown	0.00152491	0.0140223	0.901315	0.0205195
3044	57.07	152.12	95.05	209.19	Unkwnown	0.00422786	0.0242872	0.911964	0.028535
3045	68.049	152.12	84.071	220.169	Unkwnown	0.00423708	0.497908	0.907013	0.0340245
3046	69.07	152.12	83.05	221.19	Unkwnown	0.00418141	0.0415312	0.903009	0.034535
3059	95.086	152.12	57.034	247.206	Unkwnown	0.00754035	0.0239624	0.912583	0.047543
3068	109.065	152.12	43.055	261.185	Unkwnown	0.00505045	0.092297	0.93346	0.0545325
3069	109.076	152.12	43.044	261.196	Unkwnown	0.00585023	0.0479913	0.929882	0.054538
3070	109.089	152.12	43.031	261.209	Unkwnown	0.00655301	0.0360298	0.924612	0.0545445
3071	109.101	152.12	43.019	261.221	Unkwnown	0.00735461	0.0316164	0.915582	0.0545505
3072	110.06	152.12	42.06	262.18	Unkwnown	0.00644177	1.10451	0.943298	0.05503
3073	110.073	152.12	42.047	262.193	Unkwnown	0.0056322	0.536456	0.942905	0.0550365
3074	110.084	152.12	42.036	262.204	Unkwnown	0.00605994	0.349732	0.934503	0.055042
3075	110.109	152.12	42.011	262.229	Unkwnown	0.00785378	0.251024	0.914181	0.0550545
3080	123.092	152.12	29.028	275.212	Unkwnown	0.00680915	0.0611138	0.913578	0.061546
3087	151.075	152.12	1.045	303.195	Isotope-1	0.00842239	1.08228	0.91039	0.0755375
3097	83.01	153.055	70.045	236.065	Unkwnown	0.000123219	1.5865	0.908973	0.041505
3098	83.049	153.055	70.006	236.104	Unkwnown	0.00179808	0.192783	0.93138	0.0415245
3103	87.08	153.055	65.975	240.135	Unkwnown	0.00514277	0.535237	0.901255	0.04354
3112	115.075	153.055	37.98	268.13	Unkwnown	0.00286994	0.772141	0.913226	0.0575375
3118	125.042	153.055	28.013	278.097	C2H4	0.000355849	1.29948	0.903722	0.062521
3119	125.06	153.055	27.995	278.115	C2H4	0.000244428	0.993396	0.950959	0.06253
3120	125.071	153.055	27.984	278.126	C2H4	0.00032984	0.803745	0.960416	0.0625355
3121	125.084	153.055	27.971	278.139	C2H4	0.000238085	0.62023	0.92747	0.062542
3122	129.045	153.055	24.01	282.1	Unkwnown	0.000400274	1.19009	0.92181	0.0645225
3123	129.07	153.055	23.985	282.125	Unkwnown	0.00177661	0.844762	0.935773	0.064535
3124	129.091	153.055	23.964	282.146	Unkwnown	0.00281032	0.90185	0.933162	0.0645455
3129	137.047	153.055	16.008	290.102	Unkwnown	0.0012731	1.60577	0.939353	0.0685235
3130	137.06	153.055	15.995	290.115	Unkwnown	0.000238995	1.31904	0.931337	0.06853
3154	125.06	153.07	28.01	278.13	C2H4	0.00524231	1.33896	0.919383	0.06253
3155	125.071	153.07	27.999	278.141	C2H4	0.00458741	1.12156	0.925512	0.0625355
3158	129.07	153.07	24	282.14	Unkwnown	0.00635992	1.19291	0.90548	0.064535
3159	129.091	153.07	23.979	282.161	Unkwnown	0.00727196	1.30955	0.909398	0.0645455
3161	137.047	153.07	16.023	290.117	Unkwnown	0.0026861	2.57954	0.925712	0.0685235
3162	137.06	153.07	16.01	290.13	Unkwnown	-0.00169337	2.33914	0.953253	0.06853
3164	153.055	153.07	0.015	306.125	Resolution	-6.19754e-05	1.64897	0.967412	0.0765275
3167	135.08	153.127	18.047	288.207	H2O	0.0134108	0.261209	0.91476	0.06754
3170	137.071	153.127	16.056	290.198	Unkwnown	-0.00303167	1.6599	0.931903	0.0685355
3175	135.08	153.151	18.071	288.231	H2O	1.00624e-06	-1.13687e-06	0.903173	0.06754
3178	137.071	153.151	16.08	290.222	Unkwnown	4.74638e-07	2.8362e-05	0.928113	0.0685355
3180	153.127	153.151	0.024	306.278	Resolution	9.03612e-07	2.06122e-06	0.985768	0.0765635
3182	116.143	153.98	37.837	270.123	Unkwnown	0.0183274	-3.33683	1	0.0580715
3183	127.903	153.98	26.077	281.883	C2H2	0.0183274	-4.7648	1	0.0639515
3208	155.086	155.107	0.021	310.193	Resolution	-0.00143699	1.03496	0.980376	0.077543
3220	99.092	155.142	56.05	254.234	Unkwnown	-0.00313426	0.147922	0.93059	0.049546
3221	99.104	155.142	56.038	254.246	Unkwnown	-0.00247855	0.126382	0.919907	0.049552
3224	113.096	155.142	42.046	268.238	Unkwnown	-0.0029184	0.248823	0.933314	0.056548
3225	113.107	155.142	42.035	268.249	Unkwnown	-0.00249057	0.191495	0.952076	0.0565535
3230	127.112	155.142	28.03	282.254	C2H4	-0.00374059	0.292282	0.941589	0.063556
3231	127.136	155.142	28.006	282.278	C2H4	-0.00329785	0.208102	0.95052	0.063568
3250	83.01	157.159	74.149	240.169	Unkwnown	-0.00257686	0.571039	0.92018	0.041505
3251	83.049	157.159	74.11	240.208	Unkwnown	-0.00177942	0.0668415	0.907016	0.0415245
3256	87.08	157.159	70.079	244.239	Unkwnown	-0.000244275	0.167916	0.921754	0.04354
3263	101.096	157.159	56.063	258.255	Unkwnown	-0.00143309	0.389058	0.944006	0.050548
3264	102.068	157.159	55.091	259.227	Unkwnown	0.00094633	0.888632	0.920366	0.051034
3272	115.112	157.159	42.047	272.271	Unkwnown	-0.0018778	0.617709	0.923606	0.057556
3273	115.123	157.159	42.036	272.282	Unkwnown	1.78828e-05	0.828145	0.904596	0.0575615
3279	125.084	157.159	32.075	282.243	Unkwnown	-0.00287723	0.236258	0.906327	0.062542
3329	133.065	161.132	28.067	294.197	C2H4	-0.000447492	0.0762675	0.900148	0.0665325
3345	98.975	163.063	64.088	262.038	Unkwnown	0.000208832	0.626346	0.9056	0.0494875
3353	125.042	163.063	38.021	288.105	Unkwnown	-6.78436e-05	0.742304	0.90742	0.062521
3354	125.06	163.063	38.003	288.123	Unkwnown	0.000312108	0.540386	0.903589	0.06253
3355	125.071	163.063	37.992	288.134	Unkwnown	0.000354527	0.437421	0.905729	0.0625355
3392	125.042	163.075	38.033	288.117	Unkwnown	0.0042492	0.834715	0.901486	0.062521
3393	125.06	163.075	38.015	288.135	Unkwnown	0.00408874	0.643527	0.909657	0.06253
3394	125.071	163.075	38.004	288.146	Unkwnown	0.003836	0.535962	0.916157	0.0625355
3403	137.047	163.075	26.028	300.122	C2H2	0.00402836	1.11675	0.912192	0.0685235
3410	163.063	163.075	0.012	326.138	Resolution	0.00366721	1.1963	0.99389	0.0815315
3424	83	163.099	80.099	246.099	Unkwnown	0.000775473	0.0635485	0.909212	0.0415
3428	84.081	163.099	79.018	247.18	Unkwnown	0.00373726	0.782481	0.9062	0.0420405
3429	85.065	163.099	78.034	248.164	Unkwnown	0.0013245	0.360227	0.923229	0.0425325
3433	97.065	163.099	66.034	260.164	Unkwnown	0.00327936	0.236847	0.912264	0.0485325
3435	99.08	163.099	64.019	262.179	Unkwnown	0.00308263	0.419978	0.91431	0.04954
3461	125.084	163.099	38.015	288.183	Unkwnown	0.00305397	0.584251	0.934632	0.062542
3462	125.096	163.099	38.003	288.195	Unkwnown	0.00232874	0.391555	0.914153	0.062548
3471	131.107	163.099	31.992	294.206	Unkwnown	0.00937337	1.68084	0.900888	0.0655535
3473	137.047	163.099	26.052	300.146	C2H2	0.00593824	1.31156	0.900521	0.0685235
3476	145.076	163.099	18.023	308.175	H2O	0.00552789	1.50943	0.905841	0.072538
3477	145.122	163.099	17.977	308.221	H2O	0.0184055	-12.8049	0.908421	0.072561
3484	163.075	163.099	0.024	326.174	Resolution	0.000180542	1.2446	0.919511	0.0815375
3485	41.039	163.123	122.084	204.162	Unkwnown	0.00130193	0.0193927	0.941222	0.0205195
3488	57.07	163.123	106.053	220.193	Unkwnown	0.00216149	0.0410023	0.947937	0.028535
3490	69.07	163.123	94.053	232.193	Unkwnown	0.00341585	0.0642734	0.937935	0.034535
3491	71.086	163.123	92.037	234.209	Unkwnown	0.0018247	0.0887979	0.912024	0.035543
3493	83	163.123	80.123	246.123	Unkwnown	0.000256693	0.0642977	0.949159	0.0415
3495	83.086	163.123	80.037	246.209	Unkwnown	0.00332108	0.0847794	0.941202	0.041543
3496	84.081	163.123	79.042	247.204	Unkwnown	0.00319295	0.794933	0.951883	0.0420405
3498	85.101	163.123	78.022	248.224	Unkwnown	0.00228284	0.136821	0.900488	0.0425505
3502	97.065	163.123	66.058	260.188	Unkwnown	0.00293106	0.23743	0.915479	0.0485325
3503	97.101	163.123	66.022	260.224	Unkwnown	0.00474751	0.100373	0.913161	0.0485505
3504	99.08	163.123	64.043	262.203	Unkwnown	0.00270731	0.421741	0.906063	0.04954
3505	99.092	163.123	64.031	262.215	Unkwnown	0.00191021	0.341512	0.93613	0.049546
3506	99.104	163.123	64.019	262.227	Unkwnown	0.002477	0.310633	0.920456	0.049552
3510	109.065	163.123	54.058	272.188	Unkwnown	0.00416406	0.149237	0.928816	0.0545325
3511	109.076	163.123	54.047	272.199	Unkwnown	0.00433906	0.0844707	0.927026	0.054538
3512	109.089	163.123	54.034	272.212	Unkwnown	0.00465164	0.0681044	0.916295	0.0545445
3515	110.073	163.123	53.05	273.196	Unkwnown	0.00435169	0.917735	0.914982	0.0550365
3516	110.084	163.123	53.039	273.207	Unkwnown	0.00423032	0.637567	0.91443	0.055042
3519	111.104	163.123	52.019	274.227	Unkwnown	0.0040299	0.128336	0.9229	0.055552
3520	111.117	163.123	52.006	274.24	Unkwnown	0.00457175	0.137717	0.909694	0.0555585
3522	112.112	163.123	51.011	275.235	Unkwnown	0.00538832	1.02764	0.922252	0.056056
3523	113.096	163.123	50.027	276.219	Unkwnown	0.00311627	0.548526	0.904499	0.056548
3524	113.107	163.123	50.016	276.23	Unkwnown	0.00296151	0.4552	0.904727	0.0565535
3527	125.096	163.123	38.027	288.219	Unkwnown	0.00176692	0.397667	0.954164	0.062548
3528	125.107	163.123	38.016	288.23	Unkwnown	0.00256533	0.284587	0.944803	0.0625535
3529	125.12	163.123	38.003	288.243	Unkwnown	0.00310539	0.252242	0.932827	0.06256
3535	139.148	163.123	23.975	302.271	Unkwnown	0.00235529	0.505344	0.945993	0.069574
3544	163.099	163.123	0.024	326.222	Resolution	-0.000585552	1.01492	0.961074	0.0815495
3546	41.039	163.136	122.097	204.175	Unkwnown	0.000747002	0.0191198	0.943769	0.0205195
3550	57.07	163.136	106.066	220.206	Unkwnown	0.00144953	0.0407987	0.96136	0.028535
3551	68.049	163.136	95.087	231.185	Unkwnown	0.00225591	0.794609	0.913665	0.0340245
3552	69.07	163.136	94.066	232.206	Unkwnown	0.00274546	0.0637448	0.9467	0.034535
3553	71.086	163.136	92.05	234.222	Unkwnown	0.000928809	0.0893707	0.93896	0.035543
3555	83	163.136	80.136	246.136	Unkwnown	-0.000199722	0.0630908	0.943095	0.0415
3556	83.086	163.136	80.05	246.222	Unkwnown	0.00267313	0.0839577	0.94686	0.041543
3557	84.081	163.136	79.055	247.217	Unkwnown	0.00263644	0.782413	0.948539	0.0420405
3559	85.101	163.136	78.035	248.237	Unkwnown	0.00138675	0.137731	0.92726	0.0425505
3560	86.096	163.136	77.04	249.232	Unkwnown	0.00524001	1.40434	0.916339	0.043048
3563	97.065	163.136	66.071	260.201	Unkwnown	0.00254657	0.23106	0.90053	0.0485325
3564	97.101	163.136	66.035	260.237	Unkwnown	0.00396256	0.100327	0.931077	0.0485505
3566	99.092	163.136	64.044	262.228	Unkwnown	0.00136483	0.336325	0.934805	0.049546
3567	99.104	163.136	64.032	262.24	Unkwnown	0.00180934	0.308178	0.92789	0.049552
3570	109.065	163.136	54.071	272.201	Unkwnown	0.00343452	0.148578	0.944143	0.0545325
3571	109.076	163.136	54.06	272.212	Unkwnown	0.00356644	0.0843577	0.945765	0.054538
3572	109.089	163.136	54.047	272.225	Unkwnown	0.00383406	0.0682391	0.938922	0.0545445
3573	109.101	163.136	54.035	272.237	Unkwnown	0.00425992	0.0653592	0.925802	0.0545505
3575	110.073	163.136	53.063	273.209	Unkwnown	0.00356602	0.917377	0.93508	0.0550365
3576	110.084	163.136	53.052	273.22	Unkwnown	0.00341822	0.638537	0.936812	0.055042
3577	110.109	163.136	53.027	273.245	Unkwnown	0.00470253	0.544414	0.907711	0.0550545
3579	111.104	163.136	52.032	274.24	Unkwnown	0.00327089	0.128044	0.93921	0.055552
3580	111.117	163.136	52.019	274.253	Unkwnown	0.00374505	0.138081	0.931791	0.0555585
3582	112.112	163.136	51.024	275.248	Unkwnown	0.00458554	1.02859	0.942508	0.056056
3584	113.107	163.136	50.029	276.243	Unkwnown	0.00237017	0.449188	0.906056	0.0565535
3585	123.092	163.136	40.044	286.228	Unkwnown	0.00270784	0.130125	0.923301	0.061546
3587	125.096	163.136	38.04	288.232	Unkwnown	0.00125351	0.3909	0.950576	0.062548
3588	125.107	163.136	38.029	288.243	Unkwnown	0.00193726	0.281599	0.949285	0.0625535
3589	125.12	163.136	38.016	288.256	Unkwnown	0.00239392	0.250902	0.944067	0.06256
3595	139.148	163.136	23.988	302.284	Unkwnown	0.00165497	0.502429	0.956965	0.069574
3601	163.099	163.136	0.037	326.235	Resolution	-0.00106817	0.998156	0.933144	0.0815495
3602	163.123	163.136	0.013	326.259	Resolution	-0.000593801	0.989093	0.995418	0.0815615
3604	41.039	163.148	122.109	204.187	Unkwnown	-0.000664476	0.00765245	0.939638	0.0205195
3608	57.07	163.148	106.078	220.218	Unkwnown	0.000332023	0.0144869	0.965172	0.028535
3609	68.049	163.148	95.099	231.197	Unkwnown	0.000253484	0.301435	0.920076	0.0340245
3610	69.07	163.148	94.078	232.218	Unkwnown	0.000585705	0.0235395	0.947529	0.034535
3611	71.086	163.148	92.062	234.234	Unkwnown	0.000820176	0.0280577	0.952922	0.035543
3613	83	163.148	80.148	246.148	Unkwnown	-0.000781497	0.0243066	0.934384	0.0415
3614	83.086	163.148	80.062	246.234	Unkwnown	0.000832093	0.0294351	0.946302	0.041543
3615	84.081	163.148	79.067	247.229	Unkwnown	0.000400145	0.296685	0.941959	0.0420405
3617	85.101	163.148	78.047	248.249	Unkwnown	0.00111568	0.0419264	0.941372	0.0425505
3618	86.096	163.148	77.052	249.244	Unkwnown	0.0019063	0.472047	0.930274	0.043048
3619	95.086	163.148	68.062	258.234	Unkwnown	0.00148225	0.0175269	0.916826	0.047543
3620	96.057	163.148	67.091	259.205	Unkwnown	0.000337408	0.232124	0.903228	0.0480285
3622	97.101	163.148	66.047	260.249	Unkwnown	0.00160418	0.0327652	0.938804	0.0485505
3624	99.092	163.148	64.056	262.24	Unkwnown	-5.08666e-05	0.126874	0.928908	0.049546
3625	99.104	163.148	64.044	262.252	Unkwnown	0.000586123	0.106913	0.928773	0.049552
3626	99.117	163.148	64.031	262.265	Unkwnown	0.00138236	0.10002	0.909005	0.0495585
3627	109.065	163.148	54.083	272.213	Unkwnown	0.000769133	0.0556278	0.94835	0.0545325
3628	109.076	163.148	54.072	272.224	Unkwnown	0.00109237	0.0299006	0.95284	0.054538
3629	109.089	163.148	54.059	272.237	Unkwnown	0.00136128	0.0233048	0.948937	0.0545445
3630	109.101	163.148	54.047	272.249	Unkwnown	0.00167241	0.0214902	0.939513	0.0545505
3632	110.073	163.148	53.075	273.221	Unkwnown	0.000885382	0.338989	0.942958	0.0550365
3633	110.084	163.148	53.064	273.232	Unkwnown	0.001053	0.225724	0.946485	0.055042
3634	110.109	163.148	53.039	273.257	Unkwnown	0.00182361	0.178759	0.924711	0.0550545
3636	111.104	163.148	52.044	274.252	Unkwnown	0.00109493	0.044405	0.945405	0.055552
3637	111.117	163.148	52.031	274.265	Unkwnown	0.00160177	0.0443955	0.942356	0.0555585
3639	112.112	163.148	51.036	275.26	Unkwnown	0.00169207	0.345278	0.951682	0.056056
3641	113.107	163.148	50.041	276.255	Unkwnown	0.000543384	0.162977	0.902119	0.0565535
3642	123.092	163.148	40.056	286.24	Unkwnown	0.00120439	0.0424078	0.939095	0.061546
3644	125.096	163.148	38.052	288.244	Unkwnown	-0.000129233	0.148348	0.942806	0.062548
3645	125.107	163.148	38.041	288.255	Unkwnown	0.000537917	0.0993907	0.94772	0.0625535
3646	125.12	163.148	38.028	288.268	Unkwnown	0.000946573	0.0843881	0.947379	0.06256
3652	139.148	163.148	24	302.296	Unkwnown	0.000404864	0.178407	0.959855	0.069574
3654	149.096	163.148	14.052	312.244	CH2	-0.000804032	0.345172	0.907421	0.074548
3656	163.099	163.148	0.049	326.247	Resolution	-0.000730968	0.363615	0.909832	0.0815495
3657	163.123	163.148	0.025	326.271	Resolution	-0.000347306	0.348653	0.987682	0.0815615
3658	163.136	163.148	0.012	326.284	Resolution	1.48323e-05	0.343659	0.997845	0.081568
3706	125.084	165.091	40.007	290.175	Unkwnown	2.77438e-06	-3.7788e-05	0.905538	0.062542
3717	137.047	165.091	28.044	302.138	C2H4	3.34437e-06	-0.000164496	0.916299	0.0685235
3718	137.06	165.091	28.031	302.151	C2H4	3.32608e-06	-0.000125061	0.921897	0.06853
3737	166.062	166.078	0.016	332.14	Resolution	0.0020074	6.10357	0.951948	0.083031
3743	71.086	166.135	95.049	237.221	Unkwnown	0.00912917	0.6389	0.931715	0.035543
3749	85.101	166.135	81.034	251.236	Unkwnown	0.0142153	0.96893	0.929707	0.0425505
3750	86.096	166.135	80.039	252.231	Unkwnown	0.037973	10.2698	0.925412	0.043048
3753	95.086	166.135	71.049	261.221	Unkwnown	0.0271435	0.387596	0.930341	0.047543
3754	96.057	166.135	70.078	262.192	Unkwnown	-0.00709489	5.50174	0.918911	0.0480285
3755	97.101	166.135	69.034	263.236	Unkwnown	0.0322287	0.7066	0.921143	0.0485505
3760	109.076	166.135	57.059	275.211	Unkwnown	0.0275538	0.605714	0.925173	0.054538
3761	109.089	166.135	57.046	275.224	Unkwnown	0.0283385	0.495744	0.941551	0.0545445
3762	109.101	166.135	57.034	275.236	Unkwnown	0.0291356	0.48634	0.954398	0.0545505
3764	110.073	166.135	56.062	276.208	Unkwnown	0.0253432	6.73461	0.916558	0.0550365
3765	110.084	166.135	56.051	276.219	Unkwnown	0.0246535	4.66941	0.93496	0.055042
3766	110.109	166.135	56.026	276.244	Unkwnown	0.0296284	4.17213	0.958921	0.0550545
3768	111.104	166.135	55.031	277.239	Unkwnown	0.019321	0.975201	0.915948	0.055552
3769	111.117	166.135	55.018	277.252	Unkwnown	0.0271398	1.00876	0.937937	0.0555585
3770	112.112	166.135	54.023	278.247	Unkwnown	0.0315817	7.65191	0.942346	0.056056
3772	123.092	166.135	43.043	289.227	Unkwnown	0.0159556	0.982819	0.95904	0.061546
3778	139.148	166.135	26.987	305.283	Unkwnown	0.0196877	3.41934	0.900087	0.069574
3779	149.096	166.135	17.039	315.231	Unkwnown	0.0141509	5.71535	0.954063	0.074548
3793	95.049	167.07	72.021	262.119	Unkwnown	-0.00118305	0.27846	0.902896	0.0475245
3811	95.049	167.086	72.037	262.135	Unkwnown	-0.000202202	0.000700709	0.907229	0.0475245
3821	167.07	167.086	0.016	334.156	Resolution	-0.00012692	0.00182526	0.999342	0.083535
3852	161.132	175.148	14.016	336.28	CH2	-2.08605e-07	0.0561931	0.912221	0.080566
3862	71.086	178.123	107.037	249.209	Unkwnown	0.00145423	0.0200701	0.926193	0.035543
3866	85.101	178.123	93.022	263.224	Unkwnown	0.00167175	0.0299373	0.927913	0.0425505
3867	86.096	178.123	92.027	264.219	Unkwnown	0.00208688	0.354474	0.928702	0.043048
3869	95.086	178.123	83.037	273.209	Unkwnown	0.00229113	0.0111143	0.910727	0.047543
3871	97.101	178.123	81.022	275.224	Unkwnown	0.00201622	0.0234286	0.920306	0.0485505
3876	109.076	178.123	69.047	287.199	Unkwnown	0.00173409	0.0208649	0.92341	0.054538
3877	109.089	178.123	69.034	287.212	Unkwnown	0.00195197	0.016109	0.935938	0.0545445
3878	109.101	178.123	69.022	287.224	Unkwnown	0.00221968	0.0145906	0.943672	0.0545505
3880	110.073	178.123	68.05	288.196	Unkwnown	0.00157834	0.237306	0.916486	0.0550365
3881	110.084	178.123	68.039	288.207	Unkwnown	0.00172951	0.156459	0.9331	0.055042
3882	110.109	178.123	68.014	288.232	Unkwnown	0.00236723	0.119426	0.945331	0.0550545
3884	111.104	178.123	67.019	289.227	Unkwnown	0.0015108	0.0330418	0.913401	0.055552
3885	111.117	178.123	67.006	289.24	Unkwnown	0.00203503	0.0315354	0.931319	0.0555585
3886	112.112	178.123	66.011	290.235	Unkwnown	0.00195701	0.256769	0.942075	0.056056
3888	123.092	178.123	55.031	301.215	Unkwnown	0.00191082	0.0287131	0.944308	0.061546
3891	125.12	178.123	53.003	303.243	Unkwnown	0.00141341	0.0625743	0.911987	0.06256
3892	128.12	178.123	50.003	306.243	Unkwnown	0.00365415	0.765016	0.90942	0.06406
3894	139.148	178.123	38.975	317.271	Unkwnown	0.00105572	0.130876	0.912539	0.069574
3895	149.096	178.123	29.027	327.219	Unkwnown	0.00062607	0.229872	0.92692	0.074548
3899	163.148	178.123	14.975	341.271	Unkwnown	0.000649533	0.751911	0.908614	0.081574
3900	166.135	178.123	11.988	344.258	C	0.00291021	0.0175932	0.967413	0.0830675
3956	85.065	179.107	94.042	264.172	Unkwnown	-0.000495507	0.341582	0.910205	0.0425325
3965	99.08	179.107	80.027	278.187	Unkwnown	0.000545872	0.415405	0.923388	0.04954
3986	113.096	179.107	66.011	292.203	Unkwnown	0.000597302	0.553165	0.911859	0.056548
3992	125.096	179.107	54.011	304.203	Unkwnown	-0.000962368	0.405878	0.90298	0.062548
4009	163.099	179.107	16.008	342.206	Unkwnown	-0.00227567	0.976742	0.928106	0.0815495
4010	163.123	179.107	15.984	342.23	Unkwnown	-0.00221798	0.990355	0.927491	0.0815615
4011	163.136	179.107	15.971	342.243	Unkwnown	-0.00186878	1.01547	0.918912	0.081568
4012	163.148	179.107	15.959	342.255	Unkwnown	0.00482787	1.82335	0.907976	0.081574
4015	179.086	179.107	0.021	358.193	Resolution	6.24691e-05	2.05854	0.920561	0.089543
4018	57.07	179.128	122.058	236.198	Unkwnown	1.33203e-06	-1.95685e-06	0.93308	0.028535
4019	68.049	179.128	111.079	247.177	Unkwnown	-5.10538e-07	5.72234e-05	0.935039	0.0340245
4020	69.07	179.128	110.058	248.198	Unkwnown	7.28936e-07	-6.86822e-07	0.926369	0.034535
4021	71.086	179.128	108.042	250.214	Unkwnown	1.10783e-06	-2.92551e-06	0.948916	0.035543
4026	83.086	179.128	96.042	262.214	Unkwnown	7.61638e-07	-1.08795e-06	0.922374	0.041543
4028	85.101	179.128	94.027	264.229	Unkwnown	1.16299e-06	-5.11614e-06	0.939477	0.0425505
4029	86.096	179.128	93.032	265.224	Unkwnown	3.38059e-07	2.72866e-05	0.931087	0.043048
4034	95.086	179.128	84.042	274.214	Unkwnown	1.40597e-06	-3.26563e-06	0.94311	0.047543
4035	96.057	179.128	83.071	275.185	Unkwnown	2.95319e-07	1.14373e-05	0.947301	0.0480285
4037	97.101	179.128	82.027	276.229	Unkwnown	8.82366e-07	-2.33459e-06	0.950645	0.0485505
4041	99.117	179.128	80.011	278.245	Unkwnown	9.20946e-07	-7.62454e-06	0.900385	0.0495585
4042	109.065	179.128	70.063	288.193	Unkwnown	1.33162e-06	-8.14276e-06	0.947508	0.0545325
4043	109.076	179.128	70.052	288.204	Unkwnown	1.26571e-06	-4.26253e-06	0.962696	0.054538
4044	109.089	179.128	70.039	288.217	Unkwnown	1.16938e-06	-3.02816e-06	0.968354	0.0545445
4045	109.101	179.128	70.027	288.229	Unkwnown	1.13806e-06	-2.83805e-06	0.972503	0.0545505
4047	110.073	179.128	69.055	289.201	Unkwnown	1.0331e-06	-3.08057e-05	0.955134	0.0550365
4048	110.084	179.128	69.044	289.212	Unkwnown	1.06887e-06	-2.28601e-05	0.962742	0.055042
4049	110.109	179.128	69.019	289.237	Unkwnown	9.51746e-07	-1.64135e-05	0.966726	0.0550545
4051	111.104	179.128	68.024	290.232	Unkwnown	1.01646e-06	-4.05723e-06	0.955463	0.055552
4052	111.117	179.128	68.011	290.245	Unkwnown	9.25685e-07	-3.60308e-06	0.961086	0.0555585
4054	112.112	179.128	67.016	291.24	Unkwnown	5.00819e-07	5.77984e-06	0.967286	0.056056
4057	123.092	179.128	56.036	302.22	Unkwnown	1.44899e-06	-7.82343e-06	0.978923	0.061546
4059	125.107	179.128	54.021	304.235	Unkwnown	1.07598e-06	-9.23939e-06	0.92202	0.0625535
4060	125.12	179.128	54.008	304.248	Unkwnown	9.55258e-07	-6.45132e-06	0.937376	0.06256
4063	139.148	179.128	39.98	318.276	Unkwnown	1.02705e-06	-1.46149e-05	0.936397	0.069574
4064	149.096	179.128	30.032	328.224	Unkwnown	1.79583e-06	-6.24688e-05	0.967924	0.074548
4067	163.136	179.128	15.992	342.264	Unkwnown	1.67652e-06	-6.38656e-05	0.915642	0.081568
4068	163.148	179.128	15.98	342.276	Unkwnown	1.21615e-06	-0.000108096	0.930562	0.081574
4069	166.135	179.128	12.993	345.263	Unkwnown	9.33295e-07	-2.86343e-06	0.959545	0.0830675
4072	178.123	179.128	1.005	357.251	Isotope-1	1.04647e-06	-9.24699e-05	0.946447	0.0890615
4076	180.081	180.093	0.012	360.174	Resolution	0.0029962	4.71524	0.969696	0.0900405
4079	68.049	180.151	112.102	248.2	Unkwnown	-3.97252e-06	0.000362604	0.903778	0.0340245
4081	71.086	180.151	109.065	251.237	Unkwnown	1.5009e-06	7.57906e-06	0.922577	0.035543
4087	85.101	180.151	95.05	265.252	Unkwnown	1.26332e-06	1.4074e-05	0.919122	0.0425505
4088	86.096	180.151	94.055	266.247	Unkwnown	3.89062e-07	0.000291265	0.924588	0.043048
4092	95.086	180.151	85.065	275.237	Unkwnown	2.44767e-06	1.72662e-06	0.918263	0.047543
4093	96.057	180.151	84.094	276.208	Unkwnown	-3.09857e-06	0.000247299	0.921939	0.0480285
4094	97.101	180.151	83.05	277.252	Unkwnown	7.86903e-07	1.58192e-05	0.922756	0.0485505
4099	109.076	180.151	71.075	289.227	Unkwnown	2.07616e-06	4.99297e-06	0.919829	0.054538
4100	109.089	180.151	71.062	289.24	Unkwnown	1.64078e-06	6.32701e-06	0.936825	0.0545445
4101	109.101	180.151	71.05	289.252	Unkwnown	1.41704e-06	7.38024e-06	0.95021	0.0545505
4103	110.073	180.151	70.078	290.224	Unkwnown	1.06267e-06	0.000122038	0.909375	0.0550365
4104	110.084	180.151	70.067	290.235	Unkwnown	9.54696e-07	8.90085e-05	0.926756	0.055042
4105	110.109	180.151	70.042	290.26	Unkwnown	8.1058e-07	8.9863e-05	0.951547	0.0550545
4107	111.104	180.151	69.047	291.255	Unkwnown	1.17211e-06	1.56753e-05	0.917448	0.055552
4108	111.117	180.151	69.034	291.268	Unkwnown	1.20645e-06	1.71458e-05	0.938836	0.0555585
4109	112.112	180.151	68.039	292.263	Unkwnown	-1.47577e-07	0.000245788	0.942873	0.056056
4110	123.092	180.151	57.059	303.243	Unkwnown	2.11734e-06	6.88094e-06	0.953818	0.061546
4117	149.096	180.151	31.055	329.247	Unkwnown	4.21456e-06	-6.76987e-05	0.952356	0.074548
4121	166.135	180.151	14.016	346.286	CH2	-6.89272e-07	2.83722e-05	0.988347	0.0830675
4124	178.123	180.151	2.028	358.274	Isotope-2	4.86781e-06	-0.000385927	0.953676	0.0890615
4125	179.128	180.151	1.023	359.279	Isotope-1	1.07468e-06	3.16982	0.961581	0.089564
4129	181.076	181.101	0.025	362.177	Resolution	0.0041451	0.260808	0.949105	0.090538
4134	41.039	181.159	140.12	222.198	Unkwnown	-2.66455e-05	0.0109831	0.922957	0.0205195
4139	57.07	181.159	124.089	238.229	Unkwnown	0.000600151	0.0228612	0.90106	0.028535
4142	69.07	181.159	112.089	250.229	Unkwnown	0.00100308	0.0371354	0.923409	0.034535
4146	83	181.159	98.159	264.159	Unkwnown	-0.000918366	0.0374963	0.936731	0.0415
4149	83.086	181.159	98.073	264.245	Unkwnown	0.000952402	0.0489598	0.915081	0.041543
4150	84.081	181.159	97.078	265.24	Unkwnown	0.000719005	0.467581	0.946576	0.0420405
4151	85.065	181.159	96.094	266.224	Unkwnown	-0.000887004	0.218724	0.937953	0.0425325
4159	97.065	181.159	84.094	278.224	Unkwnown	0.000557515	0.139774	0.923476	0.0485325
4161	99.08	181.159	82.079	280.239	Unkwnown	2.78223e-05	0.259192	0.954377	0.04954
4162	99.092	181.159	82.067	280.251	Unkwnown	-0.000250495	0.205418	0.950045	0.049546
4163	99.104	181.159	82.055	280.263	Unkwnown	0.000208703	0.18449	0.912864	0.049552
4179	111.104	181.159	70.055	292.263	Unkwnown	0.00127227	0.0749306	0.914538	0.055552
4182	112.112	181.159	69.047	293.271	Unkwnown	0.00209838	0.59733	0.904236	0.056056
4183	113.096	181.159	68.063	294.255	Unkwnown	0.000240695	0.338522	0.948885	0.056548
4184	113.107	181.159	68.052	294.266	Unkwnown	0.000272988	0.277078	0.922645	0.0565535
4189	125.084	181.159	56.075	306.243	Unkwnown	0.000399792	0.345733	0.916399	0.062542
4190	125.096	181.159	56.063	306.255	Unkwnown	-7.84498e-05	0.232901	0.949769	0.062548
4191	125.107	181.159	56.052	306.266	Unkwnown	0.000445032	0.165649	0.926683	0.0625535
4192	125.12	181.159	56.039	306.279	Unkwnown	0.000801243	0.146117	0.907105	0.06256
4193	127.112	181.159	54.047	308.271	Unkwnown	6.47599e-05	0.361448	0.920647	0.063556
4199	139.148	181.159	42.011	320.307	Unkwnown	0.000300811	0.29485	0.935008	0.069574
4207	163.099	181.159	18.06	344.258	H2O	-0.000773388	0.557284	0.919257	0.0815495
4208	163.123	181.159	18.036	344.282	H2O	-0.000395256	0.545959	0.933268	0.0815615
4209	163.136	181.159	18.023	344.295	H2O	5.89799e-06	0.547735	0.925023	0.081568
4210	163.148	181.159	18.011	344.307	H2O	0.00254843	1.16306	0.914468	0.081574
4215	179.107	181.159	2.052	360.266	Isotope-2	0.00194679	0.479935	0.938554	0.0895535
4219	41.039	181.17	140.131	222.209	Unkwnown	-0.000475866	0.0023682	0.923922	0.0205195
4224	57.07	181.17	124.1	238.24	Unkwnown	-0.000338241	0.00492303	0.927257	0.028535
4225	68.049	181.17	113.121	249.219	Unkwnown	-0.000472832	0.108138	0.923159	0.0340245
4226	69.07	181.17	112.1	250.24	Unkwnown	-0.000156122	0.00757902	0.943029	0.034535
4227	71.086	181.17	110.084	252.256	Unkwnown	-0.000538177	0.0115329	0.910156	0.035543
4230	83	181.17	98.17	264.17	Unkwnown	-0.000436461	0.00724937	0.94825	0.0415
4232	83.086	181.17	98.084	264.256	Unkwnown	-8.92822e-05	0.00954898	0.943042	0.041543
4233	84.081	181.17	97.089	265.251	Unkwnown	-0.000204636	0.0949241	0.962084	0.0420405
4234	85.065	181.17	96.105	266.235	Unkwnown	-0.000521028	0.0441999	0.922575	0.0425325
4235	85.101	181.17	96.069	266.271	Unkwnown	-0.000456017	0.0175739	0.90337	0.0425505
4236	86.096	181.17	95.074	267.266	Unkwnown	-0.000249455	0.21241	0.919861	0.043048
4243	97.065	181.17	84.105	278.235	Unkwnown	-0.00011127	0.0263987	0.913823	0.0485325
4244	97.101	181.17	84.069	278.271	Unkwnown	8.44614e-06	0.011779	0.922405	0.0485505
4245	99.08	181.17	82.09	280.25	Unkwnown	-0.000434899	0.0550862	0.944847	0.04954
4246	99.092	181.17	82.078	280.262	Unkwnown	-0.000429279	0.0422898	0.967681	0.049546
4247	99.104	181.17	82.066	280.274	Unkwnown	-0.000355033	0.0383851	0.948016	0.049552
4248	99.117	181.17	82.053	280.287	Unkwnown	-0.000260105	0.0400849	0.907689	0.0495585
4252	109.065	181.17	72.105	290.235	Unkwnown	-9.73895e-05	0.017914	0.916287	0.0545325
4253	109.076	181.17	72.094	290.246	Unkwnown	-8.88356e-05	0.0102162	0.915538	0.054538
4254	109.089	181.17	72.081	290.259	Unkwnown	-8.08863e-05	0.0083882	0.905702	0.0545445
4257	110.073	181.17	71.097	291.243	Unkwnown	-0.000222383	0.120023	0.91096	0.0550365
4258	110.084	181.17	71.086	291.254	Unkwnown	-0.000202974	0.081758	0.906771	0.055042
4261	111.104	181.17	70.066	292.274	Unkwnown	-0.000173637	0.0159544	0.944749	0.055552
4262	111.117	181.17	70.053	292.287	Unkwnown	-5.55817e-05	0.0166039	0.918422	0.0555585
4264	112.112	181.17	69.058	293.282	Unkwnown	-6.44531e-05	0.132586	0.944805	0.056056
4265	113.096	181.17	68.074	294.266	Unkwnown	-0.000372257	0.0713083	0.952729	0.056548
4266	113.107	181.17	68.063	294.277	Unkwnown	-0.000318609	0.0569552	0.948427	0.0565535
4271	125.096	181.17	56.074	306.266	Unkwnown	-0.000278493	0.0451356	0.95978	0.062548
4272	125.107	181.17	56.063	306.277	Unkwnown	-0.000207231	0.0326561	0.952679	0.0625535
4273	125.12	181.17	56.05	306.29	Unkwnown	-0.000184534	0.0296059	0.94307	0.06256
4274	127.112	181.17	54.058	308.282	Unkwnown	-0.000172286	0.067035	0.924352	0.063556
4275	127.136	181.17	54.034	308.306	Unkwnown	-0.000307671	0.0546064	0.919117	0.063568
4276	128.12	181.17	53.05	309.29	Unkwnown	0.000737146	0.433801	0.912832	0.06406
4280	139.148	181.17	42.022	320.318	Unkwnown	-0.000381417	0.0628102	0.962624	0.069574
4288	163.099	181.17	18.071	344.269	H2O	-0.000699341	0.123559	0.904444	0.0815495
4289	163.123	181.17	18.047	344.293	H2O	-0.000676992	0.124449	0.94318	0.0815615
4290	163.136	181.17	18.034	344.306	H2O	-0.000626386	0.127215	0.942176	0.081568
4291	163.148	181.17	18.022	344.318	H2O	-0.000123627	0.284859	0.937022	0.081574
4297	179.107	181.17	2.063	360.277	Isotope-2	-0.000135447	0.108909	0.927962	0.0895535
4300	181.159	181.17	0.011	362.329	Resolution	-0.000520058	0.220892	0.988535	0.0905795
4318	145.076	183.047	37.971	328.123	Unkwnown	0.000880492	0.890174	0.905415	0.072538
4319	145.122	183.047	37.925	328.169	Unkwnown	0.00847222	-4.6869	0.902115	0.072561
4335	183.047	183.08	0.033	366.127	Resolution	-0.000138362	0.0183917	0.908026	0.0915235
4357	175.148	189.164	14.016	364.312	CH2	0.0203853	18.7723	0.938801	0.087574
4358	187.148	189.164	2.016	376.312	Isotope-2	0.020432	24.6201	0.903449	0.093574
4361	57.07	191.143	134.073	248.213	Unkwnown	-0.000172077	0.000641059	0.951205	0.028535
4362	68.049	191.143	123.094	259.192	Unkwnown	-0.000230133	0.0162234	0.941536	0.0340245
4363	69.07	191.143	122.073	260.213	Unkwnown	-0.000184907	0.00114707	0.95018	0.034535
4364	71.086	191.143	120.057	262.229	Unkwnown	-0.000172767	0.00136334	0.952135	0.035543
4366	83	191.143	108.143	274.143	Unkwnown	-0.000269542	0.00124942	0.9163	0.0415
4367	83.086	191.143	108.057	274.229	Unkwnown	-0.000179012	0.00146946	0.95476	0.041543
4368	84.081	191.143	107.062	275.224	Unkwnown	-0.000231873	0.016482	0.92589	0.0420405
4370	85.101	191.143	106.042	276.244	Unkwnown	-0.00014853	0.00195167	0.945328	0.0425505
4371	86.096	191.143	105.047	277.239	Unkwnown	-0.000131063	0.0242271	0.930962	0.043048
4376	95.086	191.143	96.057	286.229	Unkwnown	-2.84924e-05	0.000412553	0.934627	0.047543
4377	96.057	191.143	95.086	287.2	Unkwnown	-0.000239855	0.0130811	0.933513	0.0480285
4379	97.101	191.143	94.042	288.244	Unkwnown	-0.000138566	0.00162139	0.971378	0.0485505
4381	99.092	191.143	92.051	290.235	Unkwnown	-0.000258119	0.00707348	0.900871	0.049546
4382	99.104	191.143	92.039	290.247	Unkwnown	-0.000204973	0.00560966	0.911868	0.049552
4383	99.117	191.143	92.026	290.26	Unkwnown	-0.000143481	0.00481695	0.909501	0.0495585
4384	109.065	191.143	82.078	300.208	Unkwnown	-0.000144054	0.00236851	0.953552	0.0545325
4385	109.076	191.143	82.067	300.219	Unkwnown	-0.000120929	0.00121556	0.972081	0.054538
4386	109.089	191.143	82.054	300.232	Unkwnown	-0.000100992	0.000901753	0.975513	0.0545445
4387	109.101	191.143	82.042	300.244	Unkwnown	-7.446e-05	0.000758846	0.97419	0.0545505
4389	110.073	191.143	81.07	301.216	Unkwnown	-0.000152786	0.0153479	0.956555	0.0550365
4390	110.084	191.143	81.059	301.227	Unkwnown	-0.000130773	0.00955584	0.966824	0.055042
4391	110.109	191.143	81.034	301.252	Unkwnown	-6.87473e-05	0.00629605	0.960081	0.0550545
4393	111.104	191.143	80.039	302.247	Unkwnown	-0.000259831	0.00307471	0.969809	0.055552
4394	111.117	191.143	80.026	302.26	Unkwnown	-0.000151609	0.00232865	0.976648	0.0555585
4396	112.112	191.143	79.031	303.255	Unkwnown	-0.000171569	0.02011	0.977384	0.056056
4399	123.092	191.143	68.051	314.235	Unkwnown	-7.50738e-05	0.00135549	0.975194	0.061546
4400	125.096	191.143	66.047	316.239	Unkwnown	-0.000250338	0.00797457	0.933071	0.062548
4401	125.107	191.143	66.036	316.25	Unkwnown	-0.000216404	0.00537821	0.955075	0.0625535
4402	125.12	191.143	66.023	316.263	Unkwnown	-0.000194755	0.00457422	0.96531	0.06256
4407	139.148	191.143	51.995	330.291	Unkwnown	-0.000208997	0.00918459	0.960105	0.069574
4408	149.096	191.143	42.047	340.239	Unkwnown	-0.000114335	0.00975983	0.948209	0.074548
4412	163.123	191.143	28.02	354.266	C2H4	-0.000224822	0.0166827	0.919465	0.0815615
4413	163.136	191.143	28.007	354.279	C2H4	-0.000201038	0.0160704	0.941941	0.081568
4414	163.148	191.143	27.995	354.291	C2H4	-0.000184134	0.0438085	0.952112	0.081574
4415	166.135	191.143	25.008	357.278	Unkwnown	-0.000239547	0.00250897	0.940259	0.0830675
4418	178.123	191.143	13.02	369.266	Unkwnown	-0.000349013	0.0830323	0.944387	0.0890615
4420	179.128	191.143	12.015	370.271	C	7.69848e-05	-0.257965	0.982959	0.089564
4421	180.151	191.143	10.992	371.294	Unkwnown	7.71499e-05	-0.10826	0.940685	0.0900755
4423	181.17	191.143	9.973	372.313	Unkwnown	-8.52646e-05	0.103033	0.923934	0.090585
4436	41.039	193.122	152.083	234.161	Unkwnown	-0.00383248	0.00745961	0.918872	0.0205195
4439	57.07	193.122	136.052	250.192	Unkwnown	-0.00415182	0.017446	0.941982	0.028535
4440	68.049	193.122	125.073	261.171	Unkwnown	-0.00429191	0.365411	0.95278	0.0340245
4441	69.07	193.122	124.052	262.192	Unkwnown	-0.00365061	0.02749	0.939047	0.034535
4442	71.086	193.122	122.036	264.208	Unkwnown	-0.00486683	0.0409051	0.923463	0.035543
4444	83	193.122	110.122	276.122	Unkwnown	-0.00437672	0.0252457	0.904479	0.0415
4445	83.086	193.122	110.036	276.208	Unkwnown	-0.0037085	0.0363602	0.921841	0.041543
4446	84.081	193.122	109.041	277.203	Unkwnown	-0.00343251	0.323261	0.918782	0.0420405
4448	85.101	193.122	108.021	278.223	Unkwnown	-0.00474283	0.0637811	0.903479	0.0425505
4449	86.096	193.122	107.026	279.218	Unkwnown	-0.00304817	0.660783	0.93744	0.043048
4455	95.086	193.122	98.036	288.208	Unkwnown	-0.00378848	0.0251093	0.912364	0.047543
4456	96.057	193.122	97.065	289.179	Unkwnown	-0.00474904	0.304474	0.943877	0.0480285
4458	97.101	193.122	96.021	290.223	Unkwnown	-0.00355031	0.046462	0.925907	0.0485505
4463	109.065	193.122	84.057	302.187	Unkwnown	-0.0034976	0.0656198	0.954247	0.0545325
4464	109.076	193.122	84.046	302.198	Unkwnown	-0.00364354	0.038512	0.954476	0.054538
4465	109.089	193.122	84.033	302.211	Unkwnown	-0.00367731	0.0319441	0.94979	0.0545445
4466	109.101	193.122	84.021	302.223	Unkwnown	-0.00365026	0.0314602	0.941984	0.0545505
4467	110.06	193.122	83.062	303.182	Unkwnown	-0.00180441	0.677513	0.935844	0.05503
4468	110.073	193.122	83.049	303.195	Unkwnown	-0.0036561	0.419639	0.957814	0.0550365
4469	110.084	193.122	83.038	303.206	Unkwnown	-0.00383313	0.297125	0.951887	0.055042
4470	110.109	193.122	83.013	303.231	Unkwnown	-0.00356074	0.267392	0.932456	0.0550545
4472	111.104	193.122	82.018	304.226	Unkwnown	-0.00373042	0.0580172	0.950457	0.055552
4473	111.117	193.122	82.005	304.239	Unkwnown	-0.0037367	0.0648191	0.933693	0.0555585
4475	112.112	193.122	81.01	305.234	Unkwnown	-0.00330616	0.479936	0.954786	0.056056
4478	123.092	193.122	70.03	316.214	Unkwnown	-0.0044602	0.0631957	0.941281	0.061546
4479	125.096	193.122	68.026	318.218	Unkwnown	-0.00386849	0.158204	0.915953	0.062548
4480	125.107	193.122	68.015	318.229	Unkwnown	-0.00396843	0.120876	0.92204	0.0625535
4481	125.12	193.122	68.002	318.242	Unkwnown	-0.0040249	0.111952	0.924171	0.06256
4484	128.12	193.122	65.002	321.242	Unkwnown	0.000101563	1.30772	0.901655	0.06406
4486	139.148	193.122	53.974	332.27	Unkwnown	-0.00422476	0.220011	0.936493	0.069574
4487	149.096	193.122	44.026	342.218	Unkwnown	-0.00360476	0.317902	0.925003	0.074548
4489	152.12	193.122	41.002	345.242	Unkwnown	0.000110346	0.183908	0.916325	0.07606
4491	163.123	193.122	29.999	356.245	Unkwnown	-0.00451712	0.394828	0.916036	0.0815615
4492	163.136	193.122	29.986	356.258	Unkwnown	-0.0044684	0.410073	0.932962	0.081568
4493	163.148	193.122	29.974	356.27	Unkwnown	-0.00124229	0.648724	0.939265	0.081574
4495	166.135	193.122	26.987	359.257	Unkwnown	-0.00312277	0.0455585	0.901733	0.0830675
4498	178.123	193.122	14.999	371.245	Unkwnown	-0.000526724	0.613979	0.911478	0.0890615
4499	179.107	193.122	14.015	372.229	CH2	-0.00391706	0.416787	0.93104	0.0895535
4500	179.128	193.122	13.994	372.25	CH2	0.00262118	1.80098	0.958837	0.089564
4501	180.151	193.122	12.971	373.273	Unkwnown	0.00261485	2.54922	0.908795	0.0900755
4502	181.159	193.122	11.963	374.281	C	-0.0036831	0.665339	0.911546	0.0905795
4503	181.17	193.122	11.952	374.292	C	0.000147746	1.57278	0.931078	0.090585
4504	191.143	193.122	1.979	384.265	Isotope-2	0.00253671	1.11277	0.961576	0.0955715
4510	71.086	194.154	123.068	265.24	Unkwnown	-0.00110174	0.0185495	0.918991	0.035543
4515	85.101	194.154	109.053	279.255	Unkwnown	-0.00090757	0.0277286	0.917942	0.0425505
4516	86.096	194.154	108.058	280.25	Unkwnown	-0.000536399	0.329875	0.920193	0.043048
4518	95.086	194.154	99.068	289.24	Unkwnown	-0.000112491	0.00942711	0.924465	0.047543
4519	96.057	194.154	98.097	290.211	Unkwnown	-0.00139333	0.152322	0.905339	0.0480285
4520	97.101	194.154	97.053	291.255	Unkwnown	-0.000548864	0.0214016	0.914679	0.0485505
4524	109.076	194.154	85.078	303.23	Unkwnown	-0.000608498	0.0178422	0.915464	0.054538
4525	109.089	194.154	85.065	303.243	Unkwnown	-0.000461749	0.0139759	0.934302	0.0545445
4526	109.101	194.154	85.053	303.255	Unkwnown	-0.000267611	0.0128498	0.950205	0.0545505
4528	110.073	194.154	84.081	304.227	Unkwnown	-0.000725207	0.201826	0.906652	0.0550365
4529	110.084	194.154	84.07	304.238	Unkwnown	-0.00063627	0.13489	0.925694	0.055042
4530	110.109	194.154	84.045	304.263	Unkwnown	-0.00016694	0.106443	0.954379	0.0550545
4531	111.104	194.154	83.05	305.258	Unkwnown	-0.00106464	0.030677	0.901599	0.055552
4532	111.117	194.154	83.037	305.271	Unkwnown	-0.000594265	0.029445	0.93032	0.0555585
4533	112.112	194.154	82.042	306.266	Unkwnown	-0.000620239	0.235954	0.933342	0.056056
4534	123.092	194.154	71.062	317.246	Unkwnown	-0.000514533	0.0250635	0.957812	0.061546
4541	149.096	194.154	45.058	343.25	Unkwnown	-0.00126194	0.181558	0.952896	0.074548
4545	166.135	194.154	28.019	360.289	C2H4	-0.000376797	0.0211826	0.987293	0.0830675
4548	178.123	194.154	16.031	372.277	Unkwnown	-0.00164712	0.768509	0.959476	0.0890615
4549	179.128	194.154	15.026	373.282	Unkwnown	0.00229422	0.244491	0.956763	0.089564
4550	180.151	194.154	14.003	374.305	CH2	0.00229403	0.115024	0.991808	0.0900755
4552	191.143	194.154	3.011	385.297	Isotope-3	0.00207271	2.8847	0.939711	0.0955715
4553	193.122	194.154	1.032	387.276	Isotope-1	0.00132397	0.370065	0.901548	0.096561
4560	193.101	195.065	1.964	388.166	Isotope-2	0.00170409	0.529486	0.953284	0.0965505
4606	179.086	195.138	16.052	374.224	Unkwnown	-0.000803931	0.775078	0.921409	0.089543
4607	179.107	195.138	16.031	374.245	Unkwnown	0.000973604	0.261726	0.912345	0.0895535
4608	181.159	195.138	13.979	376.297	CH2	-0.000914074	0.632499	0.903438	0.0905795
4617	145.076	197.132	52.056	342.208	Unkwnown	-0.016885	3.50158	0.913336	0.072538
4623	187.148	197.132	9.984	384.28	Unkwnown	0.0130943	-11.0607	0.916208	0.093574
4624	189.164	197.132	7.968	386.296	Unkwnown	-0.00237132	0.739532	0.920862	0.094582
4631	187.148	201.139	13.991	388.287	CH2	0.000348497	0.137458	0.962286	0.093574
4632	189.164	201.139	11.975	390.303	C	-0.00106627	0.0683244	0.968182	0.094582
4633	197.132	201.139	4.007	398.271	Isotope-4	-0.000204302	0.0427832	0.947194	0.098566
4642	175.148	203.154	28.006	378.302	C2H4	0.000257091	2.44988	0.906551	0.087574
4643	187.148	203.154	16.006	390.302	Unkwnown	0.000293187	0.743478	0.918088	0.093574
4644	189.164	203.154	13.99	392.318	CH2	-0.000995212	0.0625838	0.968529	0.094582
4646	201.139	203.154	2.015	404.293	Isotope-2	0.00010089	0.574949	0.957697	0.10057
4651	41.039	205.157	164.118	246.196	Unkwnown	-0.000757556	0.0290501	0.904077	0.0205195
4654	57.07	205.157	148.087	262.227	Unkwnown	-0.000154682	0.0631847	0.936558	0.028535
4655	68.049	205.157	137.108	273.206	Unkwnown	0.000670478	1.253	0.907449	0.0340245
4656	69.07	205.157	136.087	274.227	Unkwnown	0.00201757	0.0979971	0.916188	0.034535
4657	71.086	205.157	134.071	276.243	Unkwnown	-0.000590191	0.136382	0.90521	0.035543
4659	82.078	205.157	123.079	287.235	Unkwnown	0.00379441	0.712902	0.914345	0.041039
4668	95.086	205.157	110.071	300.243	Unkwnown	0.00199501	0.0876736	0.944686	0.047543
4675	109.065	205.157	96.092	314.222	Unkwnown	0.00278548	0.231538	0.928355	0.0545325
4676	109.076	205.157	96.081	314.233	Unkwnown	0.00289506	0.13205	0.93297	0.054538
4677	109.089	205.157	96.068	314.246	Unkwnown	0.00318036	0.107496	0.931144	0.0545445
4678	109.101	205.157	96.056	314.258	Unkwnown	0.0037087	0.103674	0.924427	0.0545505
4680	110.073	205.157	95.084	315.23	Unkwnown	0.00286208	1.43819	0.924848	0.0550365
4681	110.084	205.157	95.073	315.241	Unkwnown	0.00245388	1.00917	0.933086	0.055042
4682	110.109	205.157	95.048	315.266	Unkwnown	0.00410391	0.876835	0.921315	0.0550545
4684	111.117	205.157	94.04	316.274	Unkwnown	0.003478	0.213054	0.907012	0.0555585
4686	123.092	205.157	82.065	328.249	Unkwnown	0.001381	0.20521	0.917942	0.061546
4691	139.148	205.157	66.009	344.305	Unkwnown	0.000672023	0.761769	0.914345	0.069574
4692	149.096	205.157	56.061	354.253	Unkwnown	0.000902175	1.19856	0.906154	0.074548
4695	163.136	205.157	42.021	368.293	Unkwnown	-0.0010464	1.47044	0.917902	0.081568
4696	163.148	205.157	42.009	368.305	Unkwnown	0.00770783	2.79856	0.927024	0.081574
4713	57.07	205.195	148.125	262.265	Unkwnown	-0.00245135	0.0129042	0.928014	0.028535
4714	68.049	205.195	137.146	273.244	Unkwnown	-0.00208843	0.245627	0.902473	0.0340245
4715	69.07	205.195	136.125	274.265	Unkwnown	-0.00198629	0.0199201	0.905673	0.034535
4716	71.086	205.195	134.109	276.281	Unkwnown	-0.00282218	0.029393	0.904521	0.035543
4718	82.078	205.195	123.117	287.273	Unkwnown	-0.000504378	0.106099	0.916232	0.041039
4727	95.086	205.195	110.109	300.281	Unkwnown	-0.0010647	0.014194	0.949954	0.047543
4734	109.065	205.195	96.13	314.26	Unkwnown	-0.00157395	0.0443176	0.918974	0.0545325
4735	109.076	205.195	96.119	314.271	Unkwnown	-0.00141204	0.0244089	0.927056	0.054538
4736	109.089	205.195	96.106	314.284	Unkwnown	-0.00126883	0.0194115	0.928672	0.0545445
4737	109.101	205.195	96.094	314.296	Unkwnown	-0.00108094	0.0182574	0.925478	0.0545505
4739	110.073	205.195	95.122	315.268	Unkwnown	-0.00147197	0.269441	0.919434	0.0550365
4740	110.084	205.195	95.111	315.279	Unkwnown	-0.00142803	0.183523	0.930188	0.055042
4741	110.109	205.195	95.086	315.304	Unkwnown	-0.000951198	0.151813	0.925918	0.0550545
4743	111.117	205.195	94.078	316.312	Unkwnown	-0.00157654	0.0421573	0.904188	0.0555585
4745	123.092	205.195	82.103	328.287	Unkwnown	-0.00144102	0.0356935	0.920595	0.061546
4750	139.148	205.195	66.047	344.343	Unkwnown	-0.00243247	0.160395	0.905435	0.069574
4751	149.096	205.195	56.099	354.291	Unkwnown	-0.00169518	0.217196	0.912469	0.074548
4754	163.136	205.195	42.059	368.331	Unkwnown	-0.00297691	0.32017	0.902155	0.081568
4755	163.148	205.195	42.047	368.343	Unkwnown	-0.0014185	0.667724	0.914826	0.081574
4767	205.157	205.195	0.038	410.352	Resolution	-0.00150942	0.166889	0.997193	0.102579
4799	197.132	211.148	14.016	408.28	CH2	0.00352058	-0.00780242	0.938798	0.098566
4800	201.139	211.148	10.009	412.287	Unkwnown	0.0031267	0.836064	0.911289	0.10057
4803	75.044	228.093	153.049	303.137	Unkwnown	-0.000715035	0.000561292	0.93172	0.037522
4804	75.068	228.093	153.025	303.161	Unkwnown	-6.34317e-05	0.00198604	0.93653	0.037534
4815	167.07	228.093	61.023	395.163	Unkwnown	-8.97011e-05	0.00317215	0.908553	0.083535
4816	167.086	228.093	61.007	395.179	Unkwnown	0.000155016	1.36096	0.906519	0.083543
4819	180.151	228.093	47.942	408.244	Unkwnown	0.000243194	-0.352124	0.919008	0.0900755
4844	116.143	331.851	215.708	447.994	Unkwnown	1.21157	4.38983	1	0.0580715
4845	127.903	331.851	203.948	459.754	Unkwnown	1.21157	6.26842	1	0.0639515
4846	153.98	331.851	177.871	485.831	Unkwnown	0.652872	30.4904	1	0.07699
